# Supplementary material for: Cu-Catalyzed highly selective silylation and borylation of alkenylsulfonium salts
Source: Royal Society of Chemistry journal article supplement (doi:10.1039/d1qo00922b), 2021-01-01

## Supporting Information

# Cu-Catalyzed Highly Selective Silylation and Borylation of Alkenylsulfonium Salts

Rong Xie, Jie Zhu and Yinhua Huang\*

†College of Materials, Chemistry and Chemical Engineering, Hangzhou Normal University,  
Hangzhou 311121, China

Email: [yhhuang@hznu.edu.cn](mailto:yhhuang@hznu.edu.cn)

### Contents of Supporting Information:

|                                                                                                                                    |     |
|------------------------------------------------------------------------------------------------------------------------------------|-----|
| <b>1. General Information</b> .....                                                                                                | S2  |
| <b>2. Experimental Details</b> .....                                                                                               | S2  |
| 2.1 Preparation of Substrates.....                                                                                                 | S2  |
| 2.2 Optimization of Reaction Conditions.....                                                                                       | S5  |
| 2.3 General Procedure for the Reaction of Alkenyl Thianthrenium Salts with<br>Me <sub>2</sub> PhSi-Bpin (For Table 2).....         | S6  |
| 2.4 General Procedure for the Reaction of Alkenyl Thianthrenium Salts with<br>B <sub>2</sub> (pin) <sub>2</sub> (For Table 3)..... | S6  |
| 2.5 Control Experiments.....                                                                                                       | S7  |
| 2.6 Gram Scale Experiments.....                                                                                                    | S10 |
| <b>3. Characterization Data of the Products</b> .....                                                                              | S10 |
| <b>4. References</b> .....                                                                                                         | S28 |
| <b>5. NMR Spectra</b> .....                                                                                                        | S31 |

# 1 General Information

All air-sensitive manipulations were carried out with standard Schlenk techniques under nitrogen or argon. Solvents were distilled prior to use when necessary. NMR spectra were recorded on Bruker AMX 500 spectrophotometer (500 MHz for  $^1\text{H}$ , 126 MHz for  $^{13}\text{C}$  and 471 Hz for  $^{19}\text{F}$ ). Chemical shifts are reported in  $\delta$  (ppm) referenced to an internal  $\text{SiMe}_4$  standard ( $\delta = 0$  ppm) for  $^1\text{H}$  NMR, chloroform- $d$  ( $\delta = 77.0$  ppm) for  $^{13}\text{C}$  NMR. The following abbreviations were used; s: singlet, d: doublet, t: triplet, q: quartet, m: multiplet, br: broad. HRMS (ESI-TOF) were recorded on a time-of-flight (TOF) LC/MS instrument. Flash column chromatography was performed with Silica gel 60 (Merck) or  $\text{Al}_2\text{O}_3$  (activated 200) (Merck).

All chemicals and solvents were purchased from commercial company and used as received. Solvents were degassed before use if necessary.

## 2 Experimental Details

### 2.1 Preparation of Substrates

$\text{Me}_2\text{PhSi-Bpin}$  (**2**) (CAS: 185990-03-8) and  $\text{B}_2\text{pin}_2$  (**4**) (CAS: 73183-34-3) were purchased from commercial company and used as received.

The known alkenyl thianthrenium salts (**1a**, **1c-1e**, **1k-1n**, **1o**, **1v**) were prepared according to the reported procedures.<sup>1a</sup> The new alkenyl thianthrenium salts (**1b**, **1f-1j**, **1w**) were prepared by the same method. The new alkenyl thianthrenium salts (**1p-1u**) were prepared by the revised procedure.<sup>1b</sup>

### Scheme S1. Alkenyl Sulfonium Salts Substrates

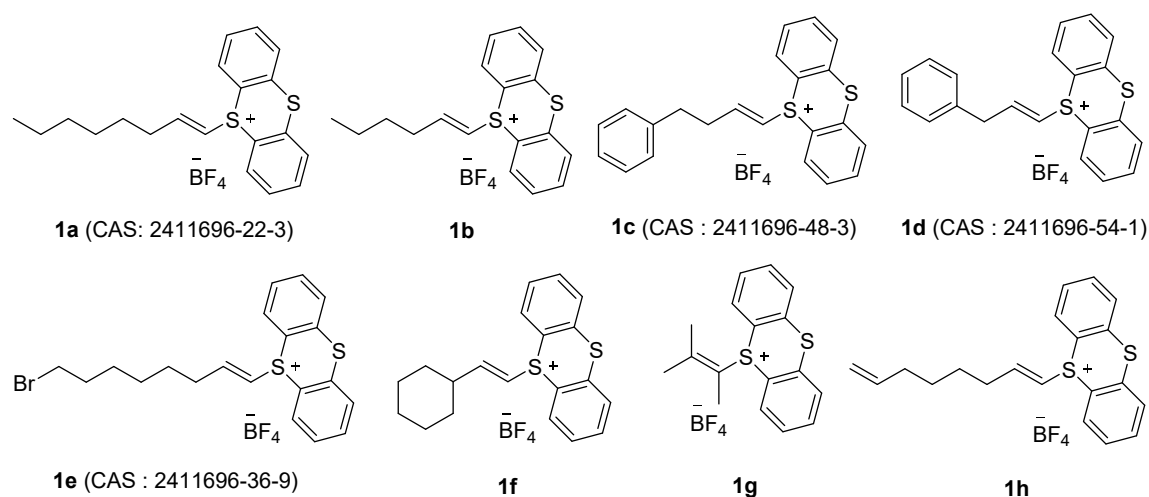

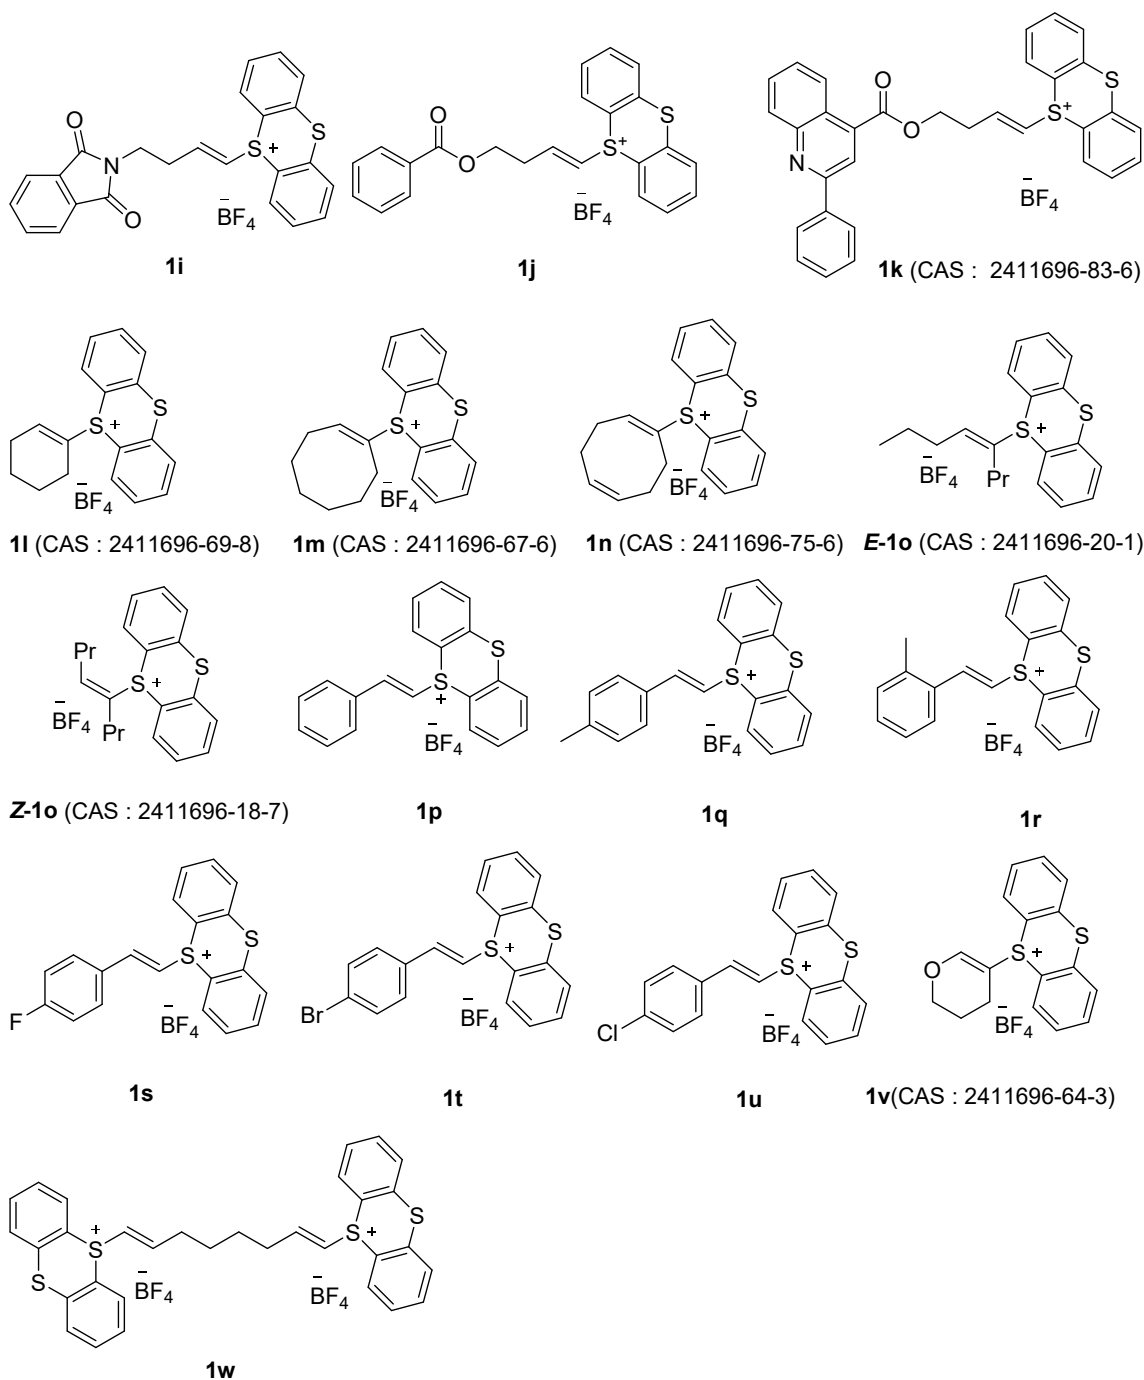

**(a) General procedure for the synthesis of alkenyl thianthrenium salts (1a-1o, 1v-1w)<sup>1a</sup>**

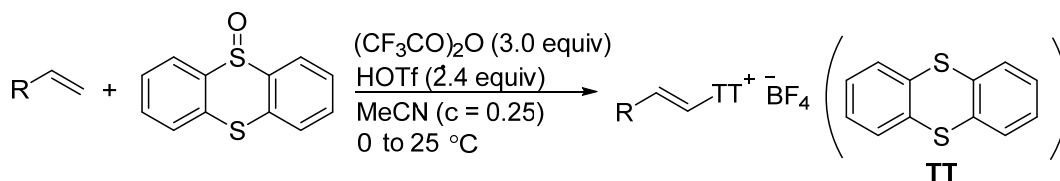

**General procedure A (GPA):** Under ambient atmosphere, a 20 mL glass-vial equipped with a magnetic stir bar was charged with alkene compound (3.00

mmol, 1.00 equiv.), thianthrene S-oxide (718 mg, 3.09 mmol, 1.03 equiv.), and MeCN (12 mL, c = 0.25 M). After cooling to 0 °C, trifluoroacetic anhydride (1.26 mL, 1.89 g, 9.00 mmol, 3.00 equiv.) was added dropwise, followed by dropwise addition of HOTf (624 μL, 1.06 g, 7.20 mmol, 2.40 equiv.). After stirring the lilac mixture at 0 °C for 60 min followed by stirring at 25 °C for 30 min, the resulting light pink mixture was concentrated under reduced pressure and subsequently diluted with CH<sub>2</sub>Cl<sub>2</sub> (10 mL). The CH<sub>2</sub>Cl<sub>2</sub> solution was poured onto a saturated aqueous NaHCO<sub>3</sub> solution (ca. 20 mL). The combined mixture was poured into a separatory funnel, and the layers were separated. The CH<sub>2</sub>Cl<sub>2</sub> layer was collected, and the aqueous layer was further extracted with CH<sub>2</sub>Cl<sub>2</sub> (2 × 10 mL). The combined CH<sub>2</sub>Cl<sub>2</sub> solution was washed with aqueous NaBF<sub>4</sub> solution (2 × 20 mL, 5% w/w). The CH<sub>2</sub>Cl<sub>2</sub> layer was dried over Na<sub>2</sub>SO<sub>4</sub>, filtered, and the solvent was removed under reduced pressure. The residue was purified by chromatography on silica gel eluting with CH<sub>2</sub>Cl<sub>2</sub>/MeOH (1:0 gradient to 20:1 (v/v)). The product-containing fractions were collected and concentrated under reduced pressure. The residue was further dried in vacuo to afford the corresponding alkenyl thianthrenium salt.

**(b) General procedure for the synthesis of alkenyl thianthrenium salts (1p-1u).<sup>1b</sup>**

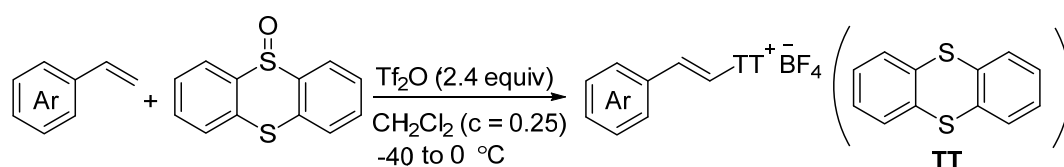

**General procedure B (GPB):** Under ambient atmosphere, a 20 mL glass-vial equipped with a magnetic stir bar was charged with styrene (3.00 mmol, 1.00 equiv.), thianthrene S-oxide (767 mg, 3.30 mmol, 1.1 equiv.), and CH<sub>2</sub>Cl<sub>2</sub> (12 mL, c = 0.25 M). After cooling to -40 °C, triflic anhydride (0.440 mL, 846 mg, 3.00 mmol, 1.00 equiv.) was added dropwise. After stirring the lilac mixture at -40 °C for 30 min followed by stirring at 0 °C for 30 min. And the resulting dark blue mixture was stirred at 25 °C for 2 h. The solution was poured onto a saturated aqueous NaHCO<sub>3</sub> solution (ca. 20 mL). The combined mixture was poured into a separatory funnel, and the layers were separated. The CH<sub>2</sub>Cl<sub>2</sub> layer was collected, and the aqueous layer was further extracted with CH<sub>2</sub>Cl<sub>2</sub> (2 × 10 mL). The combined CH<sub>2</sub>Cl<sub>2</sub> solution was washed with aqueous NaBF<sub>4</sub>

solution (2 × 20 mL, 5% w/w). The CH<sub>2</sub>Cl<sub>2</sub> layer was dried over Na<sub>2</sub>SO<sub>4</sub>, filtered, and the solvent was removed under reduced pressure. The residue was purified by chromatography on silica gel eluting with CH<sub>2</sub>Cl<sub>2</sub> / MeOH (1:0 gradient to 20:1 (v/v)). The product-containing fractions were collected and concentrated under reduced pressure. The residue was further dried in vacuo to afford the corresponding product.

## 2.1 Optimization of Conditions

**Table S1. Optimization of Conditions<sup>a</sup>**

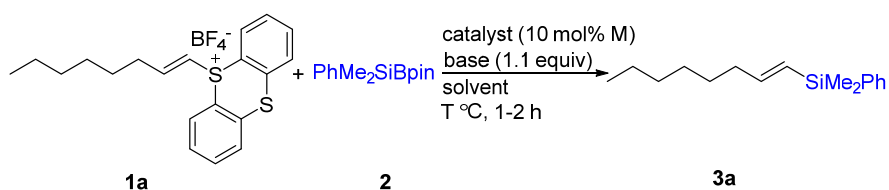

| entry                 | catalyst <sup>b</sup>              | base                           | solvent    | yield (%) <sup>c</sup><br><b>3a</b> |
|-----------------------|------------------------------------|--------------------------------|------------|-------------------------------------|
| 1 <sup>d</sup>        | none                               | NaO <sup>t</sup> Bu            | dioxane    | <3                                  |
| 2                     | Pd(OAc) <sub>2</sub>               | NaO <sup>t</sup> Bu            | dioxane    | 30                                  |
| 3                     | Pd(PPh <sub>3</sub> ) <sub>4</sub> | NaO <sup>t</sup> Bu            | dioxane    | 37                                  |
| 4 <sup>d</sup>        | Pd <sub>2</sub> (dba) <sub>3</sub> | NaO <sup>t</sup> Bu            | dioxane    | <3                                  |
| 5                     | CuI                                | NaO <sup>t</sup> Bu            | dioxane    | 20                                  |
| 6                     | Cu(OTf) <sub>2</sub>               | NaO <sup>t</sup> Bu            | dioxane    | 30                                  |
| 7                     | CuCl                               | NaO <sup>t</sup> Bu            | dioxane    | 50                                  |
| 8                     | CuCl                               | LiO <sup>t</sup> Bu            | dioxane    | 89                                  |
| 9                     | CuCl                               | KO <sup>t</sup> Bu             | dioxane    | 10                                  |
| 10                    | CuCl                               | K <sub>2</sub> CO <sub>3</sub> | dioxane    | 30                                  |
| 11 <sup>e</sup>       | CuCl                               | LiO <sup>t</sup> Bu            | dioxane    | 85                                  |
| 12 <sup>f</sup>       | CuCl                               | LiO <sup>t</sup> Bu            | dioxane    | 98                                  |
| 13                    | CuCl                               | LiO <sup>t</sup> Bu            | MeOH       | 30                                  |
| 14                    | CuCl                               | LiO <sup>t</sup> Bu            | THF        | 85                                  |
| <b>15<sup>f</sup></b> | <b>CuCl</b>                        | <b>LiO<sup>t</sup>Bu</b>       | <b>DCM</b> | <b>99(95)</b>                       |

<sup>a</sup> Reaction conditions: **1a** (0.10 mmol), **2** (0.20 mmol), base (1.1 equiv), solvent (1 mL), at 25 °C for 2 h. <sup>b</sup> Catalyst (10 mol% of M) was loaded if applicable. <sup>c</sup> The yields were obtained by <sup>1</sup>H NMR analysis of the crude reaction mixture with the aid of Cl<sub>2</sub>CHCHCl<sub>2</sub> as an internal standard. Isolated yields in parentheses. <sup>d</sup> The starting material **1a** decomposed seriously. <sup>e</sup> The reaction was open to air. <sup>f</sup> The reaction was stirred at 50 °C for 1 h. THF = tetrahydrofuran; DCM = dichloromethane.

### A typical procedure for entry 15:

CuCl (1.0 mg, 0.010 mmol, 10 mol%), Me<sub>2</sub>PhSi-Bpin (**2**) (52.4 mg, 0.200 mmol), alkenyl thianthrenium salt **1a** (41.4 mg, 0.100 mmol), and LiO<sup>t</sup>Bu (8.8 mg, 0.11 mmol) were placed in a Schlenk tube under nitrogen. Distilled DCM (1.0 mL) was added, and the mixture was stirred at 50 °C in a pre-heated oil bath for 1 h.

The reaction mixture was passed through a short column of silica-gel with DCM as eluent. The solvent was removed on a rotary evaporator and the residue was subjected to silica-gel chromatography (petroleum ether) to give **3a** (23.3 mg, 95% yield) as a colorless oil.

## 2.2 General Procedure for the Reaction of Alkenyl Thianthrenium Salts with Me<sub>2</sub>PhSi-Bpin (For Table 2)

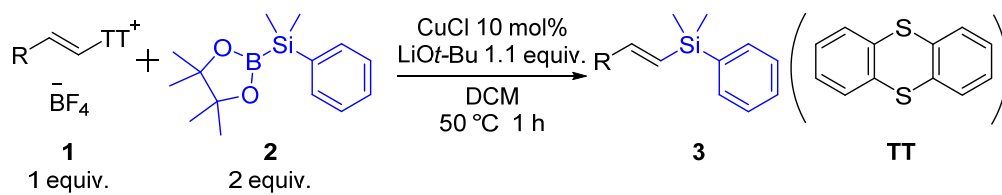

**General Procedure C (GPC):** CuCl (1.0 mg, 0.01 mmol, 10 mol%), Me<sub>2</sub>PhSi-Bpin (**2**) (52.4 mg, 0.200 mmol), alkenyl thianthrenium salt **1** (0.100 mmol), and LiO<sup>t</sup>Bu (8.8 mg, 0.11 mmol) were placed in a Schlenk tube under nitrogen. Distilled DCM (1.0 mL) was added, and the mixture was stirred at 50 °C in a pre-heated oil bath for 1 h. The reaction mixture was passed through a short column of silica-gel with DCM as eluent. After further removal of solvent by vacuum pump, the crude <sup>1</sup>H NMR was taken for analysis. The solvent was removed on a rotary evaporator and the residue was subjected to silica-gel chromatography (petroleum ether) to give the corresponding product **3**.

## 2.3 General Procedure for the Reaction of Alkenyl Thianthrenium Salts with B<sub>2</sub>(pin)<sub>2</sub> (For Table 3)

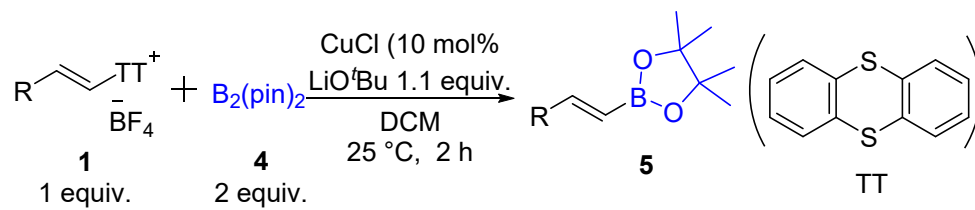

**General Procedure D (GPD):** CuCl (1.0 mg, 0.010 mmol, 10 mol%), B<sub>2</sub>(pin)<sub>2</sub> (**4**) (50.8 mg, 0.200 mmol), alkenyl thianthrenium salt **1** (0.100 mmol), and LiO<sup>t</sup>Bu (8.8 mg, 0.11 mmol) were placed in a Schlenk tube under nitrogen. Distilled DCM (1.0 mL) was added, and the mixture was stirred at 25 °C in for 2 h. The reaction mixture was passed through a short column of silica-gel with DCM as eluent. After further removal of solvent by vacuum pump, the crude <sup>1</sup>H NMR was taken for analysis. The solvent was removed on a rotary evaporator and the

residue was subjected to silica-gel chromatography (EtOAc/petroleum ether = 1/20) to give the corresponding product **5**.

## 2.4 Control experiments

### (1) Double silylation of **1w**

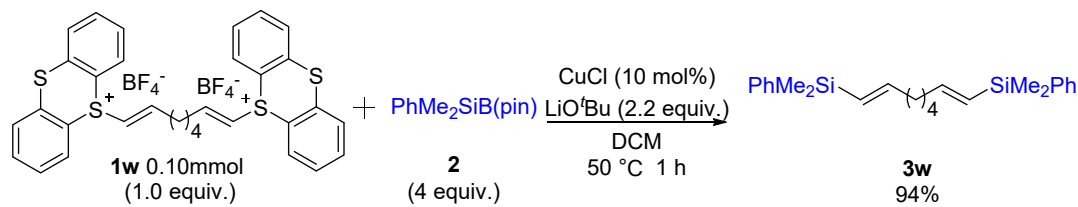

CuCl (1.0 mg, 0.010 mmol, 10 mol%), Me<sub>2</sub>PhSi-Bpin (**2**) (104 mg, 0.400 mmol), alkenyl thianthrenium salt **1w** (71.4 mg, 0.100 mmol), and LiO<sup>t</sup>Bu (17.6 mg, 0.220 mmol) were placed in a Schlenk tube under nitrogen. Distilled DCM (1.0 mL) was added, and the mixture was stirred at 50 °C in a pre-heated oil bath for 1 h. The reaction mixture was passed through a short column of silica-gel with DCM as eluent. After further removal of solvent by vacuum pump, the crude <sup>1</sup>H NMR was taken for analysis. The solvent was removed on a rotary evaporator and the residue was subjected to silica-gel chromatography (petroleum ether) to give **3w** (35.5 mg, 94%).

### (2) Double borylation of **1w**

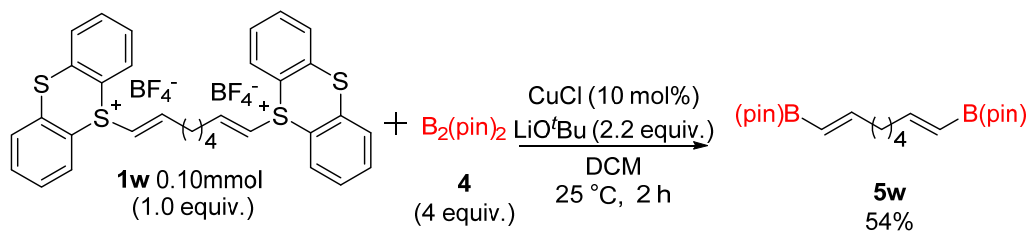

CuCl (1.0 mg, 0.010 mmol, 10 mol%), B<sub>2</sub>(pin)<sub>2</sub> (**4**) (102 mg, 0.400 mmol), alkenyl thianthrenium salt **1w** (71.4 mg, 0.100 mmol), and LiO<sup>t</sup>Bu (17.6 mg, 0.220 mmol) were placed in a Schlenk tube under nitrogen. Distilled DCM (1.0 mL) was added, and the mixture was stirred at 25 °C in for 2 h. The reaction mixture was passed through a short column of silica-gel with DCM as eluent. After further removal of solvent by vacuum pump, the crude <sup>1</sup>H NMR was taken for analysis. The solvent was removed on a rotary evaporator and the residue was subjected to silica-gel chromatography (EtOAc/petroleum ether = 1/20) to give the corresponding product **5w** (19.6 mg, 54%).

### (3) Radical trapping experiments

#### (a) Radical trapping experiment for the silylation

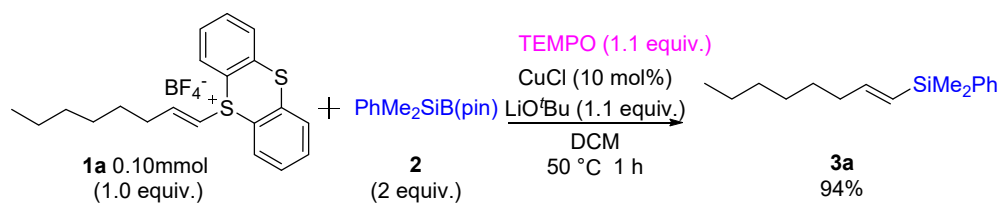

TEMPO (17.2 mg, 0.110 mmol), CuCl (1.0 mg, 0.010 mmol, 10 mol%), Me<sub>2</sub>PhSi-Bpin (**2**) (52.4 mg, 0.200 mmol), alkenyl thianthrenium salt **1a** (41.4 mg, 0.100 mmol), and LiO<sup>t</sup>Bu (8.8 mg, 0.11 mmol) were placed in a Schlenk tube under nitrogen. Distilled DCM (1.0 mL) was added, and the mixture was stirred at 50 °C in a pre-heated oil bath for 1 h. The reaction mixture was passed through a short column of silica-gel with DCM as eluent. After further removal of solvent by vacuum pump, the crude <sup>1</sup>H NMR was taken for analysis. The solvent was removed on a rotary evaporator and the residue was subjected to silica-gel chromatography (petroleum ether) to give the corresponding product **3a** (23.2 mg, 94%).

#### (b) Radical trapping experiment for the borylation

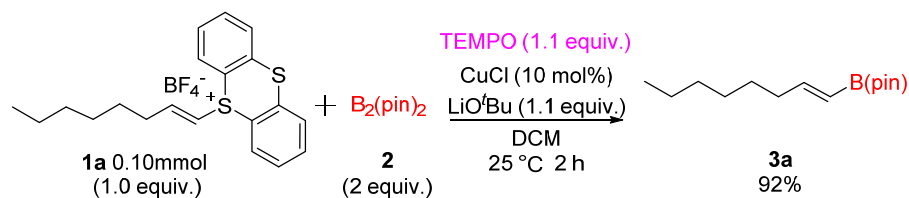

TEMPO (17.2 mg, 0.110 mmol), CuCl (1.0 mg, 0.010 mmol, 10 mol%), B<sub>2</sub>(pin)<sub>2</sub> (**4**) (50.8 mg, 0.200 mmol), alkenyl thianthrenium salt **1a** (41.4 mg, 0.100 mmol), and LiO<sup>t</sup>Bu (8.8 mg, 0.11 mmol) were placed in a Schlenk tube under nitrogen. Distilled DCM (1.0 mL) was added, and the mixture was stirred at 25 °C in for 2 h. The reaction mixture was passed through a short column of silica-gel with DCM as eluent. After further removal of solvent by vacuum pump, the crude <sup>1</sup>H NMR was taken for analysis. The solvent was removed on a rotary evaporator and the residue was subjected to silica-gel chromatography (EtOAc/petroleum ether = 1/20) to give the corresponding product **5a** (21.9 mg, 92%).

### (4) Competition experiments



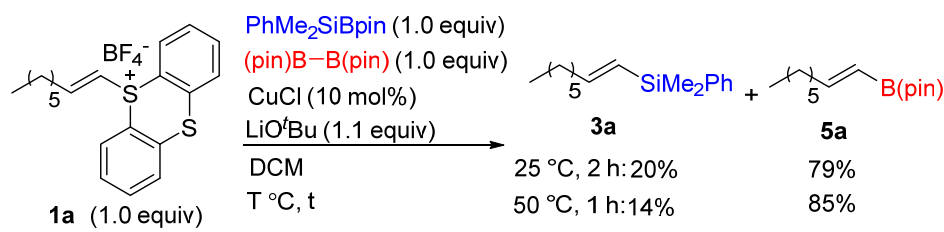

$\text{CuCl}$  (1.0 mg, 0.010 mmol, 10 mol%),  $\text{Me}_2\text{PhSi-Bpin}$  (**2**) (26.2 mg, 0.100 mmol),  $\text{B}_2(\text{pin})_2$  (**4**) (25.4 mg, 0.100 mmol), alkenyl thianthrenium salt **1a** (41.4 mg, 0.100 mmol), and  $\text{LiO}^t\text{Bu}$  (8.8 mg, 0.11 mmol) were placed in a Schlenk tube under nitrogen. Distilled DCM (1.0 mL) was added, and the mixture was stirred under the given conditions (**Conditions 1**: 25 °C, 2 h; **Conditions 2**: 50 °C, 1 h). The reaction mixture was passed through a short column of silica-gel with DCM as eluent. After further removal of solvent by vacuum pump, the crude  $^1\text{H}$  NMR was taken for analysis. The yields of **3a** and **5a** were obtained by  $^1\text{H}$  NMR analysis of the crude reaction mixture with the aid of  $\text{Cl}_2\text{CHCHCl}_2$  as an internal standard (Conditions 1: **3a** 20%, **5a** 79%; Conditions 2: **3a** 14%, **5a** 85%).

## 2.5 Gram Scale Experiments

### a) Gram scale experiment for the silylation

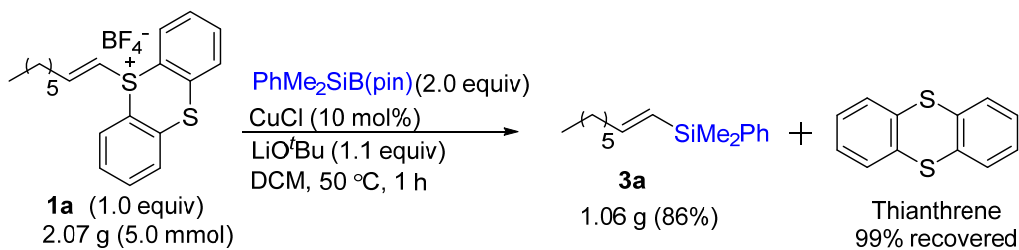

$\text{CuCl}$  (49.5 mg, 0.500 mmol, 10.0 mol%),  $\text{Me}_2\text{PhSi-Bpin}$  (**2**) (2.62 g, 10.0 mmol), alkenyl thianthrenium salt **1a** (2.07 g, 5.00 mmol), and  $\text{LiO}^t\text{Bu}$  (440 mg, 5.50 mmol) were placed in a Schlenk tube under nitrogen. Distilled DCM (25 mL) was added, and the mixture was stirred at 50 °C in a pre-heated oil bath for 1 h. The reaction mixture was passed through a short column of silica-gel with DCM as eluent. After further removal of solvent by vacuum pump, the crude  $^1\text{H}$  NMR was taken for analysis. The solvent was removed on a rotary evaporator and the residue was subjected to silica-gel chromatography (petroleum ether) to give the corresponding product **3a** (1.06 g, 86%) and thianthrene (1.07 g, 99%).

### b) Gram scale experiment for the borylation

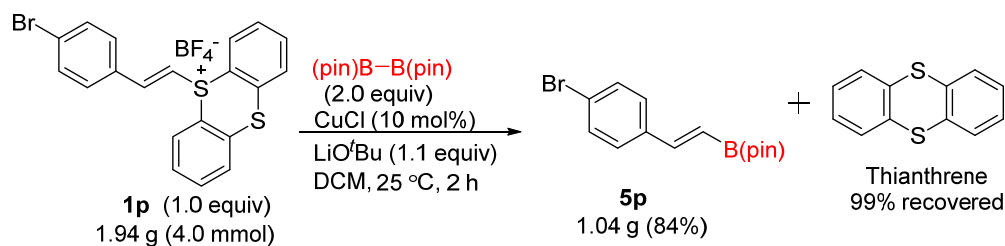

CuCl (39.6 mg, 0.400 mmol, 10.0 mol%),  $\text{B}_2(\text{pin})_2$  (**4**) (2.03 g, 8.00 mmol), alkenyl thianthrenium salt **1p** (1.94 g, 4.00 mmol), and LiOt-Bu (352 mg, 4.40 mmol) were placed in a Schlenk tube under nitrogen. Distilled DCM (25 mL) was added, and the mixture was stirred at 25 °C in for 2 h. The reaction mixture was passed through a short column of silica-gel with DCM as eluent. After further removal of solvent by vacuum pump, the crude  $^1\text{H}$  NMR was taken for analysis. The solvent was removed on a rotary evaporator and the residue was subjected to silica-gel chromatography (EtOAc/petroleum ether = 1/20) to give the corresponding product **5p** (1.04 g, 84%) and thianthrene (857 mg, 99%).

### 3 Characterization Data of the Products

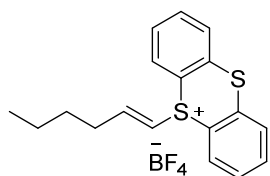

**Compound 1b.** Following **GPA**, the product was prepared and purified by flash column chromatography (eluent:  $\text{CH}_2\text{Cl}_2/\text{MeOH} = 100/1$ ) as a yellow oil (695 mg, 60%).  $^1\text{H}$  NMR (500 MHz,  $\text{CDCl}_3$ )  $\delta$  8.33 (dd,  $J = 1.1$  Hz, 7.9 Hz, 2H), 7.83 (dd,  $J = 1.1$  Hz, 7.9 Hz, 2H), 7.74 (td,  $J = 1.2$  Hz, 7.7 Hz, 2H), 7.65 (td,  $J = 1.2$  Hz, 7.7 Hz, 2H), 7.28-7.21 (m, 1H), 6.55 (dt,  $J = 1.3$  Hz, 14.8 Hz, 1H), 2.27-2.21 (m, 2H), 1.41-1.33 (m, 2H), 1.27-1.19 (m, 2H), 0.81 (t,  $J = 7.3$  Hz, 3H).  $^{13}\text{C}$  NMR (126 MHz,  $\text{CDCl}_3$ )  $\delta$  157.2, 135.5, 134.4, 133.6, 130.3, 130.0, 120.5, 109.1, 33.0, 29.2, 22.0, 13.6.  $^{19}\text{F}$  NMR (471 MHz,  $\text{CDCl}_3$ )  $\delta$  -150.74 (brs), -150.80 (brs). **HRMS** (ESI-TOF)  $m/z$ :  $[\text{M}]^+$  Calcd for  $\text{C}_{18}\text{H}_{19}\text{S}_2^+$  299.0923; found 299.0918.

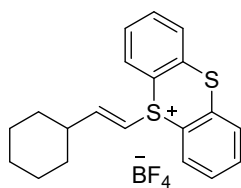

**Compound 1f.** Following **GPA**, the product was prepared and purified by flash column chromatography (eluent:  $\text{CH}_2\text{Cl}_2/\text{MeOH} = 100/1$ ) as a

white solid. **<sup>1</sup>H NMR** (500 MHz, CDCl<sub>3</sub>) δ 8.37 (dd, *J* = 1.0 Hz, 7.9 Hz, 2H), 7.82 (dd, *J* = 1.0 Hz, 7.9 Hz, 2H), 7.73 (td, *J* = 1.1 Hz, 7.7 Hz, 2H), 7.66 (td, *J* = 1.1 Hz, 7.7 Hz, 2H), 7.17 (dd, *J* = 6.8 Hz, 14.9 Hz, 1H), 6.48 (dd, *J* = 1.2 Hz, 14.9 Hz, 1H), 2.24-2.15 (m, 1H), 1.72-1.65 (m, 4H), 1.22-1.14 (m, 3H), 1.14-1.02 (m, 3H). **<sup>13</sup>C NMR** (126 MHz, CDCl<sub>3</sub>) δ 161.3, 135.5, 134.3, 134.0, 130.4, 130.0, 120.8, 107.7, 42.0, 30.8, 25.5, 25.3. **<sup>19</sup>F NMR** (471 MHz, CDCl<sub>3</sub>) δ -150.62 (brs), -150.68 (brs). **HRMS** (ESI-TOF) *m/z*: [M]<sup>+</sup> Calcd for C<sub>20</sub>H<sub>21</sub>S<sub>2</sub><sup>+</sup> 325.1079; Found 325.1086.

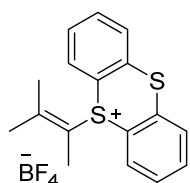

**Compound 1g.** Following **GPA**, the product was prepared and purified by flash column chromatography (eluent: CH<sub>2</sub>Cl<sub>2</sub>/MeOH = 100/1) as a white solid (220 mg, 19%). **<sup>1</sup>H NMR** (500 MHz, CDCl<sub>3</sub>) δ 8.00-7.96 (m, 2H), 7.75-7.67 (m, 6H), 2.54 (d, *J* = 1.4 Hz, 3H), 2.19 (d, *J* = 0.8 Hz, 3H), 2.03 (s, 3H). **<sup>13</sup>C NMR** (126 MHz, CDCl<sub>3</sub>) δ 163.4, 133.6, 133.5, 131.3, 130.4, 129.6, 119.7, 115.0, 24.2, 24.0, 15.9. **<sup>19</sup>F NMR** (471 MHz, CDCl<sub>3</sub>) δ -152.64 (brs), -152.69 (brs). **HRMS** (ESI-TOF) *m/z*: [M]<sup>+</sup> Calcd for C<sub>17</sub>H<sub>17</sub>S<sub>2</sub><sup>+</sup> 285.0766.0923; found 285.0775.

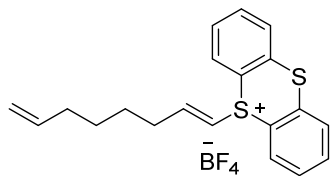

**Compound 1h.** Following **GPA**, the product was prepared and purified by flash column chromatography (eluent: CH<sub>2</sub>Cl<sub>2</sub>/MeOH = 100/1) as a white solid. **<sup>1</sup>H NMR** (500 MHz, CDCl<sub>3</sub>) δ 8.38 (dd, *J* = 1.1 Hz, 7.9 Hz, 2H), 7.82 (dd, *J* = 1.1 Hz, 7.9 Hz, 2H), 7.73 (td, *J* = 1.1 Hz, 7.6 Hz, 2H), 7.68 (td, *J* = 1.1 Hz, 7.6 Hz, 2H), 7.33-7.26 (m, 1H), 6.56 (d, *J* = 14.8 Hz, 1H), 5.75-5.66 (m, 1H), 4.96-4.87 (m, 2H), 2.28-2.21 (m, 2H), 1.98 (q, *J* = 7.1 Hz, 2H), 1.46-1.39 (m, 2H), 1.35-1.28 (m, 2H). **<sup>13</sup>C NMR** (126 MHz, CDCl<sub>3</sub>) δ 157.2, 138.1, 135.4, 134.3, 133.9, 130.3, 129.9, 120.8, 114.9, 109.2, 33.2, 33.1, 28.2, 26.6. **<sup>19</sup>F NMR** (471 MHz, CDCl<sub>3</sub>) δ -150.63 (brs), -150.69 (brs). **HRMS** (ESI-TOF) *m/z*: [M]<sup>+</sup> Calcd for C<sub>20</sub>H<sub>21</sub>S<sub>2</sub><sup>+</sup> 325.1079; Found 325.1072.

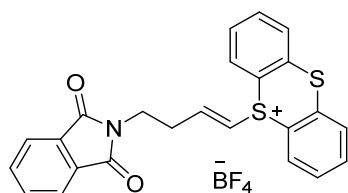

**Compound 1i.** Following **GPA**, the product was

prepared and purified by flash column chromatography (eluent: CH<sub>2</sub>Cl<sub>2</sub>/MeOH = 100/1) as a white solid (1.237 g, 82%). **<sup>1</sup>H NMR** (500 MHz, CDCl<sub>3</sub>) δ 8.26 (dd, *J* = 1.2 Hz, 7.9 Hz, 2H), 7.78-7.64 (m, 10H), 7.03 (dt, *J* = 7.2 Hz, 14.9 Hz, 1H), 6.56 (d, *J* = 14.9 Hz, 1H), 3.76 (t, *J* = 6.7 Hz, 2H), 2.71-2.64 (m, 2H). **<sup>13</sup>C NMR** (126 MHz, CDCl<sub>3</sub>) δ 167.9, 151.0, 135.6, 134.4, 134.2, 134.1, 131.6, 130.3, 130.0, 123.4, 119.7, 111.9, 35.4, 32.2. **<sup>19</sup>F NMR** (471 MHz, CDCl<sub>3</sub>) δ -150.47 (brs), -150.53(brs). **HRMS** (ESI-TOF) *m/z*: [M]<sup>+</sup> Calcd for C<sub>24</sub>H<sub>18</sub>NO<sub>2</sub>S<sub>2</sub><sup>+</sup> 416.0773; Found 416.0780.

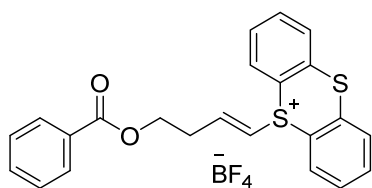

**Compound 1j.** Following **GPA**, the product was

prepared and purified by flash column chromatography (eluent: CH<sub>2</sub>Cl<sub>2</sub>/MeOH = 100/1) as a sticky yellow oil. **<sup>1</sup>H NMR** (500 MHz, CDCl<sub>3</sub>) δ 8.33 (dd, *J* = 1.2 Hz, 7.8 Hz, 2H), 7.83 (dd, *J* = 1.2 Hz, 7.8 Hz, 2H), 7.74-7.66 (m, 4H), 7.63 (td, *J* = 1.4 Hz, 7.5 Hz, 2H), 7.55 (t, *J* = 7.4 Hz, 1H), 7.38 (t, *J* = 7.8 Hz, 2H), 7.25-7.17 (m, 1H), 6.67 (d, *J* = 14.9 Hz, 1H), 4.39 (t, *J* = 6.1 Hz, 2H), 2.75 (q, *J* = 6.1 Hz, 2H). **<sup>13</sup>C NMR** (126 MHz, CDCl<sub>3</sub>) δ 166.0, 151.5, 135.4, 134.3, 133.9, 133.2, 130.3, 129.9, 129.5, 128.4, 120.0, 111.8, 61.4, 32.5. **<sup>19</sup>F NMR** (471 MHz, CDCl<sub>3</sub>) δ -150.33 (brs), -150.38(brs). **HRMS** (ESI-TOF) *m/z*: [M]<sup>+</sup> Calcd for C<sub>23</sub>H<sub>19</sub>O<sub>2</sub>S<sub>2</sub><sup>+</sup> 391.0821; Found 391.0809.

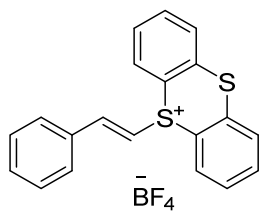

**Compound 1p.** Following **GPB**, the product was prepared

and purified by flash column chromatography (eluent: CH<sub>2</sub>Cl<sub>2</sub>/MeOH = 100/1) as a white solid (877 mg, 72%). **<sup>1</sup>H NMR** (500 MHz, CDCl<sub>3</sub>) δ 8.42 (dd, *J* = 1.3 Hz, 8.0 Hz, 2H), 8.09 (d, *J* = 15.1 Hz, 1H), 7.85 (dd, *J* = 1.3 Hz, 8.0 Hz, 2H), 7.74 (td, *J* = 1.3 Hz, 7.7 Hz, 2H), 7.66 (td, *J* = 1.3 Hz, 7.7 Hz, 2H), 7.51-7.47 (m, 2H), 7.42-7.36 (m, 1H) 7.33 (t, *J* = 7.5 Hz, 2H), 7.11 (d, *J* = 15.1 Hz, 1H). **<sup>13</sup>C NMR** (126 MHz, CDCl<sub>3</sub>) δ 151.8, 135.6, 134.4, 133.9, 132.3, 132.0, 130.4, 130.0, 129.1, 129.0, 120.9, 106.1. **<sup>19</sup>F NMR** (471 MHz, CDCl<sub>3</sub>) δ -150.12 (brs), -150.17 (d, *J* = 1.6 Hz). **HRMS** (ESI-TOF) *m/z*: [M]<sup>+</sup> Calcd for C<sub>20</sub> H<sub>15</sub> S<sub>2</sub><sup>+</sup> 319.061; Found 319.0599.

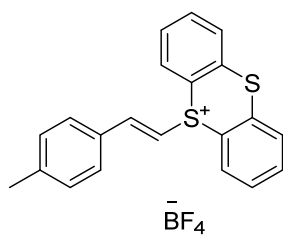

**Compound 1q.** Following **GPB**, the product was prepared and purified by flash column chromatography (eluent: CH<sub>2</sub>Cl<sub>2</sub>/MeOH = 100/1) as a pale-yellow solid (857 mg, 68%). **<sup>1</sup>H NMR** (500 MHz, CDCl<sub>3</sub>) δ 8.36 (dd, *J* = 1.2 Hz, 7.9 Hz, 2H), 8.05 (d, *J* = 15.1 Hz, 1H), 7.77 (dd, *J* = 1.2 Hz, 7.9 Hz, 2H), 7.65 (td, *J* = 1.3 Hz, 7.7 Hz, 2H), 7.59 (td, *J* = 1.3 Hz, 7.7 Hz, 2H), 7.33 (d, *J* = 8.1 Hz, 2H), 7.07 (d, *J* = 8.1 Hz, 2H), 6.99 (d, *J* = 15.1 Hz, 1H), 2.26 (s, 3H). **<sup>13</sup>C NMR** (126 MHz, CDCl<sub>3</sub>) δ 152.2, 143.4, 135.6, 134.2, 133.8, 130.4, 129.9, 129.9, 129.4, 129.1, 121.3, 104.3, 21.6. **<sup>19</sup>F NMR** (471 MHz, CDCl<sub>3</sub>) δ -150.28 (brs), -150.34 (d, *J* = 1.1 Hz). **HRMS** (ESI-TOF) *m/z*: [M]<sup>+</sup> Calcd for C<sub>21</sub> H<sub>17</sub> S<sub>2</sub><sup>+</sup> 333.0766; Found 333.0758.

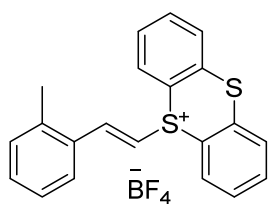

**Compound 1r.** Following **GPB**, the product was prepared and purified by flash column chromatography (eluent: CH<sub>2</sub>Cl<sub>2</sub>/MeOH = 100/1) as a pale-yellow solid (756 mg, 60%). **<sup>1</sup>H NMR** (500 MHz, CDCl<sub>3</sub>) δ 8.49 (dd, *J* = 1.2 Hz, 7.9 Hz, 2H), 8.09 (d, *J* = 15.0 Hz, 1H), 7.84 (dd, *J* = 1.2 Hz, 7.9 Hz, 2H), 7.74 (td, *J* = 1.3 Hz, 7.6 Hz, 2H), 7.68 (td, *J* = 1.3 Hz, 7.6 Hz, 2H), 7.36 (d, *J* = 7.8 Hz, 1H), 7.31-7.26 (m, 1H) 7.18 (d, *J* = 7.6 Hz, 1H), 7.12 (t, *J* = 7.6 Hz, 1H), 7.05 (d, *J* = 15.0 Hz, 1H). **<sup>13</sup>C NMR** (126 MHz, CDCl<sub>3</sub>) δ 149.3, 139.5, 135.6, 134.3, 134.0, 132.1, 131.3, 131.1, 130.4, 130.0, 126.8, 126.4, 121.0, 106.7, 19.6. **<sup>19</sup>F NMR** (471 MHz, CDCl<sub>3</sub>) δ -150.07 (brs), -150.12 (brs). **HRMS** (ESI-TOF) *m/z*: [M]<sup>+</sup> Calcd for C<sub>21</sub>H<sub>17</sub>S<sub>2</sub><sup>+</sup> 333.0766; Found 333.0756.

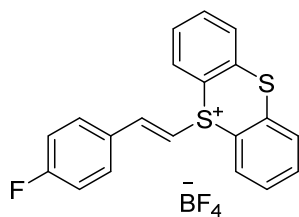

**Compound 1s.** Following **GPB**, the product was prepared and purified by flash column chromatography (eluent: CH<sub>2</sub>Cl<sub>2</sub>/MeOH = 100/1) as a pale-yellow solid (952 mg, 75%). **<sup>1</sup>H NMR** (500 MHz, CDCl<sub>3</sub>) δ 8.45 (dd, *J* = 1.3 Hz, 7.9 Hz, 2H), 8.18 (d, *J* = 15.2 Hz, 1H), 7.85 (dd, *J* = 1.3 Hz, 7.9 Hz, 2H),

7.74 (td,  $J = 1.4$  Hz, 7.6 Hz, 2H), 7.66 (td,  $J = 1.4$  Hz, 7.6 Hz, 2H), 7.57-7.52 (m, 2H), 7.08-7.00 (m, 3H).  $^{13}\text{C}$  NMR (126 MHz,  $\text{CDCl}_3$ )  $\delta$  151.0, 135.6, 134.3, 134.0, 131.4, 131.37, 130.5, 130.0, 128.4, 121.1, 116.6, 116.4.  $^{19}\text{F}$  NMR (471 MHz,  $\text{CDCl}_3$ )  $\delta$  -105.26 (m), -150.03 (brs), -150.09 (brs). HRMS (ESI-TOF)  $m/z$ :  $[\text{M}]^+$  Calcd for  $\text{C}_{20}\text{H}_{14}\text{F}\text{S}_2^+$  337.0515; Found 337.0523.

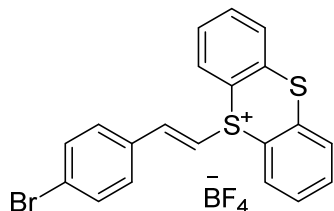

**Compound 1t.** Following **GPB**, the product was

prepared and purified by flash column chromatography (eluent:  $\text{CH}_2\text{Cl}_2/\text{MeOH} = 100/1$ ) as a pale-yellow solid (972 mg, 67%).  $^1\text{H}$  NMR (500 MHz,  $\text{CDCl}_3$ )  $\delta$  8.37 (dd,  $J = 1.1$  Hz, 8.0 Hz, 2H), 8.01 (d,  $J = 15.1$  Hz, 1H), 7.85 (dd,  $J = 1.1$  Hz, 8.0 Hz, 2H), 7.74 (td,  $J = 1.2$  Hz, 7.7 Hz, 2H), 7.66 (td,  $J = 1.2$  Hz, 7.7 Hz, 2H), 7.43 (d,  $J = 8.6$  Hz, 2H), 7.37 (d,  $J = 8.6$  Hz, 2H), 7.12 (d,  $J = 15.1$  Hz, 1H).  $^{13}\text{C}$  NMR (126 MHz,  $\text{CDCl}_3$ )  $\delta$  150.3, 135.7, 134.5, 133.8, 132.3, 131.0, 130.4, 130.2, 126.9, 120.4, 107.0.  $^{19}\text{F}$  NMR (471 MHz,  $\text{CDCl}_3$ )  $\delta$  -149.89 (brs), -149.94 (brs). HRMS (ESI-TOF)  $m/z$ :  $[\text{M}]^+$  Calcd for  $\text{C}_{20}\text{H}_{14}\text{BrS}_2^+$  396.9715; Found 396.9710.

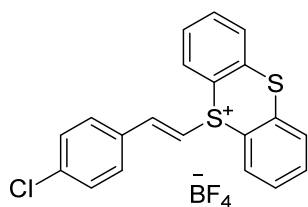

**Compound 1u.** Following **GPB**, the product was prepared

and purified by flash column chromatography (eluent:  $\text{CH}_2\text{Cl}_2/\text{MeOH} = 100/1$ ) as a pale-yellow solid (850 mg, 64%).  $^1\text{H}$  NMR (500 MHz,  $\text{CDCl}_3$ )  $\delta$  8.34 (dd,  $J = 1.3$  Hz, 7.9 Hz, 2H), 8.01 (d,  $J = 15.2$  Hz, 1H), 7.78 (dd,  $J = 1.3$  Hz, 7.9 Hz, 2H), 7.68 (td,  $J = 1.3$  Hz, 7.7 Hz, 2H), 7.61 (td,  $J = 1.3$  Hz, 7.7 Hz, 2H), 7.38 (d,  $J = 8.6$  Hz, 2H), 7.22 (d,  $J = 8.6$  Hz, 2H), 7.03 (d,  $J = 15.2$  Hz, 1H).  $^{13}\text{C}$  NMR (126 MHz,  $\text{CDCl}_3$ )  $\delta$  150.4, 138.5, 135.7, 134.4, 133.9, 130.6, 130.4, 130.3, 130.1, 129.4, 120.6, 106.7.  $^{19}\text{F}$  NMR (471 MHz,  $\text{CDCl}_3$ )  $\delta$  -149.93 (brs), -149.98 (brs). HRMS (ESI-TOF)  $m/z$ :  $[\text{M}]^+$  Calcd for  $\text{C}_{20}\text{H}_{14}\text{ClS}_2^+$  353.0220; Found 353.0219.

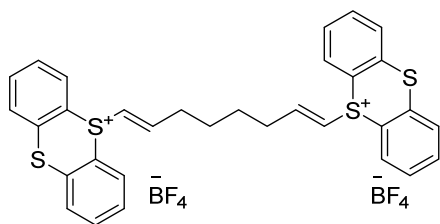

**Compound 1w.** Prepared from octa-1,7-diene

(330mg, 3.00 mmol, 1.00 equiv), thianthrene S-oxide (1) (1.44 g, 6.18 mmol, 2.06 equiv), trifluoroacetic anhydride (2.52 mL, 3.78 g, 18.00 mmol, 6.00 equiv) and HOTf (1.25 mL, 2.12 g, 14.40 mmol, 4.80 equiv), according to GPA and purified by flash column chromatography (eluent: CH<sub>2</sub>Cl<sub>2</sub>/MeOH = 100/1) as a white solid (1.35g, 63%). **<sup>1</sup>H NMR** (500 MHz, CDCl<sub>3</sub>) δ 8.26 (dd, *J* = 1.2 Hz, 7.9 Hz, 2H), 7.84 (dd, *J* = 1.2 Hz, 7.9 Hz, 2H), 7.73 (td, *J* = 1.3 Hz, 7.7 Hz, 2H), 7.66 (td, *J* = 1.3 Hz, 7.7 Hz, 2H), 7.14 (dt, *J* = 7.2 Hz, 14.8 Hz, 1H), 6.58 (d, *J* = 14.8 Hz, 1H), 2.28-2.22 (m, 2H), 1.46-1.41 (m, 2H). **<sup>13</sup>C NMR** (126 MHz, CDCl<sub>3</sub>) δ 156.8, 135.6, 134.3, 133.3, 130.2, 120.6, 109.7, 32.7, 26.1. **<sup>19</sup>F NMR** (471 MHz, CDCl<sub>3</sub>) δ -150.63 (brs), -150.68 (brs). **HRMS** (ESI-TOF) *m/z*: [M]<sup>2+</sup> Calcd for C<sub>32</sub>H<sub>28</sub>S<sub>4</sub><sup>2+</sup> 270.0531; Found 270.0528

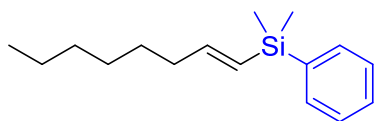

**Compound 3a** (CAS: 116488-00-7, known

compound)<sup>2</sup>. Following **GPC**, the product was prepared and purified by flash column chromatography (eluent: petroleum ether) as a yellow oil (24.3 mg, 95%). **<sup>1</sup>H NMR** (500 MHz, CDCl<sub>3</sub>) δ 7.55-7.51 (m, 2H), 7.37-7.33 (m, 3H), 6.13 (dt, *J* = 6.3 Hz, 18.6 Hz, 1H), 5.76 (dt, *J* = 1.4 Hz, 18.6 Hz, 1H), 2.19-2.12 (m, 2H), 1.44-1.38 (m, 2H), 1.34-1.28 (m, 6H), 0.89 (t, *J* = 6.9 Hz, 3H), 0.33 (s, 6H). **<sup>13</sup>C NMR** (126 MHz, CDCl<sub>3</sub>) δ 149.5, 139.4, 133.8, 128.8, 127.7, 127.2, 36.9, 31.7, 28.9, 28.6, 22.6, 14.1, -2.4.

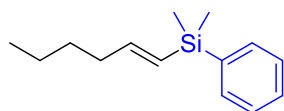

**Compound 3b** (CAS: 64545-10-4, known compound)<sup>3</sup>.

Following **GPC**, the product was prepared and purified by flash column chromatography (eluent: petroleum ether) as a yellow oil (16.1 mg, 74%). **<sup>1</sup>H NMR** (500 MHz, CDCl<sub>3</sub>) δ 7.55-7.51 (m, 2H), 7.38-7.33 (m, 3H), 6.13 (dt, *J* = 6.3 Hz, 18.6 Hz, 1H), 5.76 (dt, *J* = 1.5 Hz, 18.6 Hz, 1H), 2.20-2.12 (m, 2H), 1.45-1.37 (m, 2H), 1.37-1.30 (m, 2H), 0.91 (t, *J* = 7.2 Hz, 3H), 0.32 (s, 6H). **<sup>13</sup>C NMR** (126 MHz, CDCl<sub>3</sub>) δ 149.5, 139.4, 133.8, 128.8, 127.7, 127.2, 36.5, 30.8, 22.3, 14.0, -2.4.

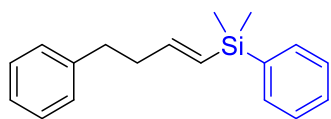

**Compound 3c (CAS: 852064-26-7, known compound)**<sup>4</sup>.

Following **GPC**, the product was prepared as a colorless oil (21.3 mg, 80%). **<sup>1</sup>H NMR** (500 MHz, CDCl<sub>3</sub>) δ 7.51-7.48 (m, 2H), 7.37-7.34 (m, 3H), 7.31-7.27 (m, 2H), 7.23-7.17 (m, 3H), 6.17 (dt, *J* = 6.2 Hz, 18.6 Hz, 1H), 5.80 (dt, *J* = 1.5 Hz, 18.6 Hz, 1H), 2.75 (t, *J* = 7.8 Hz, 2H), 2.52-2.45 (m, 2H), 0.32 (s, 6H). **<sup>13</sup>C NMR** (126 MHz, CDCl<sub>3</sub>) δ 148.1, 141.9, 139.1, 133.8, 128.8, 128.5, 128.3, 128.2, 127.7, 125.8, 38.5, 35.1, -2.5.

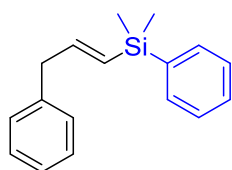

**Compound 3d (CAS: 773121-40-7, known compound)**<sup>2</sup>.

Following **GPC**, the product was prepared as a colorless oil (20.2 mg, 80%). **<sup>1</sup>H NMR** (500 MHz, CDCl<sub>3</sub>) δ 7.54-7.50 (m, 2H), 7.37-7.33 (m, 3H), 7.32-7.28 (m, 2H), 7.23-7.17 (m, 3H), 6.25 (dt, *J* = 6.3 Hz, 18.4 Hz, 1H), 5.84 (dt, *J* = 1.4 Hz, 18.4 Hz, 1H), 3.50 (d, *J* = 6.1 Hz, 2H), 0.33 (s, 6H). **<sup>13</sup>C NMR** (126 MHz, CDCl<sub>3</sub>) δ 147.1, 139.8, 139.0, 133.8, 129.2, 128.9, 128.7, 128.4, 127.7, 126.1, 43.3, -2.5.

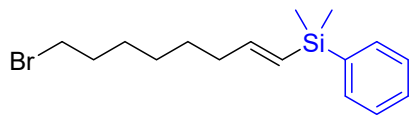

**Compound 3e.** Following **GPC**, the product was

prepared as a colorless oil (29.2 mg, 90%). **<sup>1</sup>H NMR** (500 MHz, CDCl<sub>3</sub>) δ 7.54-7.50 (m, 2H), 7.37-7.33 (m, 3H), 6.11 (dt, *J* = 6.2 Hz, 18.5 Hz, 1H), 5.76 (d, *J* = 18.5 Hz, 1H), 3.41 (d, *J* = 6.9 Hz, 2H), 2.19-2.12 (m, 2H), 1.90-1.82 (m, 2H), 1.49-1.40 (m, 4H), 1.36-1.30 (m, 2H), 0.32 (s, 6H). **<sup>13</sup>C NMR** (126 MHz, CDCl<sub>3</sub>) δ 149.0, 139.3, 133.8, 128.8, 127.7, 127.5, 36.6, 33.9, 32.7, 28.3, 28.3, 28.0, -2.5. **HRMS** (ESI-TOF) *m/z*: [M+Na]<sup>+</sup> Calcd for C<sub>16</sub>H<sub>25</sub>BrSi Na<sup>+</sup> 347.0801; Found 347.0799.

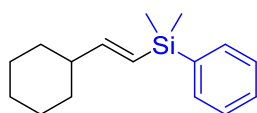

**Compound 3f (CAS: 148991-59-7, known compound)**<sup>2</sup>.

Following **GPC**, the product was prepared and purified by flash column chromatography (eluent: petroleum ether) as a yellow oil (21.1 mg, 86%). **<sup>1</sup>H NMR** (500 MHz, CDCl<sub>3</sub>) δ 7.54-7.50 (m, 2H), 7.38-7.33 (m, 3H), 6.09 (dd, *J* = 6.0 Hz, 18.8 Hz, 1H), 5.71 (dd, *J* = 1.4 Hz, 18.8 Hz, 1H), 2.06-1.97 (m, 1H), 1.80-1.70 (m, 4H), 1.69-1.62 (m, 1H), 1.34-1.25 (m, 2H), 1.21-1.08 (m, 3H), 0.32 (s,



6H).  $^{13}\text{C}$  NMR (126 MHz,  $\text{CDCl}_3$ )  $\delta$  154.9, 139.5, 133.8, 128.7, 127.7, 123.8, 44.0, 32.3, 26.2, 26.0, -2.4.

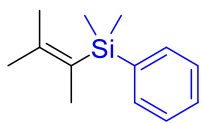

**Compound 3g** (CAS: 129156-01-0, known compound)<sup>5</sup>.

Following **GPC**, the product was prepared and purified by flash column chromatography (eluent: petroleum ether) as a yellow oil (6.5 mg, 32%).  $^1\text{H}$  NMR (500 MHz,  $\text{CDCl}_3$ )  $\delta$  7.52-7.49 (m, 2H), 7.34-7.31 (m, 3H), 1.76 (s, 3H), 1.71 (s, 3H), 1.70 (s, 3H), 0.37 (s, 6H).

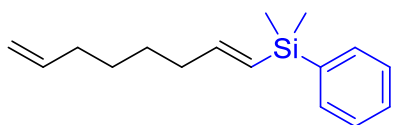

**Compound 3h**. Following **GPC**, the product was

prepared and purified by flash column chromatography (eluent: petroleum ether) as a colorless oil (18.8 mg, 77%).  $^1\text{H}$  NMR (500 MHz,  $\text{CDCl}_3$ )  $\delta$  7.55-7.49 (m, 2H), 7.37-7.33 (m, 3H), 6.12 (dt,  $J$  = 6.3 Hz, 18.5 Hz, 1H), 5.86-5.73 (m, 2H), 5.00 (dd,  $J$  = 1.5 Hz, 17.1 Hz, 1H), 4.94 (d,  $J$  = 10.2 Hz, 1H), 2.19-2.13 (m, 2H), 1.90-1.82 (m, 2H), 1.49-1.40 (m, 4H), 1.36-1.30 (m, 2H), 0.32 (s, 6H).  $^{13}\text{C}$  NMR (126 MHz,  $\text{CDCl}_3$ )  $\delta$  149.0, 139.3, 133.8, 128.8, 127.7, 127.5, 36.6, 33.9, 32.7, 28.3, 28.3, 28.0, -2.5. **HRMS** (ESI-TOF)  $m/z$ :  $[\text{M}+\text{Na}]^+$  Calcd for  $\text{C}_{16}\text{H}_{24}\text{Si Na}^+$  267.1539; Found 267.1530.

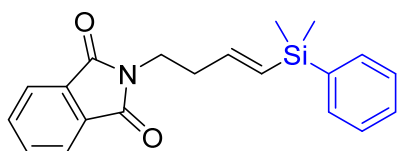

**Compound 3i** (CAS: 1138502-22-3, known

compound)<sup>6</sup>. According to **GPC** at 25 °C in DCM (1 mL) for 2 h. The product was prepared and purified by flash column chromatography (eluent: EtOAc/petroleum ether = 1/20) as a colorless oil (26.1 mg, 78%).  $^1\text{H}$  NMR (500 MHz,  $\text{CDCl}_3$ )  $\delta$  7.84-7.81 (m, 2H), 7.72-7.69 (m, 3H), 7.42-7.38 (m, 2H), 7.32-7.29 (m, 1H), 7.28-7.24 (m, 1H), 6.07 (dt,  $J$  = 6.6 Hz, 18.5 Hz, 1H), 5.79 (dt,  $J$  = 1.2 Hz, 18.5 Hz, 1H), 3.80 (t,  $J$  = 7.0 Hz, 2H), 2.57-2.51 (m, 2H), 0.24 (s, 6H).  $^{13}\text{C}$  NMR (126 MHz,  $\text{CDCl}_3$ )  $\delta$  168.3, 144.2, 138.5, 133.8, 133.7, 132.0, 131.6, 128.8, 127.6, 123.1, 37.0, 35.6, -2.8.

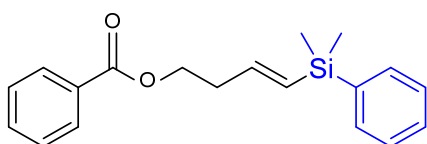

**Compound 3j**. Following **GPC**, the product was

prepared and purified by flash column chromatography (eluent:

EtOAc/petroleum ether = 1/20) as a yellow oil (14.6 mg, 47%). **<sup>1</sup>H NMR** (500 MHz, CDCl<sub>3</sub>) δ 8.73 (dd, *J* = 1.1 Hz, 8.2 Hz, 2H), 7.59-7.54 (m, 1H), 7.52-7.48 (m, 2H), 7.43 (t, *J* = 7.8 Hz, 2H), 7.37-7.29 (m, 3H), 6.16 (dt, *J* = 6.3 Hz, 18.6 Hz, 1H), 5.96 (dt, *J* = 1.3 Hz, 18.6 Hz, 1H), 4.42 (t, *J* = 6.7 Hz, 2H), 2.73 (qd, *J* = 1.3 Hz, 6.6 Hz, 2H), 0.33 (s, 6H). **<sup>13</sup>C NMR** (126 MHz, CDCl<sub>3</sub>) δ 166.5, 143.7, 138.7, 133.8, 132.8, 131.3, 130.4, 129.5, 128.9, 128.3, 127.7, 63.6, 36.0, -2.7. **HRMS** (ESI-TOF) *m/z*: [M+Na]<sup>+</sup> Calcd for C<sub>19</sub>H<sub>22</sub>O<sub>2</sub>SiNa<sup>+</sup> 333.1281; Found 333.1275.

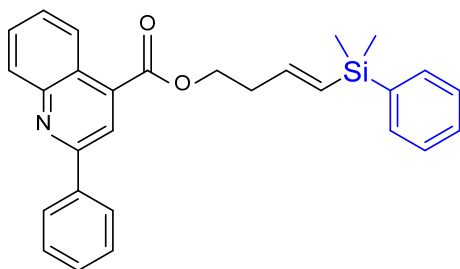

**Compound 3k.** Following **GPC**, the product was prepared and purified by flash column chromatography (eluent: EtOAc/petroleum ether = 1/20) as a yellow solid (20.5 mg, 47%). **<sup>1</sup>H NMR** (500 MHz, CDCl<sub>3</sub>) δ 8.73 (d, *J* = 8.5 Hz, 1H), 8.38 (s, 1H), 8.24 (d, *J* = 8.5 Hz, 1H), 8.18 (d, *J* = 7.2 Hz, 2H), 7.80-7.75 (m, 1H), 7.62-7.57 (m, 1H), 7.56-7.52 (m, 2H), 7.51-7.46 (m, 3H), 7.32-7.24 (m, 3H), 6.21 (dt, *J* = 6.2 Hz, 18.6 Hz, 1H), 6.03 (d, *J* = 18.6 Hz, 1H), 4.59 (t, *J* = 6.6 Hz, 2H), 2.73 (qd, *J* = 0.91 Hz, 6.5 Hz, 2H), 0.34 (s, 6H). **<sup>13</sup>C NMR** (126 MHz, CDCl<sub>3</sub>) δ 166.5, 156.8, 149.3, 143.4, 138.9, 138.5, 135.9, 133.8, 131.8, 130.4, 129.9, 129.7, 129.0, 128.97, 127.8, 127.77, 127.5, 125.5, 124.0, 120.3, 64.6, 36.0, -2.6. **HRMS** (ESI-TOF) *m/z*: [M+H]<sup>+</sup> Calcd for C<sub>28</sub>H<sub>28</sub>NO<sub>2</sub>Si<sup>+</sup> 438.1884; Found 438.1889.

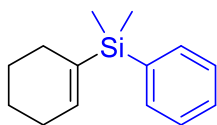

**Compound 3l (CAS: 108025-34-9, known compound)**<sup>2</sup>. Following **GPC**, the product was prepared and purified by flash column chromatography (eluent: petroleum ether) as yellow oil (18.2 mg, 84%). **<sup>1</sup>H NMR** (500 MHz, CDCl<sub>3</sub>) δ 7.53-7.48 (m, 2H), 7.37-7.32 (m, 3H), 6.07-6.05 (m, 1H), 2.10-1.98 (m, 4H), 1.64-1.58 (m, 4H), 0.31 (s, 6H). **<sup>13</sup>C NMR** (126 MHz, CDCl<sub>3</sub>) δ 138.8, 137.9, 136.7, 134.0, 128.7, 127.6, 26.9, 26.8, 22.9, 22.4, -3.6.

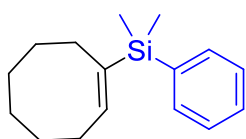

**Compound 3m.** Following **GPC**, the product was prepared and purified by flash column chromatography (eluent: petroleum ether) as a

colorless oil (12.9 mg, 53%). **<sup>1</sup>H NMR** (500 MHz, CDCl<sub>3</sub>) δ 7.55-7.50 (m, 2H), 7.37-7.32 (m, 3H), 6.06 (t, *J* = 6.9Hz, 1H), 2.29-2.25 (m, 2H), 2.25-2.20 (m, 2H), 1.51-1.34 (m, 8H), 0.35 (s, 6H). **<sup>13</sup>C NMR** (126 MHz, CDCl<sub>3</sub>) δ 141.7, 140.2, 139.1, 134.0, 128.7, 127.6, 29.7, 28.9, 27.5, 27.0, 26.4, 26.1, -2.9. **HRMS** (ESI-TOF) *m/z*: [M+Na]<sup>+</sup> Calcd for C<sub>16</sub>H<sub>24</sub>Si Na<sup>+</sup> 267.1539; Found 267.1539.

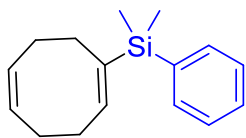

**Compound 3n.** According to **GPC** at 50 °C in DCM (1 mL) for 2 h. The product was prepared and purified by flash column chromatography (eluent: petroleum ether) as a colorless oil (13.6 mg, 56%). **<sup>1</sup>H NMR** (500 MHz, CDCl<sub>3</sub>) δ 7.53-7.49 (m, 2H), 7.37-7.32 (m, 3H), 6.01 (t, *J* = 6.0Hz, 1H), 5.62-5.54 (m, 1H), 5.52-5.45(m, 1H), 2.50-2.43 (m, 4H), 2.42-2.35 (m, 2H), 2.27-2.20 (m, 2H), 0.31 (s, 6H). **<sup>13</sup>C NMR** (126 MHz, CDCl<sub>3</sub>) δ 139.8, 139.1, 138.3, 134.1, 128.9, 128.7, 128.5, 127.6, 30.8, 29.0, 29.0, 27.6, -2.90. **HRMS** (ESI-TOF) *m/z*: [M+H]<sup>+</sup> Calcd for C<sub>16</sub>H<sub>23</sub>Si + 243.1564; Found 243.1559.

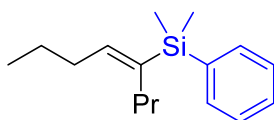

**Compound E-3o (CAS: 191798-74-0, known compound)**<sup>7</sup>. Following **GPC**, the product was prepared and purified by flash column chromatography (eluent: petroleum ether) as a colorless oil (19.9 mg, 81%). **<sup>1</sup>H NMR** (500 MHz, CDCl<sub>3</sub>) δ 7.53-7.49 (m, 2H), 7.36-7.32 (m, 3H), 5.82 (t, *J* = 6.9 Hz, 1H), 2.15-2.06 (m, 4H), 1.41 (q, *J* = 7.4 Hz, 2H), 1.23 (q, *J* = 7.6, 2H), 0.92 (t, *J* = 7.4 Hz, 3H), 0.83 (t, *J* = 7.3 Hz, 3H), 0.34 (s, 6H). **<sup>13</sup>C NMR** (126 MHz, CDCl<sub>3</sub>) δ 142.7, 139.5, 138.9, 134.0, 128.6, 127.6, 32.1, 30.7, 23.4, 22.7, 14.4, 13.9, -2.5.

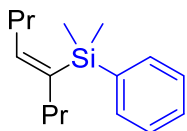

**Compound Z-3o (CAS: 873663-95-7, known compound)**<sup>7</sup>. Following the general procedure, the product was prepared and purified by flash column chromatography (eluent: petroleum ether) as a colorless oil (14.3 mg, 58%). **<sup>1</sup>H NMR** (500 MHz, CDCl<sub>3</sub>) δ 7.55-7.51 (m, 2H), 7.35-7.31 (m, 3H), 6.07 (t, *J* = 7.5 Hz, 1H), 2.11-2.06 (m, 2H), 1.93 (dd, *J* = 7.4 Hz, 14.8 Hz, 2H), 1.39-1.33 (m, 2H), 1.26-1.22 (m, 2H), 0.87 (t, *J* = 7.3 Hz, 3H), 0.75 (t, *J* = 7.4 Hz, 3H), 0.38 (s, 6H). **<sup>13</sup>C NMR** (126 MHz, CDCl<sub>3</sub>) δ 144.7, 140.1, 136.8, 133.8, 128.6, 127.6, 40.7, 34.4, 24.0, 22.9, 13.8, 13.7, -0.8.

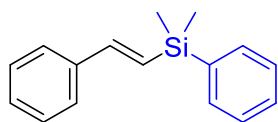

**Compound 3p (CAS: 64788-85-8, known compound)<sup>2</sup>.**

Following **GPC**, the product was prepared as a colorless oil (19.0 mg, 80%). **<sup>1</sup>H NMR** (500 MHz, CDCl<sub>3</sub>) δ 7.59-7.55 (m, 2H), 7.46-7.43 (m, 2H), 7.38-7.35 (m, 3H), 7.34-7.30 (m, 2H), 7.26-7.23 (m, 1H), 6.94 (d, *J* = 19.1 Hz, 1H), 6.58 (d, *J* = 19.1 Hz, 1H), 0.43 (s, 6H). **<sup>13</sup>C NMR** (126 MHz, CDCl<sub>3</sub>) δ 145.3, 138.6, 138.2, 133.9, 129.0, 128.5, 128.2, 127.8, 127.1, 126.5, -2.5.

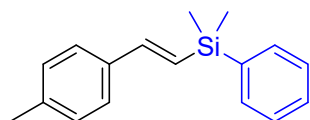

**Compound 3q (CAS: 264189-27-7, known compound)<sup>2</sup>.**

Following **GPC**, the product was prepared as a colorless oil (24.9 mg, 99%). **<sup>1</sup>H NMR** (500 MHz, CDCl<sub>3</sub>) δ 7.60-7.57 (m, 2H), 7.50-7.39 (m, 5H), 7.14 (d, *J* = 7.9 Hz, 2H), 6.92 (d, *J* = 19.1 Hz, 1H), 6.53 (d, *J* = 19.1 Hz, 1H), 2.35 (s, 3H), 0.43 (s, 6H). **<sup>13</sup>C NMR** (126 MHz, CDCl<sub>3</sub>) δ 145.2, 138.8, 138.1, 135.5, 133.9, 129.2, 129.0, 127.8, 126.4, 125.7, 21.2, -2.5.

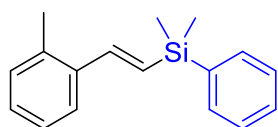

**Compound 3r (CAS: 1440971-96-9, known compound)<sup>3</sup>.**

Following **GPC**, the product was prepared as a colorless oil (23.2 mg, 92%). **<sup>1</sup>H NMR** (500 MHz, CDCl<sub>3</sub>) δ 7.59-7.55 (m, 2H), 7.55-7.51 (m, 1H), 7.40-7.37 (m, 3H), 7.23-7.12 (m, 4H), 6.49 (d, *J* = 19.0 Hz, 1H), 2.36 (s, 3H), 0.44 (s, 6H). **<sup>13</sup>C NMR** (126 MHz, CDCl<sub>3</sub>) δ 143.1, 138.7, 137.5, 135.4, 133.9, 130.3, 129.0, 128.9, 127.9, 127.8, 126.1, 125.4, 19.6, -2.5.

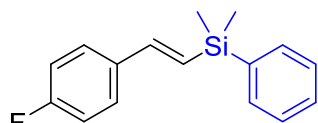

**Compound 3s (CAS: 264189-28-8, known compound)<sup>2</sup>.**

Following **GPC**, the product was prepared as a colorless oil (21.5 mg, 84%). **<sup>1</sup>H NMR** (500 MHz, CDCl<sub>3</sub>) δ 7.59-7.55 (m, 2H), 7.44-7.36 (m, 5H), 7.02 (t, *J* = 8.7 Hz, 2H), 6.90 (d, *J* = 19.1 Hz, 1H), 6.50 (d, *J* = 19.1 Hz, 1H), 0.44 (s, 6H). **<sup>13</sup>C NMR** (126 MHz, CDCl<sub>3</sub>) δ 162.7 (d, *J* = 247.5 Hz), 143.9, 138.4, 134.4 (d, *J* = 3.3 Hz), 133.9, 129.1, 128.0 (d, *J* = 8.1 Hz), 127.8, 126.9 (d, *J* = 2.2 Hz), 115.4 (d, *J* = 21.6 Hz), -2.6. **<sup>19</sup>F NMR** (471 MHz, CDCl<sub>3</sub>) δ -113.72 (m).

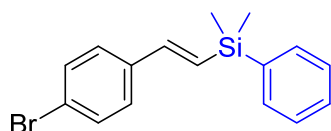

**Compound 3t (CAS: 264189-30-2, known compound)<sup>2</sup>.**

Following **GPC**, the product was prepared as a colorless oil (30.3 mg, 96%). **<sup>1</sup>H NMR** (500 MHz, CDCl<sub>3</sub>) δ 7.59-7.55 (m, 2H), 7.45 (d, *J* = 8.5 Hz, 2H), 7.40-7.36 (m, 3H), 7.31 (d, *J* = 8.5 Hz, 2H), 6.87 (d, *J* = 19.1 Hz, 1H), 6.58 (d, *J* = 19.1 Hz, 1H), 0.44 (s, 6H). **<sup>13</sup>C NMR** (126 MHz, CDCl<sub>3</sub>) δ 143.9, 138.2, 137.1, 133.9, 131.6, 129.1, 128.3, 128.0, 127.9, 122.0, -2.6.

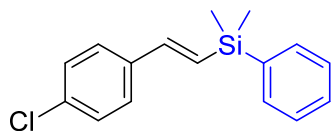

**Compound 3u (CAS: 264189-29-9, known compound)<sup>2</sup>.**

Following **GPC**, the product was prepared as a colorless oil (26.9 mg, 99%). **<sup>1</sup>H NMR** (500 MHz, CDCl<sub>3</sub>) δ 7.58-7.55 (m, 2H), 7.40-7.35 (m, 5H), 7.29 (d, *J* = 8.5 Hz, 2H), 6.88 (d, *J* = 19.1 Hz, 1H), 6.56 (d, *J* = 19.1 Hz, 1H), 0.44 (s, 6H). **<sup>13</sup>C NMR** (126 MHz, CDCl<sub>3</sub>) δ 143.8, 138.3, 136.6, 133.9, 133.8, 129.1, 128.7, 128.1, 127.9, 127.7, -2.6.

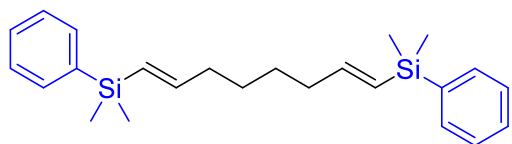

**Compound 3w (CAS: 461047-17-6, known compound)<sup>8</sup>.**

According to general procedure and prepared as a colorless oil (35.5 mg, 94%). **<sup>1</sup>H NMR** (500 MHz, CDCl<sub>3</sub>) δ 7.56-7.52 (m, 2H), 7.38-7.33 (m, 3H), 7.32-7.28 (m, 2H), 6.13 (dt, *J* = 6.2 Hz, 18.6 Hz, 1H), 5.78 (d, *J* = 18.6 Hz, 1H), 2.20-2.15 (m, 2H), 1.4-1.42 (m, 2H), 0.34 (s, 6H). **<sup>13</sup>C NMR** (126 MHz, CDCl<sub>3</sub>) δ 149.2, 139.3, 133.8, 128.8, 127.7, 127.4, 36.6, 28.2, -2.4.

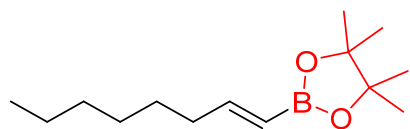

**Compound 5a (CAS: 83947-55-1, known compound)<sup>9</sup>.**

Following **GPD**, the product was prepared and purified by flash column chromatography (eluent: EtOAc/petroleum ether = 1/20) as a yellow oil (21.4 mg, 90%). **<sup>1</sup>H NMR** (500 MHz, CDCl<sub>3</sub>) δ 6.63 (dt, *J* = 6.4 Hz, 18.0 Hz, 1H), 5.42 (dt, *J* = 1.5 Hz, 18.0 Hz, 1H), 2.17-2.11 (m, 2H), 1.44-1.37 (m, 2H), 1.30-1.24 (m, 18H), 0.87 (t, *J* = 7.0 Hz, 3H). **<sup>13</sup>C NMR** (126 MHz, CDCl<sub>3</sub>) δ 154.8, 83.0, 35.8, 31.7, 28.9, 28.2, 24.8, 22.58, 14.1.

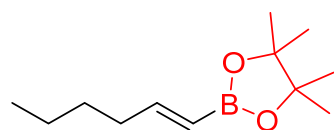

**Compound 5b (CAS: 154820-94-7, known compound)<sup>9</sup>.**

Following **GPD**, the product was prepared and purified by flash column chromatography (eluent: EtOAc/petroleum ether = 1/20) as a yellow oil (15.1 mg,

72%). **<sup>1</sup>H NMR** (500 MHz, CDCl<sub>3</sub>) δ 6.63 (dt, *J* = 6.4 Hz, 18.0 Hz, 1H), 5.42 (d, *J* = 18.0 Hz, 1H), 2.18-2.12 (m, 2H), 1.43-1.36 (m, 2H), 1.34-1.29 (m, 3H), 1.26 (s, 12H), 0.88 (t, *J* = 7.2 Hz, 3H). **<sup>13</sup>C NMR** (126 MHz, CDCl<sub>3</sub>) δ 154.8, 83.0, 35.5, 30.3, 24.8, 22.2, 13.9.

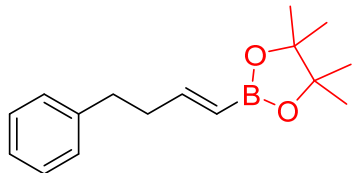

**Compound 5c (CAS: 172512-84-4**, known compound)<sup>10</sup>. Following **GPD**, the product was prepared and purified by flash column chromatography (eluent: EtOAc/petroleum ether = 1/20) as a colorless oil (14.7 mg, 57%). **<sup>1</sup>H NMR** (500 MHz, CDCl<sub>3</sub>) δ 7.30-7.5 (m, 2H), 7.21-7.15 (m, 3H), 6.70 (dt, *J* = 6.2 Hz, 18.0 Hz, 1H), 5.50 (d, *J* = 18.0 Hz, 1H), 2.74 (t, *J* = 8.0 Hz, 2H), 2.50-2.44 (m, 2H), 1.27 (s, 12H). **<sup>13</sup>C NMR** (126 MHz, CDCl<sub>3</sub>) δ 153.4, 141.8, 128.3, 125.8, 83.1, 37.5, 34.6, 24.8.

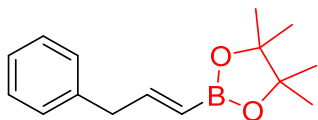

**Compound 5d (CAS: 177573-86-3**, known compound)<sup>9</sup>. Following **GPD**, the product was prepared and purified by flash column chromatography (eluent: EtOAc/petroleum ether = 1/20) as a colorless oil (21.2 mg, 87%). **<sup>1</sup>H NMR** (500 MHz, CDCl<sub>3</sub>) δ 7.31-7.26 (m, 2H), 7.22-7.15 (m, 3H), 6.76 (dt, *J* = 6.3 Hz, 17.9 Hz, 1H), 5.44 (dt, *J* = 1.4 Hz, 17.9 Hz, 1H), 3.44 (d, *J* = 6.3 Hz, 2H), 1.25 (s, 12H). **<sup>13</sup>C NMR** (126 MHz, CDCl<sub>3</sub>) δ 152.4, 139.1, 128.9, 128.4, 126.1, 83.1, 42.3, 24.8.

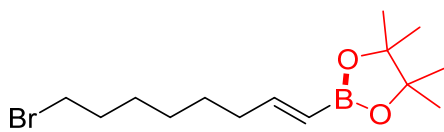

**Compound 5e (CAS: 1547450-06-9)**. Following **GPD**, the product was prepared and purified by flash column chromatography (eluent: EtOAc/petroleum ether = 1/20) as a colorless oil (24.0 mg, 76%). **<sup>1</sup>H NMR** (500 MHz, CDCl<sub>3</sub>) δ 6.61(dt, *J* = 6.4 Hz, 18.0 Hz, 1H), 5.42(d, *J* = 18.0 Hz, 1H), 3.39(t, *J* = 6.8 Hz, 2H), 2.18-2.11 (m, 2H), 1.87-1.81 (m, 2H), 1.45-1.39 (m, 4H), 1.35-1.29 (m, 2H), 1.26 (s, 12H). **<sup>13</sup>C NMR** (126 MHz, CDCl<sub>3</sub>) δ 154.3, 83.0, 35.6, 33.9, 32.7, 28.3, 28.0, 27.9, 24.8. **HRMS** (ESI-TOF) *m/z*: [M+H]<sup>+</sup> Calcd for C<sub>14</sub>H<sub>26</sub>BBrO<sub>2</sub>H<sup>+</sup> 316.1318; Found 316.1308.

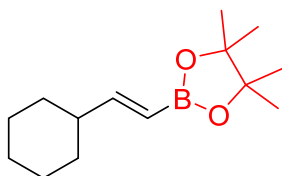

**Compound 5f (CAS: 172512-85-5, known compound)**<sup>11</sup>.

Following **GPD**, the product was prepared and purified by flash column chromatography (eluent: EtOAc/petroleum ether = 1/20) as a colorless oil (14.2 mg, 60%). **<sup>1</sup>H NMR** (500 MHz, CDCl<sub>3</sub>) δ 6.57 (dd, *J* = 6.2 Hz, 18.2 Hz, 1H), 5.37 (dd, *J* = 1.4 Hz, 18.0 Hz, 1H), 2.06-1.98 (m, 1H), 1.78-1.70 (m, 4H), 1.64-1.60 (m, 1H), 1.26 (s, 12H), 1.19-1.04 (m, 5H). **<sup>13</sup>C NMR** (126 MHz, CDCl<sub>3</sub>) δ 159.8, 83.0, 43.2, 31.9, 26.2, 25.9, 24.8.

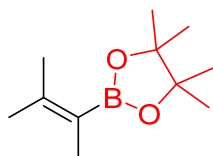

**Compound 5g (CAS: 219488-99-0, known compound)**<sup>11</sup>.

Following **GPD**, the product was prepared and purified by flash column chromatography (eluent: EtOAc/petroleum ether = 1/20) as a colorless oil (1.8 mg, 9%). **<sup>1</sup>H NMR** (500 MHz, CDCl<sub>3</sub>) δ 1.97 (d, *J* = 1.4 Hz, 3H), 1.72 (brs, 3H), 1.67 (brs, 3H), 1.27 (s, 12H). **<sup>13</sup>C NMR** (126 MHz, CDCl<sub>3</sub>) δ 148.2, 82.7, 24.8, 24.4, 21.2, 16.5.

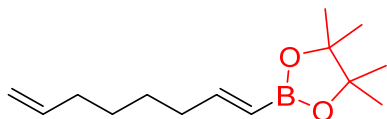

**Compound 5h.** Following **GPD**, the product was prepared and purified by flash column chromatography (eluent: EtOAc/petroleum ether = 1/20) as a colorless oil (15.1 mg, 64%). **<sup>1</sup>H NMR** (500 MHz, CDCl<sub>3</sub>) δ 6.63 (dt, *J* = 6.7 Hz, 17.9 Hz, 1H), 5.85-5.73 (m, 1H), 5.43 (dt, *J* = 1.4 Hz, 17.9 Hz, 1H), 2.19-2.13 (m, 2H), 2.08-2.01 (m, 2H), 1.46-1.39 (m, 4H), 1.26 (s, 12H). **<sup>13</sup>C NMR** (126 MHz, CDCl<sub>3</sub>) δ 154.5, 138.9, 114.3, 83.0, 35.6, 33.6, 28.4, 27.7, 24.8. **HRMS** (ESI-TOF) *m/z*: [M+Na]<sup>+</sup> Calcd for C<sub>14</sub>H<sub>25</sub>BO<sub>2</sub>Na<sup>+</sup> 258.1876; Found 258.1873.

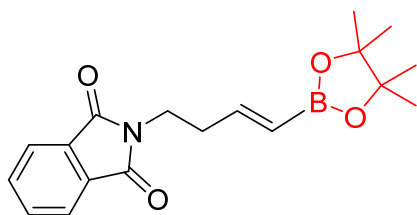

**Compound 5i (CAS: 1160924-49-1).** Following **GPD**, the product was prepared and purified by flash column chromatography (eluent: EtOAc/petroleum ether = 1/20) as a colorless oil (25.5 mg, 78%). **<sup>1</sup>H NMR** (500 MHz, CDCl<sub>3</sub>) δ 7.84-7.81 (m, 2H), 7.71-7.68 (m, 2H), 6.59 (dt, *J* = 6.7

Hz, 18.0 Hz, 1H), 5.52 (dt,  $J = 1.4$  Hz, 18.0 Hz, 1H), 3.78 (d,  $J = 7.5$  Hz, 2H), 2.57-2.51 (m, 2H), 1.24 (s, 12H).  $^{13}\text{C NMR}$  (126 MHz,  $\text{CDCl}_3$ )  $\delta$  168.2, 149.2, 133.9, 132.1, 123.2, 83.2, 36.7, 34.6, 24.7. **HRMS** (ESI-TOF)  $m/z$ :  $[\text{M}+\text{H}]^+$  Calcd for  $\text{C}_{18}\text{H}_{22}\text{BNO}_4\text{H}^+$  327.1751; Found 327.1756.

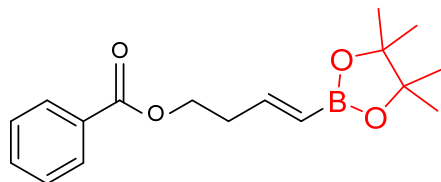

**Compound 5j** (CAS: 581802-27-9, known compound)<sup>13</sup>. Following **GPD**, the product was prepared and purified by flash column chromatography (eluent: EtOAc/petroleum ether = 1/20) as a colorless oil (25.4 mg, 84%).  $^1\text{H NMR}$  (500 MHz,  $\text{CDCl}_3$ )  $\delta$  8.03 (d,  $J = 7.1$  Hz, 2H), 7.55 (t,  $J = 7.5$  Hz, 1H), 7.43 (t,  $J = 7.7$  Hz, 2H), 6.66 (dt,  $J = 6.6$  Hz, 17.9 Hz, 1H), 5.60 (d,  $J = 17.9$  Hz, 1H), 4.39 (t,  $J = 6.7$  Hz, 2H), 2.66-2.61 (m, 2H), 1.27 (s, 12H).  $^{13}\text{C NMR}$  (126 MHz,  $\text{CDCl}_3$ )  $\delta$  166.5, 149.0, 132.9, 130.3, 129.6, 128.3, 83.2, 63.5, 35.0, 24.8.

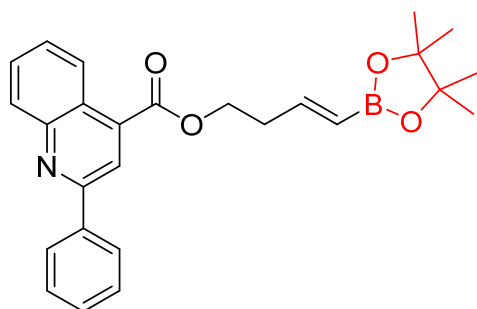

**Compound 5k**. Following **GPD**, the product was prepared and purified by flash column chromatography (eluent: EtOAc/petroleum ether = 1/20) as a yellow solid (34.3 mg, 80%).  $^1\text{H NMR}$  (500 MHz,  $\text{CDCl}_3$ )  $\delta$  8.73 (dd,  $J = 0.7$  Hz, 8.6 Hz, 1H), 8.38 (s, 1H), 8.24-8.18 (m, 3H), 7.76 (ddd,  $J = 1.4$  Hz, 6.9 Hz, 8.4 Hz, 1H), 7.62 (ddd,  $J = 1.4$  Hz, 6.9 Hz, 8.4 Hz, 1H), 7.57-7.52 (m, 2H), 7.51-7.46 (m, 1H), 6.71 (dt,  $J = 6.5$  Hz, 18.0 Hz, 1H), 5.68 (dt,  $J = 1.4$  Hz, 18.0 Hz, 1H), 4.57 (t,  $J = 6.6$  Hz, 2H), 2.73 (qd,  $J = 1.4$  Hz, 6.6 Hz, 2H), 1.26 (s, 12H).  $^{13}\text{C NMR}$  (126 MHz,  $\text{CDCl}_3$ )  $\delta$  166.4, 156.7, 149.2, 148.6, 138.8, 135.9, 130.3, 129.9, 129.7, 128.9, 127.7, 127.5, 125.5, 124.0, 120.3, 83.3, 64.3, 34.9, 24.8. **HRMS** (ESI-TOF)  $m/z$ :  $[\text{M}+\text{H}]^+$  Calcd for  $\text{C}_{26}\text{H}_{29}\text{BNO}_4^+$  429.2220; Found 429.2215

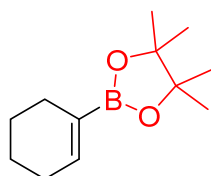

**Compound 5l** (CAS: 141091-37-4, known compound)<sup>14</sup>.



Following **GPD**, the product was prepared and purified by flash column chromatography (eluent: EtOAc/petroleum ether = 1/20) as a colorless oil (17.3 mg, 83%). **<sup>1</sup>H NMR** (500 MHz, CDCl<sub>3</sub>) δ 6.59-6.54 (m, 1H), 2.12-2.06 (m, 4H), 1.60-1.56 (m, 4H), 1.25 (s, 12H). **<sup>13</sup>C NMR** (126 MHz, CDCl<sub>3</sub>) δ 142.9, 83.0, 26.6, 26.1, 24.8, 22.5, 22.1.

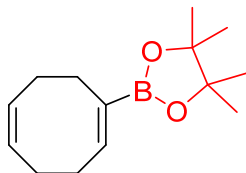

**Compound 5n (CAS: 1392323-63-5, known compound)**<sup>15</sup>.

Following **GPD**, the product was prepared and purified by flash column chromatography (eluent: EtOAc/petroleum ether = 1/20) as a colorless oil (13.6 mg, 58%). **<sup>1</sup>H NMR** (500 MHz, CDCl<sub>3</sub>) δ 6.51 (d, *J* = 5.3 Hz, 1H), 5.56-5.50 (m, 2H), 2.56-2.52 (m, 2H), 2.47-2.38 (m, 4H), 2.36-2.30 (m, 2H), 1.24 (s, 12H). **<sup>13</sup>C NMR** (126 MHz, CDCl<sub>3</sub>) δ 144.29, 129.28, 127.99, 83.08, 77.25, 77.00, 76.75, 30.57, 29.44, 27.77, 27.01, 24.78.

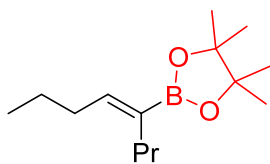

**Compound Z-5o (CAS: 177949-95-0, known compound)**<sup>16</sup>.

Following **GPD**, the product was prepared and purified by flash column chromatography (eluent: EtOAc/petroleum ether = 1/20) as a colorless oil (7.6 mg, 32%). **<sup>1</sup>H NMR** (500 MHz, CDCl<sub>3</sub>) δ 6.29 (t, *J* = 7.1 Hz, 1H), 2.13-2.08 (m, 4H), 1.44-1.40 (m, 2H), 1.36-1.32 (m, 2H), 1.25 (s, 12H), 0.91 (t, *J* = 7.4 Hz, 3H), 0.88 (t, *J* = 7.4 Hz, 3H). **<sup>13</sup>C NMR** (126 MHz, CDCl<sub>3</sub>) δ 146.0, 83.0, 30.63, 30.56, 24.7, 23.3, 22.4, 14.1, 14.0.

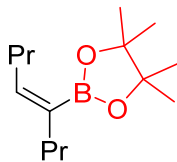

**Compound E-5o (CAS: 2055824-75-2, known compound)**<sup>17</sup>.

Following **GPD**, the product was prepared and purified by flash column chromatography (eluent: EtOAc/petroleum ether = 1/20) as a colorless oil (16.2 mg, 68%). **<sup>1</sup>H NMR** (500 MHz, CDCl<sub>3</sub>) δ 5.98 (t, *J* = 7.4 Hz, 1H), 2.27 (q, *J* = 7.3 Hz, 2H), 2.06 (t, *J* = 7.4 Hz, 2H), 1.41-1.34 (m, 4H), 1.26 (s, 12H), 0.90-0.84 (m, 6H). **<sup>13</sup>C NMR** (126 MHz, CDCl<sub>3</sub>) δ 145.9, 82.7, 39.1, 33.1, 24.8, 23.4, 23.2, 13.8, 13.7.

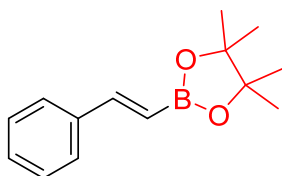

**Compound 5p (CAS: 83947-56-2, known compound)<sup>18</sup>.**

Following **GPD**, the product was prepared and purified by flash column chromatography (eluent: EtOAc/petroleum ether = 1/20) as a colorless oil (18.4 mg, 80%). **<sup>1</sup>H NMR** (500 MHz, CDCl<sub>3</sub>) δ 7.44-7.40 (m, 2H), 7.33 (d, *J* = 18.5 Hz, 1H), 7.29-7.19 (m, 3H), 6.10 (d, *J* = 18.5 Hz, 1H), 1.24 (s, 12H). **<sup>13</sup>C NMR** (126 MHz, CDCl<sub>3</sub>) δ 149.5, 137.5, 128.9, 128.6, 127.0, 83.3, 24.8.

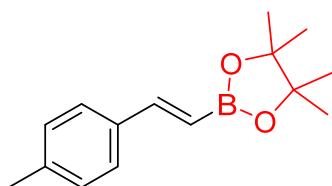

**Compound 5q (CAS: 149777-84-4, known compound)<sup>18</sup>.**

Following **GPD**, the product was prepared and purified by flash column chromatography (eluent: EtOAc/petroleum ether = 1/20) as a colorless oil (19.3 mg, 79%). **<sup>1</sup>H NMR** (500 MHz, CDCl<sub>3</sub>) δ 7.40-7.35 (m, 3H), 7.14 (d, *J* = 8.0 Hz, 2H), 6.11 (d, *J* = 18.5 Hz, 1H), 2.35 (s, 3H), 1.24 (s, 12H). **<sup>13</sup>C NMR** (126 MHz, CDCl<sub>3</sub>) δ 149.5, 138.9, 134.8, 129.3, 127.0, 83.3, 24.8, 21.3.

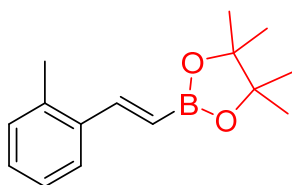

**Compound 5r (CAS: 1294009-26-9, known compound)<sup>18</sup>.**

Following **GPD**, the product was prepared and purified by flash column chromatography (eluent: EtOAc/petroleum ether = 1/20) as a colorless oil (20.0 mg, 82%). **<sup>1</sup>H NMR** (500 MHz, CDCl<sub>3</sub>) δ 7.65 (d, *J* = 18.3 Hz, 1H), 7.57-7.54 (m, 1H), 7.21-7.13 (m, 3H), 6.08 (d, *J* = 18.3 Hz, 1H), 2.42 (s, 3H), 1.32 (s, 12H). **<sup>13</sup>C NMR** (126 MHz, CDCl<sub>3</sub>) δ 147.1, 136.7, 136.3, 130.4, 128.6, 126.1, 125.8, 83.3, 24.8, 19.8.

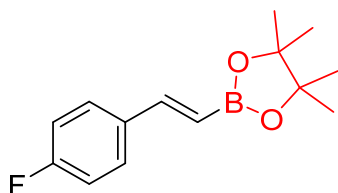

**Compound 5s (CAS: 504433-86-7, known compound)<sup>18</sup>.**

Following **GPD**, the product was prepared and purified by flash column chromatography (eluent: EtOAc/petroleum ether = 1/20) as a white solid (20.6 mg, 83%). **<sup>1</sup>H NMR** (500 MHz, CDCl<sub>3</sub>) δ 7.48-7.43 (m, 2H), 7.35 (d, *J* = 18.5 Hz,

1H), 7.02 (t,  $J = 8.7$  Hz, 2H), 6.07 (d,  $J = 18.5$  Hz, 1H), 1.31 (s, 12H).  $^{13}\text{C}$  NMR (126 MHz,  $\text{CDCl}_3$ )  $\delta$  163.1 (d,  $J = 248.6$  Hz), 148.2, 133.7 (d,  $J = 2.9$  Hz), 128.7 (d,  $J = 8.3$  Hz), 115.5 (d,  $J = 21.7$  Hz), 83.4, 24.8.  $^{19}\text{F}$  NMR (471 MHz,  $\text{CDCl}_3$ )  $\delta$  -112.41 (m).

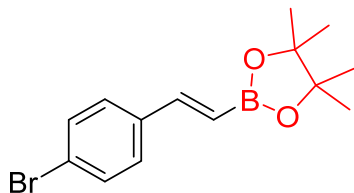

**Compound 5t** (CAS: 1242770-51-9, known compound)<sup>18</sup>. Following **GPD**, the product was prepared and purified by flash column chromatography (eluent: EtOAc/petroleum ether = 1/20) as a white solid (26.5 mg, 86%).  $^1\text{H}$  NMR (500 MHz,  $\text{CDCl}_3$ )  $\delta$  7.46 (d,  $J = 8.5$  Hz, 2H), 7.36-7.29 (m, 3H), 6.15 (d,  $J = 18.4$  Hz, 1H), 1.31 (s, 12H).  $^{13}\text{C}$  NMR (126 MHz,  $\text{CDCl}_3$ )  $\delta$  148.1, 136.4, 131.7, 128.5, 122.9, 83.5, 24.8.

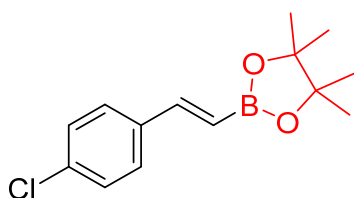

**Compound 5u** (CAS: 223919-54-8, known compound)<sup>18</sup>. Following **GPD**, the product was prepared and purified by flash column chromatography (eluent: EtOAc/petroleum ether = 1/20) as a white solid (21.9 mg, 83%).  $^1\text{H}$  NMR (500 MHz,  $\text{CDCl}_3$ )  $\delta$  7.40 (d,  $J = 8.5$  Hz, 2H), 7.33 (d,  $J = 18.5$  Hz, 1H), 7.30 (d,  $J = 8.5$  Hz, 2H), 6.13 (d,  $J = 18.5$  Hz, 1H), 1.31 (s, 12H).  $^{13}\text{C}$  NMR (126 MHz,  $\text{CDCl}_3$ )  $\delta$  148.0, 136.0, 134.6, 128.8, 128.2, 83.5, 24.8.

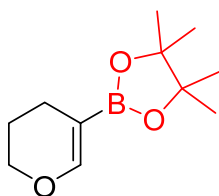

**Compound 5v** (CAS: 1046811-99-7, known compound)<sup>19</sup>. According to **GPD** at 25 °C for 3 h. The product was prepared and purified by flash column chromatography (eluent: EtOAc/petroleum ether = 1/20) as a colorless oil (13.2 mg, 63%).  $^1\text{H}$  NMR (500 MHz,  $\text{CDCl}_3$ )  $\delta$  6.97 (s, 1H), 4.01 (t,  $J = 5.2$  Hz, 2H), 2.08-2.04 (m, 2H), 1.84-1.79 (m, 2H), 1.24 (s, 12H).  $^{13}\text{C}$  NMR (126 MHz,  $\text{CDCl}_3$ )  $\delta$  155.1, 82.61, 66.2, 24.7, 22.2, 20.1.

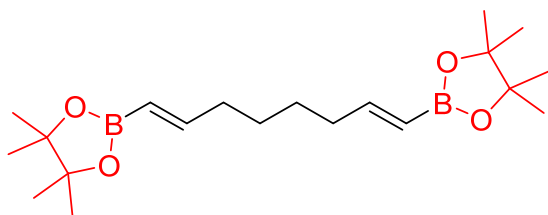

**Compound 5w** (CAS: 1902952-72-0, known compound)<sup>20</sup>. According to general procedure and purified by flash column chromatography (eluent: EtOAc/petroleum ether = 1/20) as a colorless oil (19.6 mg, 54%). **<sup>1</sup>H NMR** (500 MHz, CDCl<sub>3</sub>) δ 6.61 (dt, *J* = 6.5 Hz, 18.0 Hz, 1H), 5.41 (d, *J* = 18.0 Hz, 1H), 2.18-2.12 (m, 2H), 1.45-1.41 (m, 2H), 1.24 (s, 12H). **<sup>13</sup>C NMR** (126 MHz, CDCl<sub>3</sub>) δ 154.4, 83.0, 35.6, 27.8, 24.8.

## 4 References

1. (a) J. Chen, J. Li, M. B. Plutschack, F. Berger and T. Ritter, Regio- and Stereoselective Thianthrenation of Olefins to Access Versatile Alkenyl Electrophiles, *Angew. Chem. Int. Ed.*, 2020, **59**, 5616–5620; (b) M. H. Aukland, F. J. T. Talbot, J. A. Fernández-Salas, M. Ball, A. P. Pulis, D. J. Procter, An Interrupted Pummerer/Nickel-Catalysed Cross-Coupling Sequence, *Angew. Chem. Int. Ed.*, 2018, **57**, 9785–9789
2. Y. Nagashima, D. Yukimori, C. Wang and M. Uchiyama, In Situ Generation of Silylzinc by Si–B Bond Activation Enabling Silylzincation and Silaboration of Terminal Alkynes, *Angew. Chem. Int. Ed.*, 2018, **57**, 8053–8057.
3. Y. Duan, G. Ji, S. Zhang, X. Chen and Y. Yang, Additive-Modulated Switchable Reaction Pathway in the Addition of Alkynes with Organosilanes Catalyzed by Supported Pd Nanoparticles: Hydrosilylation versus Semihydrogenation, *Catal. Sci. Technol.*, 2018, **8**, 1039–1050.
4. L. Zhang and M. Oestreich, Copper-Catalyzed Cross-Coupling of Vinylidonium Salts and Zinc-Based Silicon Nucleophiles, *Org. Lett.*, 2018, **20**, 8061–8063.
5. W. Adam and M. Richter, Regio- and Diastereoselective Ene Reaction of Triazolinedione with Vinylsilanes, *Chem. Ber.* 1992, **125**, 243–246.
6. S. Couty, C. Meyer and J. Cossy, Gold-Catalyzed Cycloisomerizations of Ene-Ynamides, *Tetrahedron*, 2009, **65**, 1809–1832.

7. P. Žak, M. Bołt, M. Kubicki and C. Pietraszuk, Highly Selective Hydrosilylation of Olefins and Acetylenes by Platinum(0) Complexes Bearing Bulky N-Heterocyclic Carbene Ligands, *Dalton Trans.*, 2018, **47**, 1903–1910.
8. P. Žak, M. Bołt and C. Pietraszuk, Selective Hydrosilylation of Dienes, Enynes, and Diynes Catalyzed by a Platinum Complex with a Very Bulky NHC Ligand – The Crucial Role of Precise Tuning of the Reaction Conditions, *Eur. J. Inorg. Chem.*, 2019, **2019**, 2455–2461.
9. S. Tanaka, Y. Saito, T. Yamamoto and T. Hattori, Electrophilic Borylation of Terminal Alkenes with  $\text{BBr}_3/2$ , 6-Disubstituted Pyridines, *Org. Lett.*, 2018, **20**, 1828–1831.
10. J. Li, C. Wang, J. Yu, P. Wang and J. Yu, Cu-Catalyzed C–H Alkenylation of Benzoic Acid and Acrylic Acid Derivatives with Vinyl Boronates, *Org. Lett.*, 2020, **22**, 4692–4696.
11. H. Yoshida, I. Kageyuki and K. Takaki, Silver-Catalyzed Highly Regioselective Formal Hydroboration of Alkynes, *Org. Lett.*, 2014, **16**, 3512–3515.
12. M. Silvi, C. Sandford and V. K. Aggarwa, Merging Photoredox with 1, 2-Metallate Rearrangements: The Photochemical Alkylation of Vinyl Boronate Complexes, *J. Am. Chem. Soc.*, 2017, **139**, 5736–5739.
13. M. Fujita, H. J. Lee and T. Okuyama, Stereochemical Inversion in the Vinylic Substitution of Boronic Esters to Give Iodonium Salts: Participation of the Internal Oxy Group, *Org. Lett.*, 2006, **8**, 1399–1401.
14. L. Tao, X. Guo, J. Li, R. Li, Z. Lin and W. Zhao, Rhodium-Catalyzed Deoxygenation and Borylation of Ketones: A Combined Experimental and Theoretical Investigation, *J. Am. Chem. Soc.*, 2020, **142**, 18118–18127.
15. Y. Wang, J. Wu, C. Hoong, V. Rauniyar and F. D. Toste, Enantioselective Halocyclization Using Reagents Tailored for Chiral Anion Phase-Transfer Catalysis, *J. Am. Chem. Soc.*, 2012, **134**, 12928–12931.
16. G. Zhang, J. Wu, H. Zeng, M. C. Neary, M. Devany, S. Zheng and P. A. Dub, Dearomatization and Functionalization of Terpyridine Ligands Leading to Unprecedented Zwitterionic Meisenheimer Aluminum Complexes and Their Use in Catalytic Hydroboration, *ACS Catal.*, 2019, **9**, 874–884.

17. L. Zhang and L. Jiao, Pyridine-Catalyzed Radical Borylation of Aryl Halides, *J. Am. Chem. Soc.*, 2017, **139**, 607–610.
18. X. Shi, S. Li and L. Wu, H<sub>2</sub>-Acceptorless Dehydrogenative Boration and Transfer Boration of Alkenes Enabled by Zirconium Catalyst, *Angew. Chem. Int. Ed.*, 2019, **58**, 16167–16171.
19. K. Takao, T. Jun, I. Tatsuo and M. Norio, Iridium-catalyzed Vinylic C–H Borylation of Cyclic Vinyl Ethers by Bis(pinacolato)diboron, *Chem. Lett.*, 2008, **37**, 664–665.
20. M. Fleige, J. Möbus, T. V. Stein, F. Glorius and D. W. Stephan, Lewis Acid Catalysis: Catalytic Hydroboration of Alkynes Initiated by Piers' Borane, *Chem. Commun.*, 2016, **52**, 10830–10833.

# 5 NMR Spectra

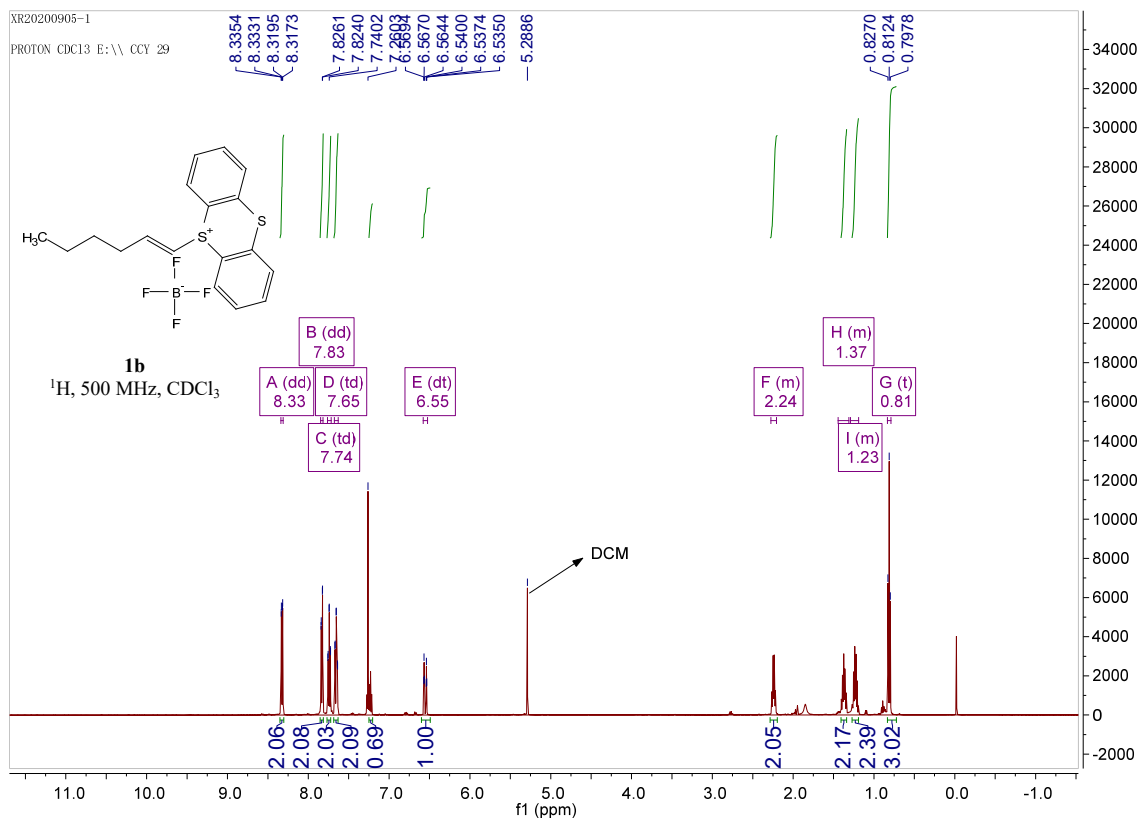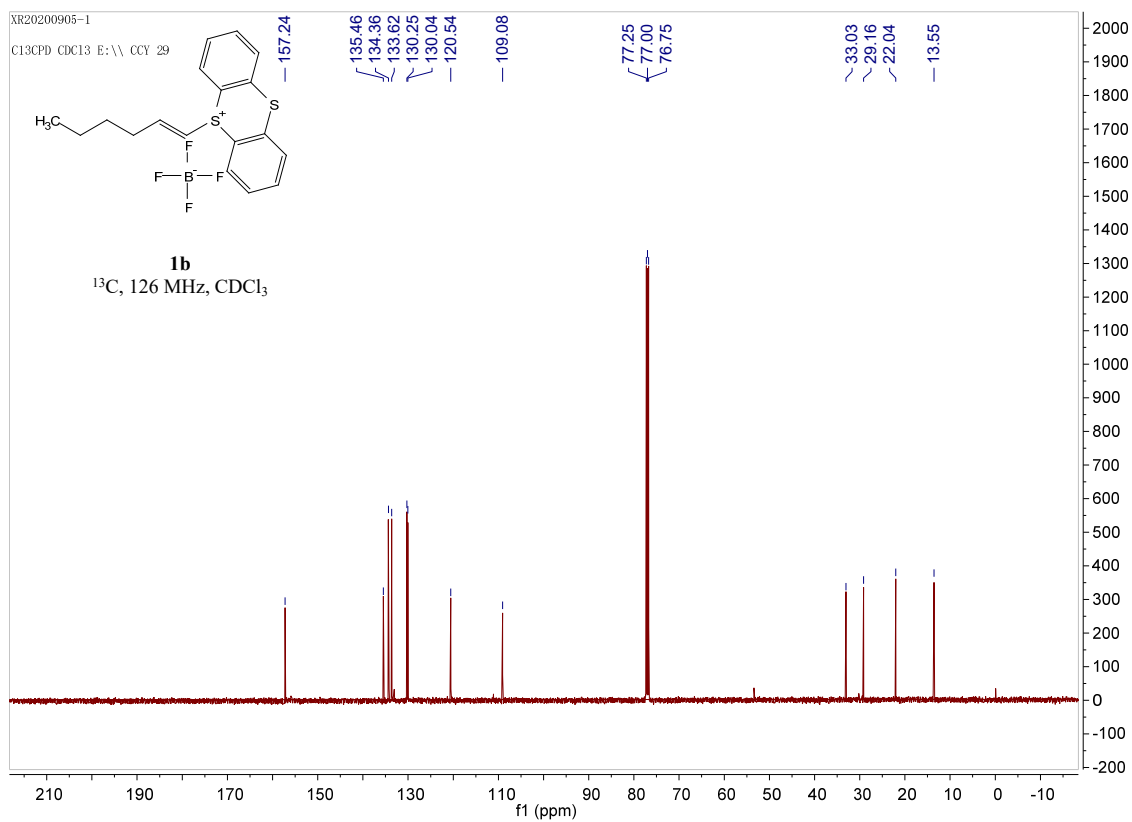

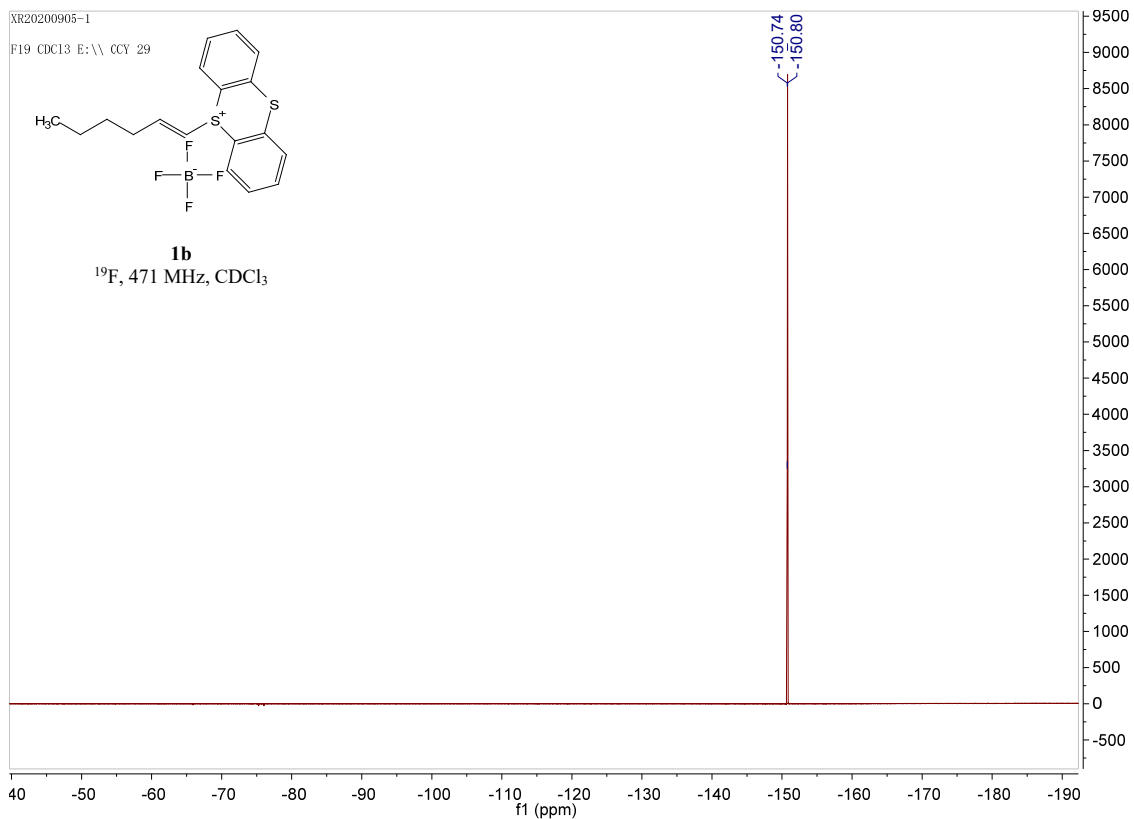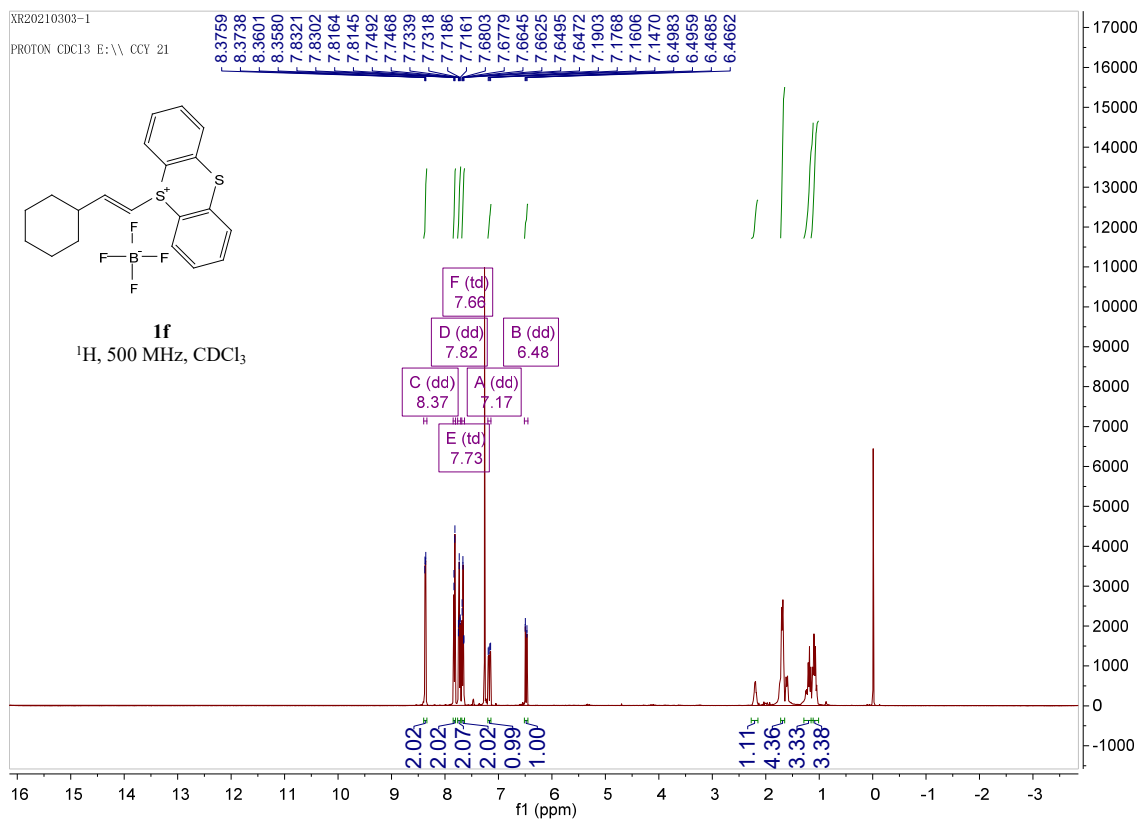



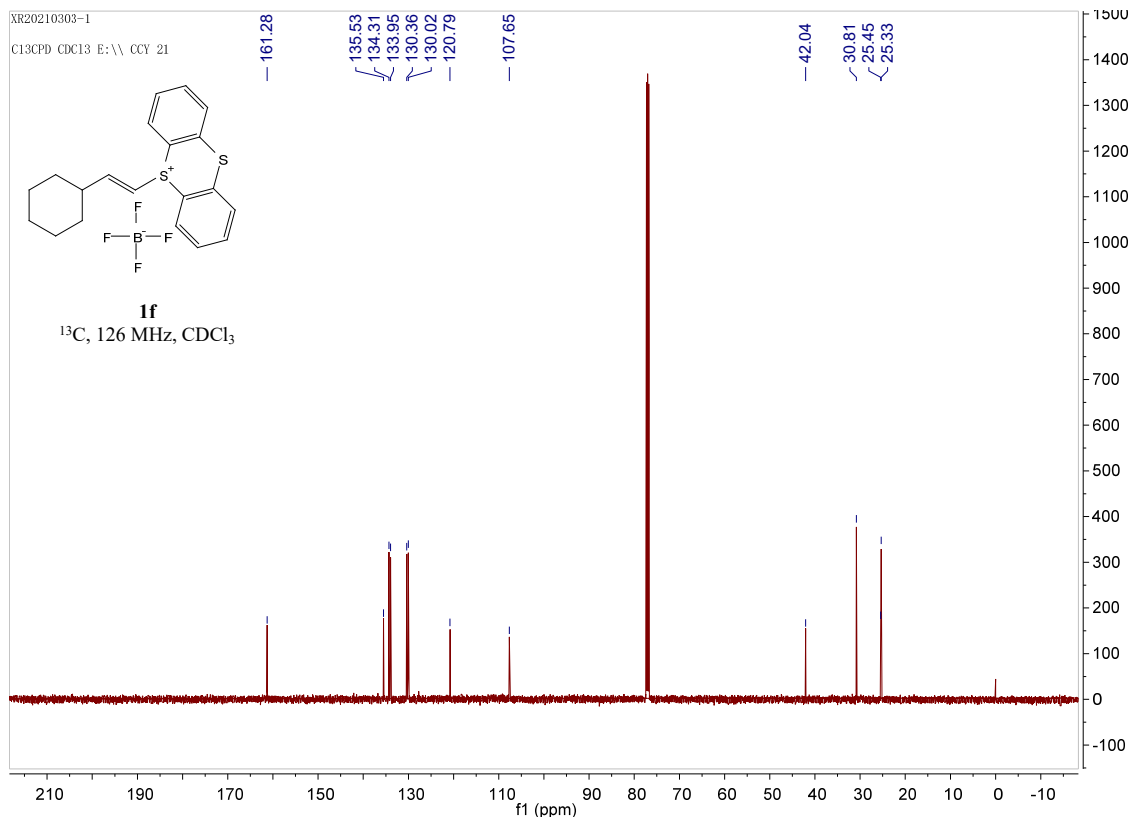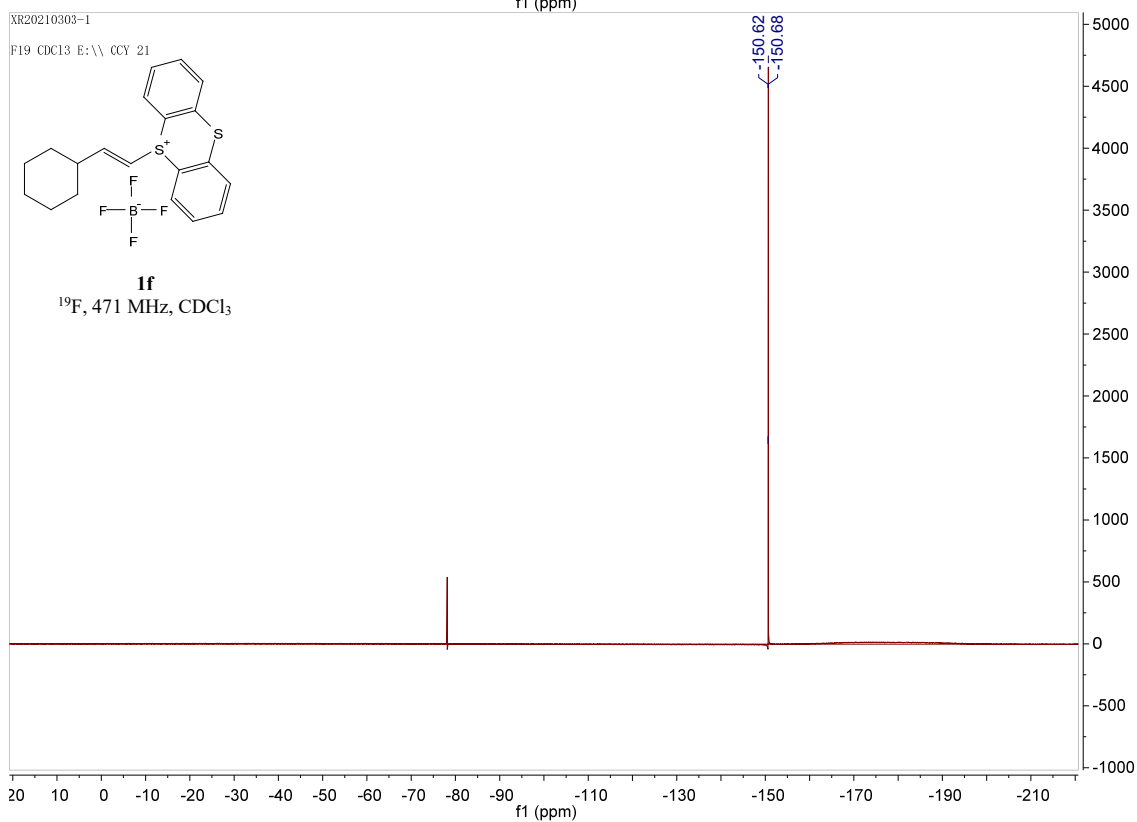

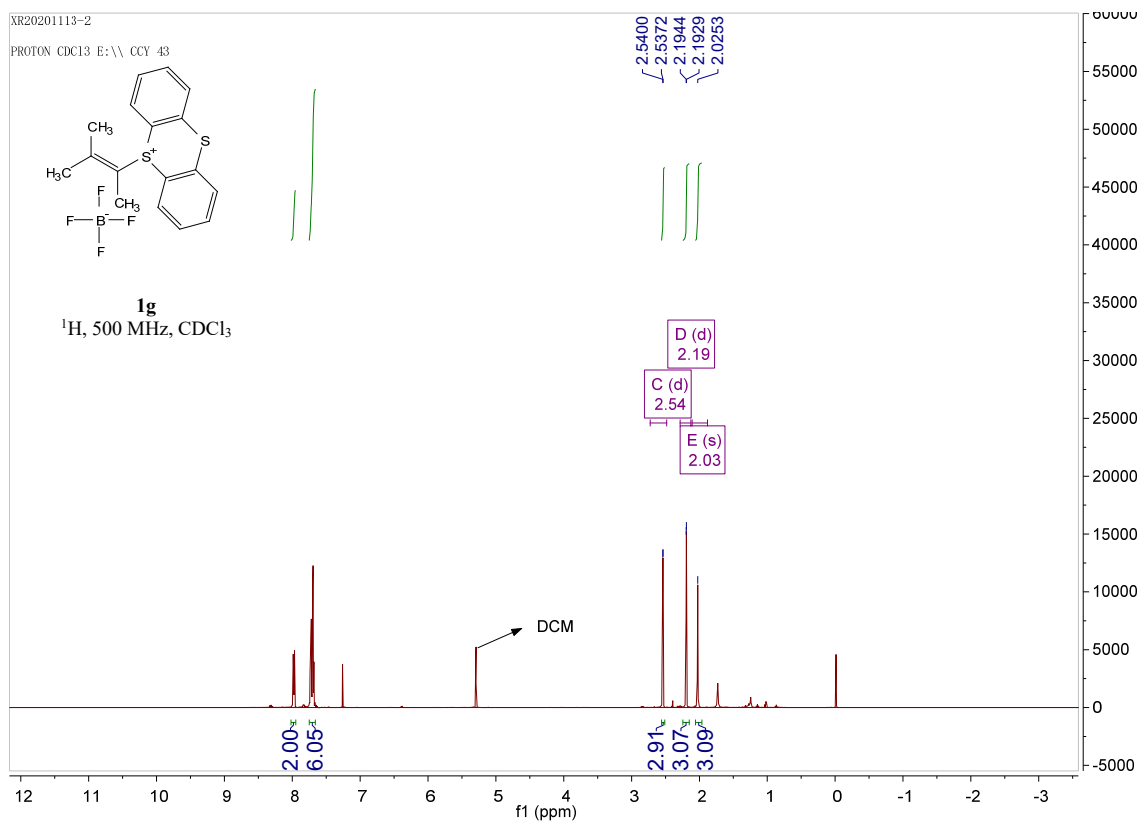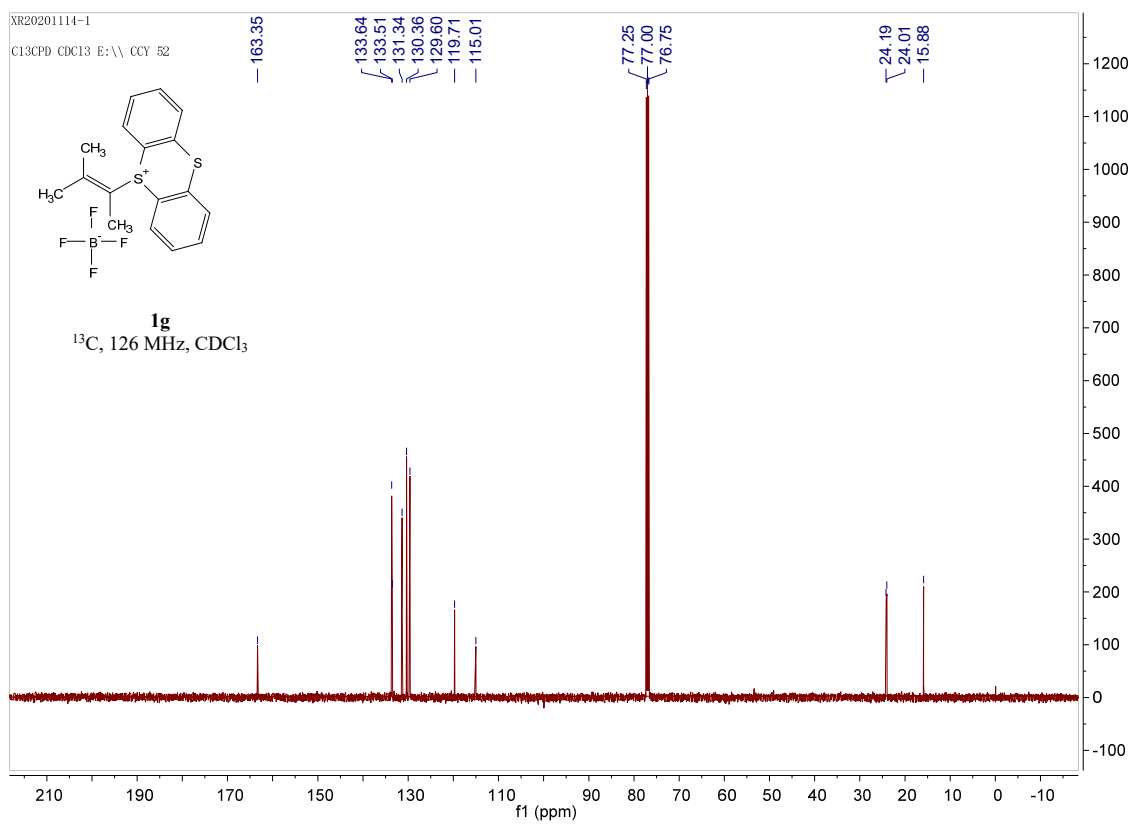

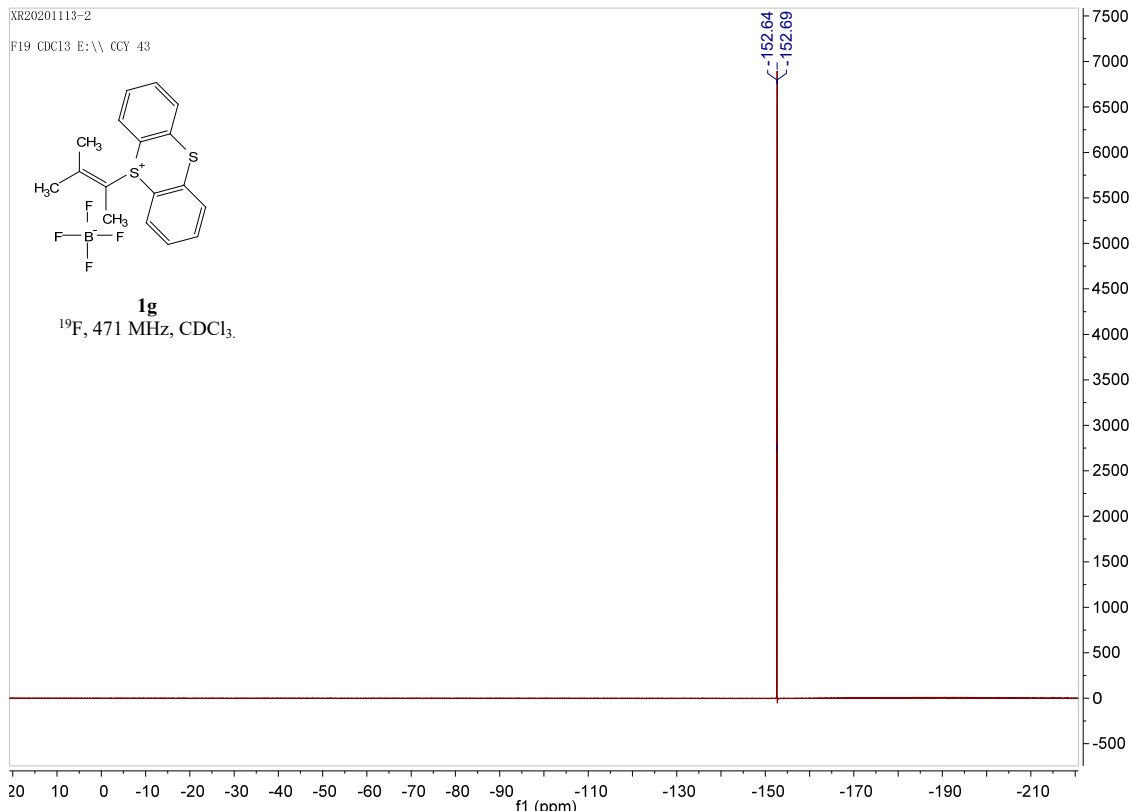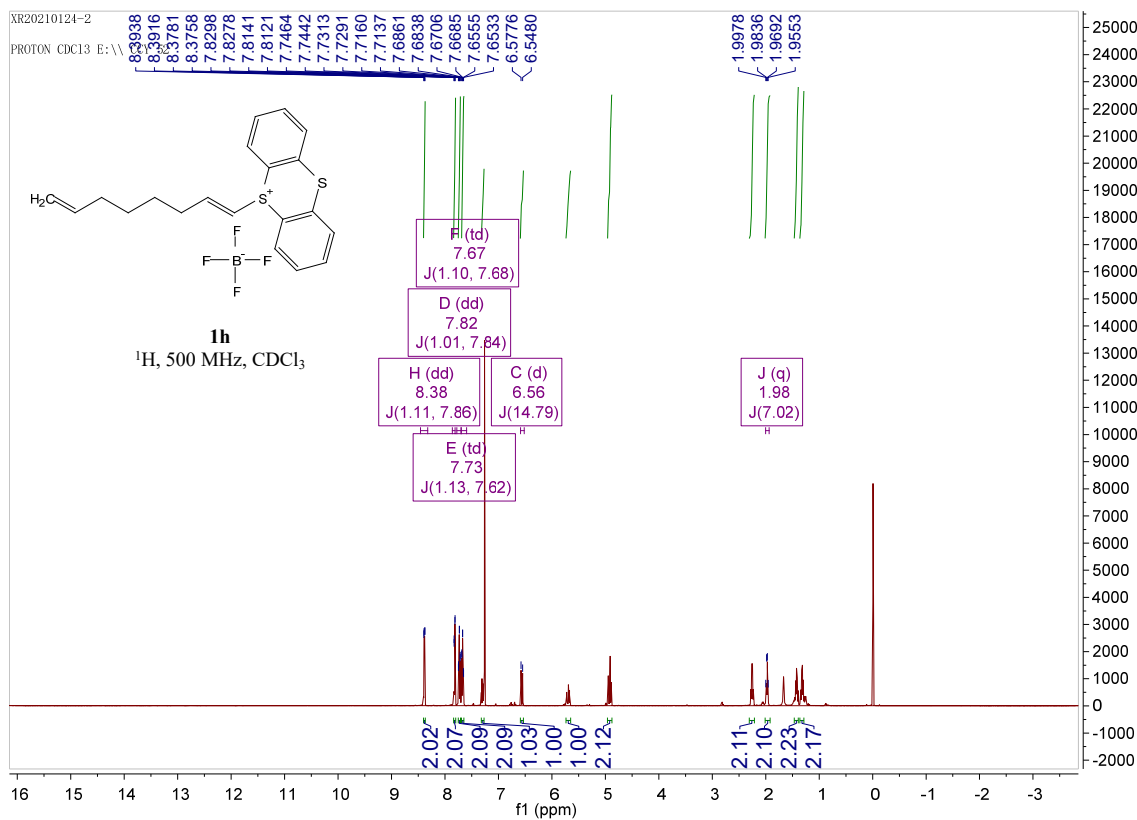

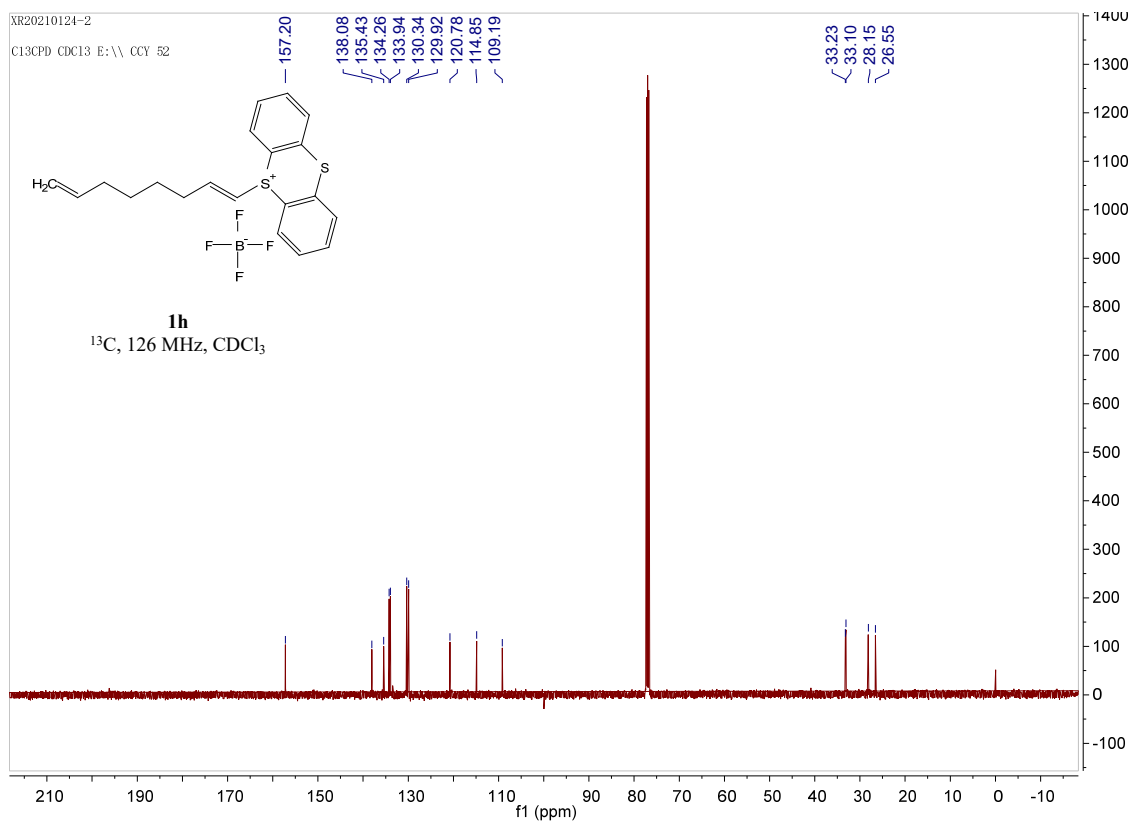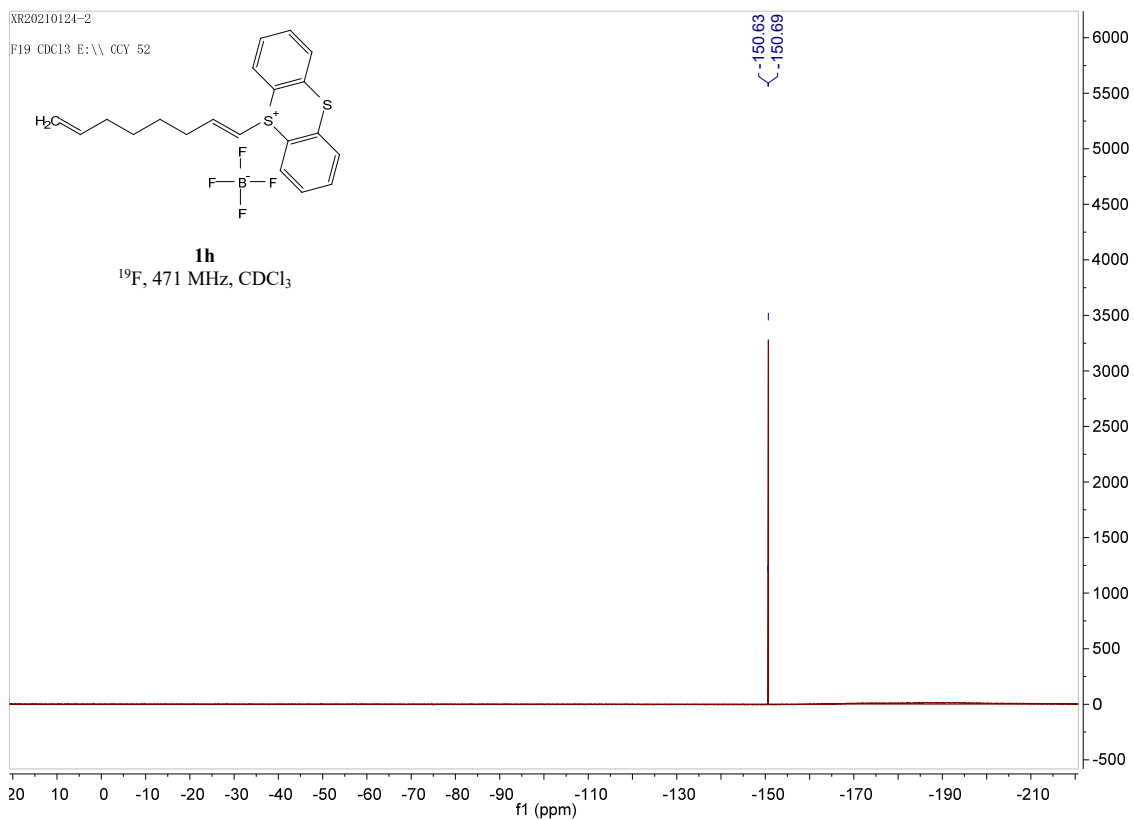

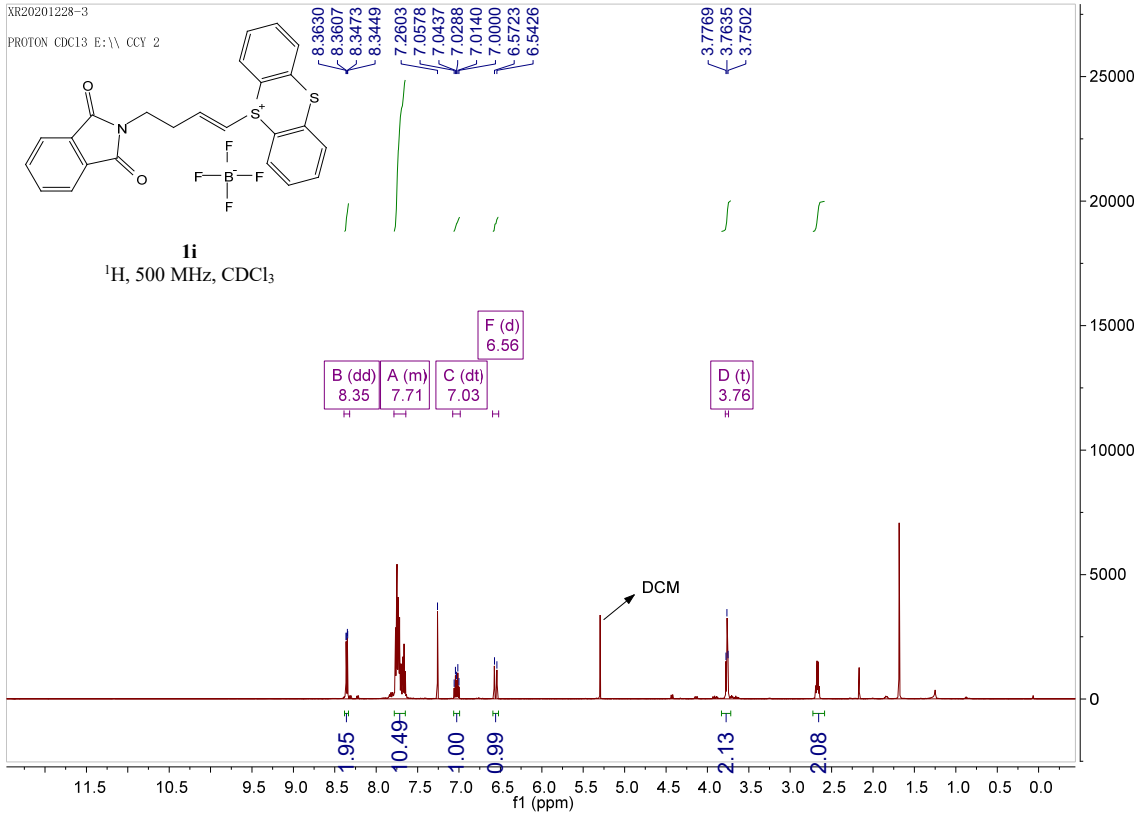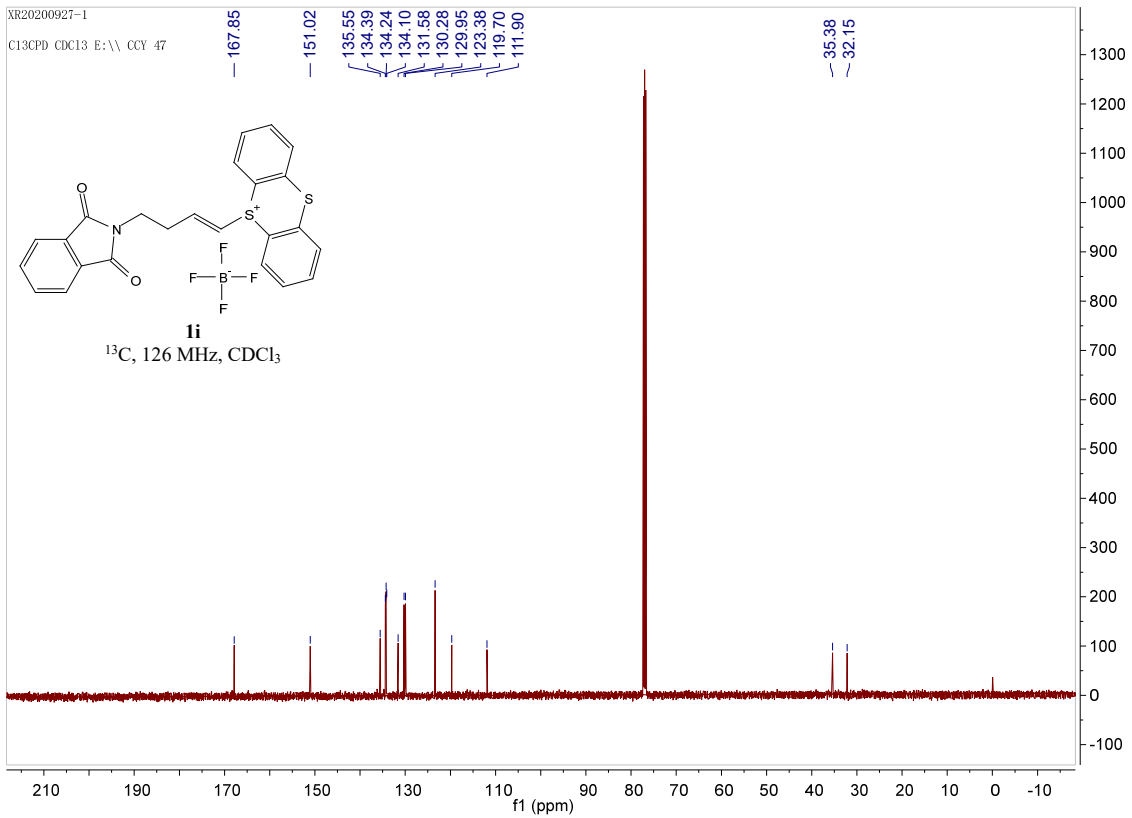

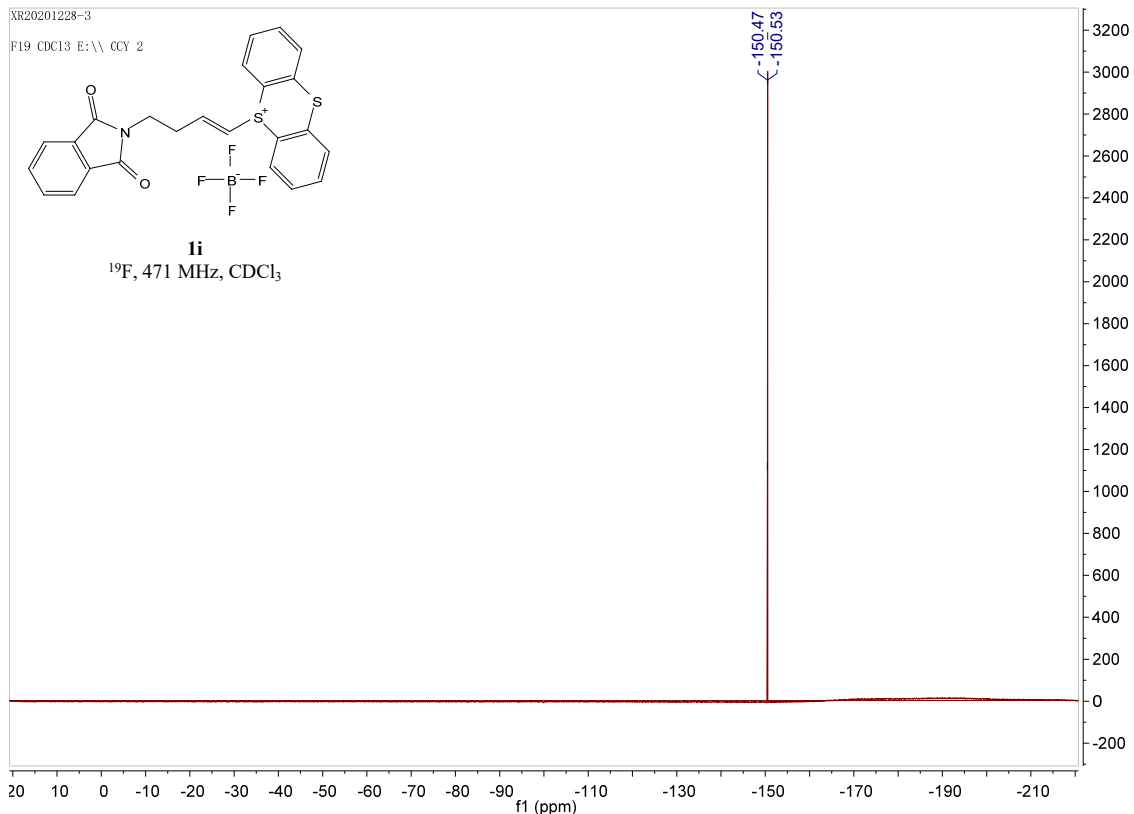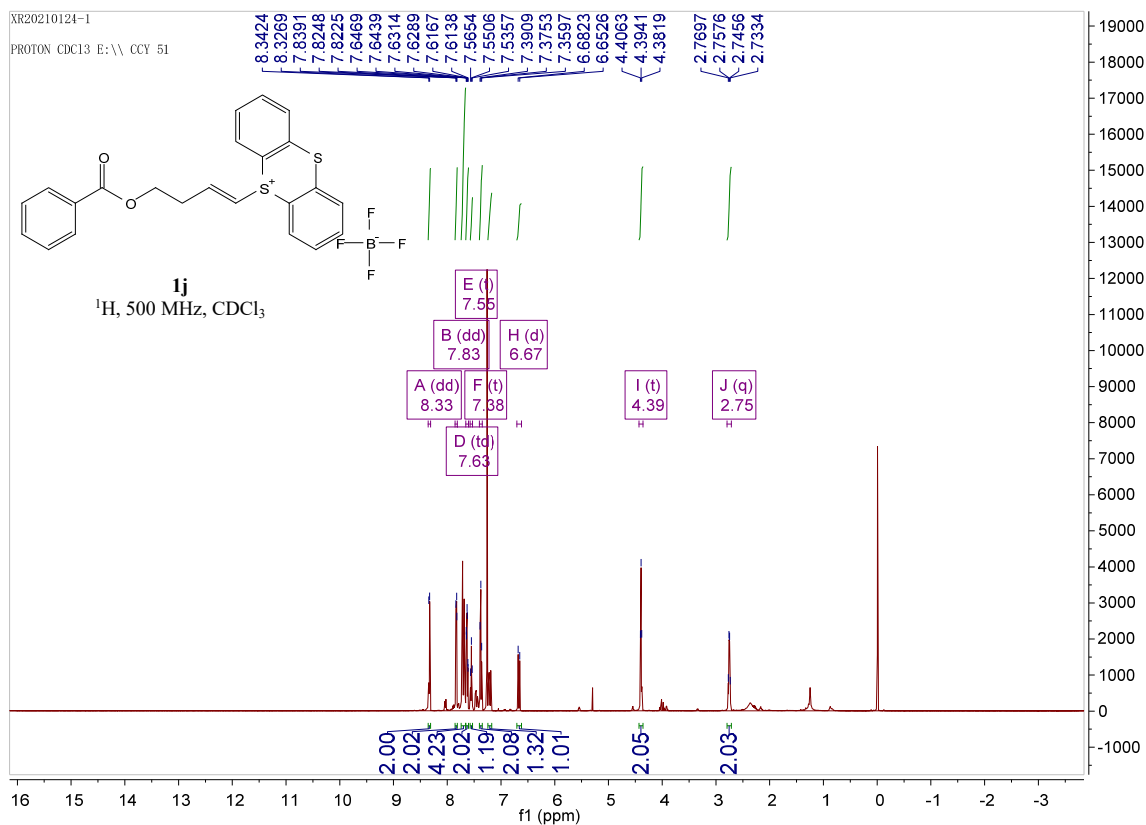

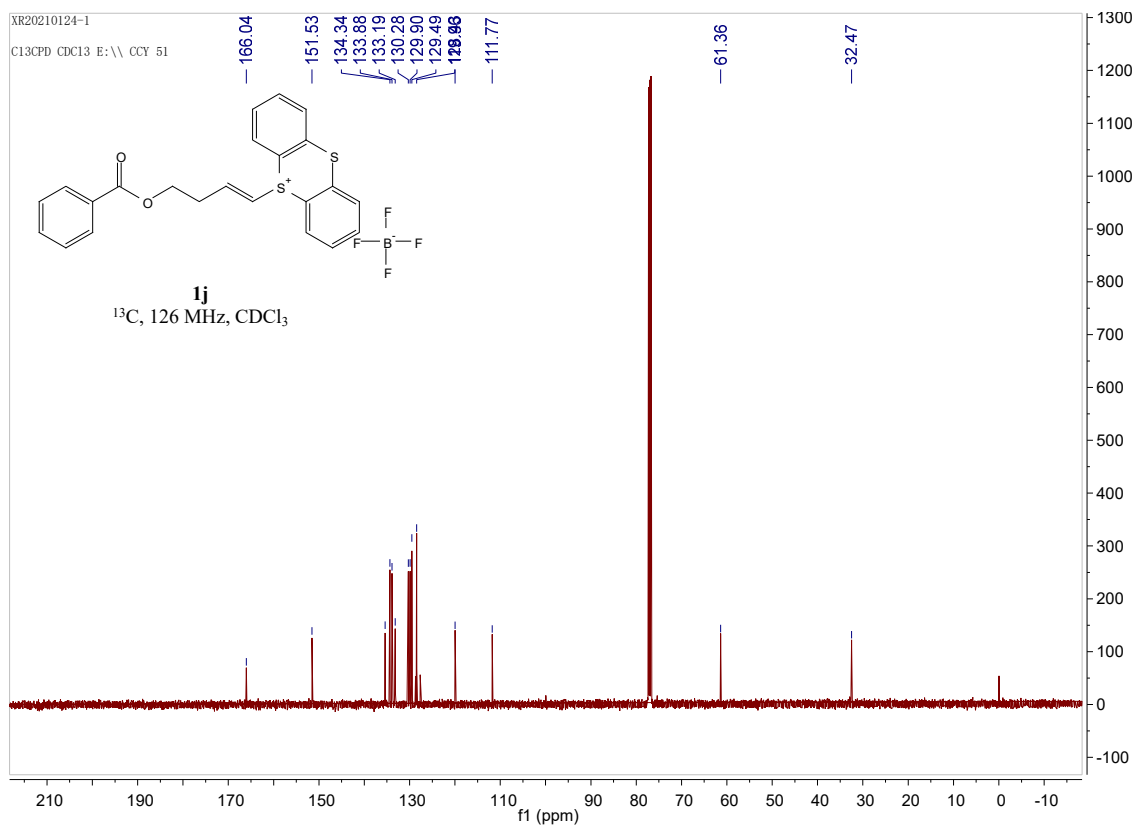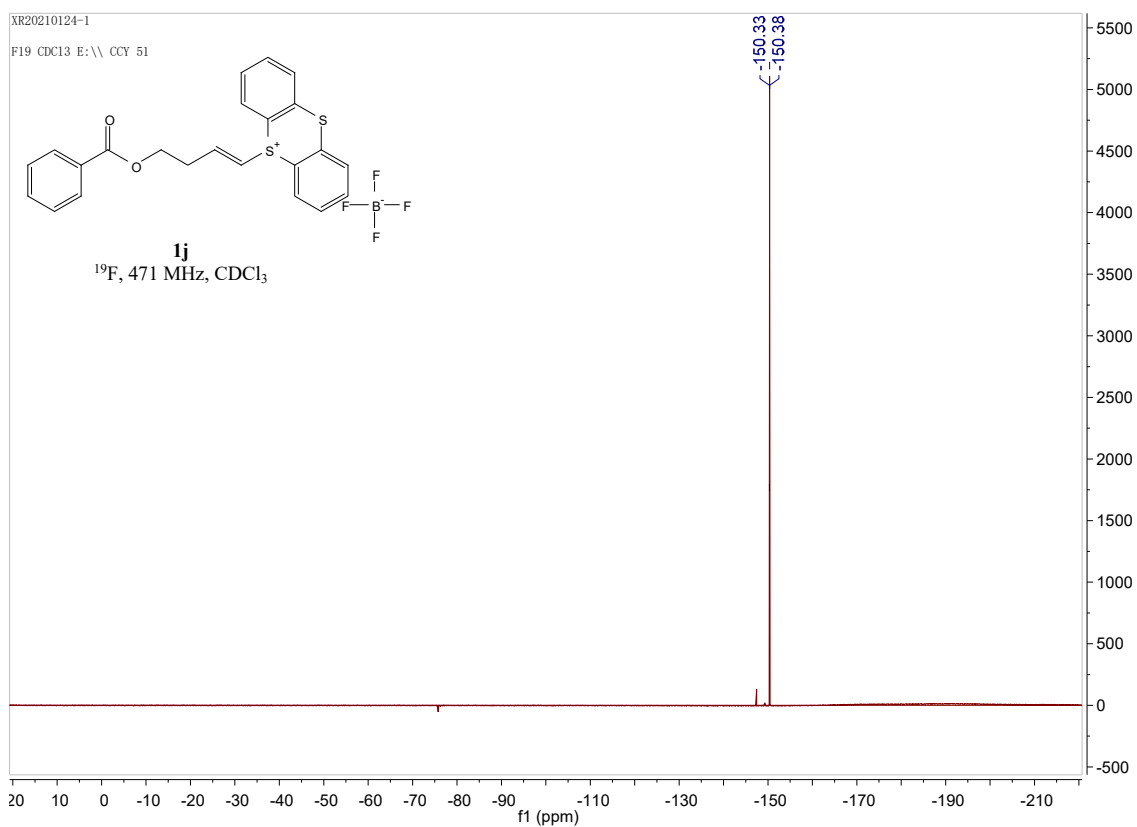

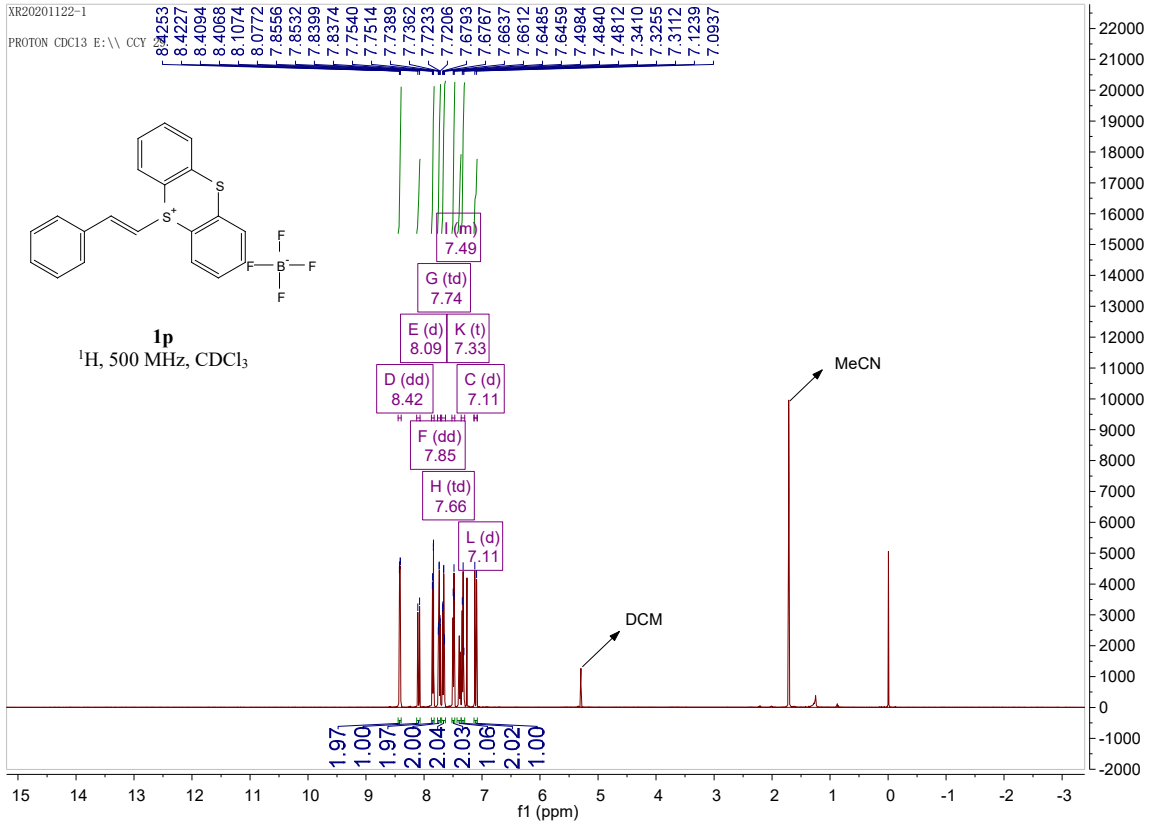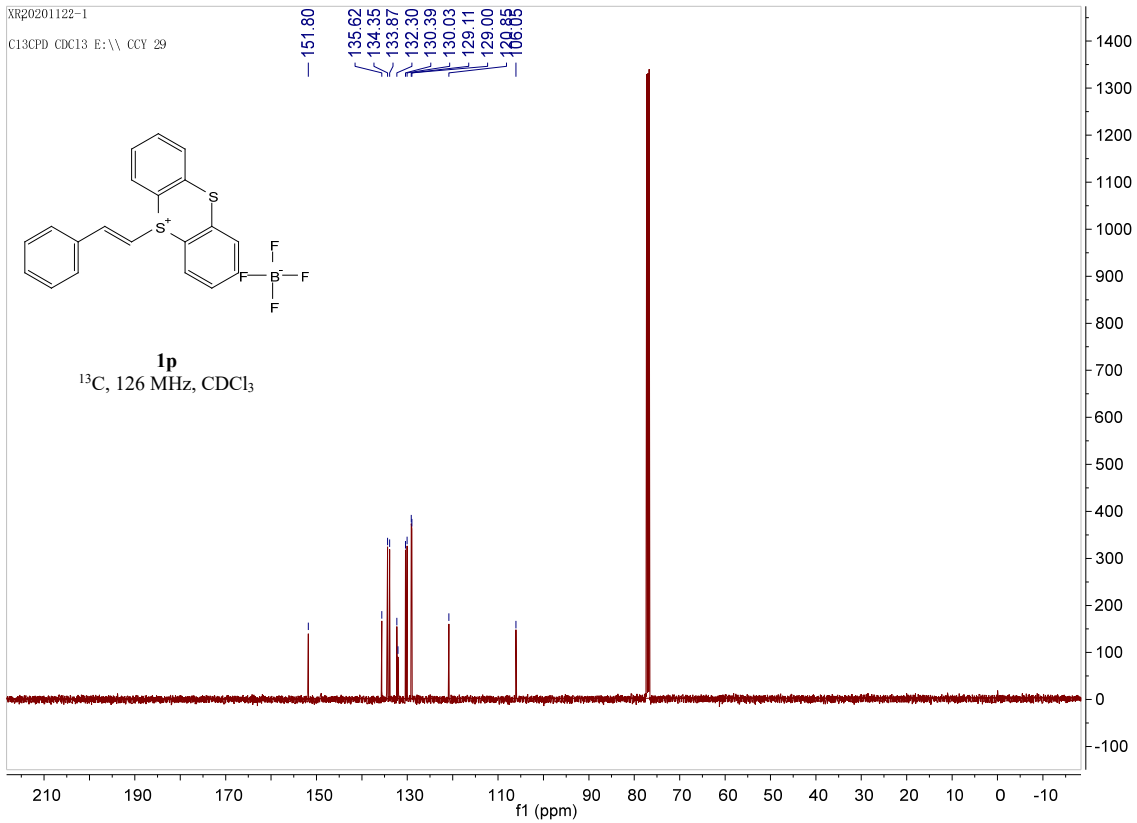



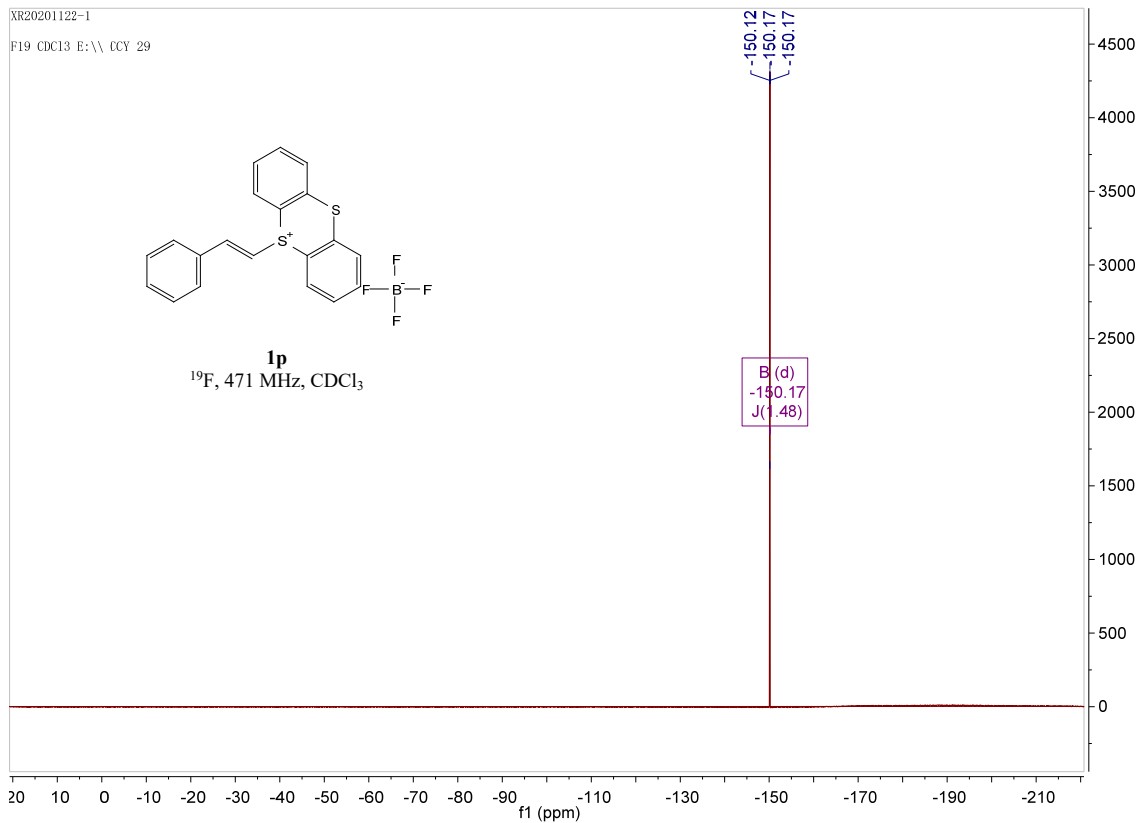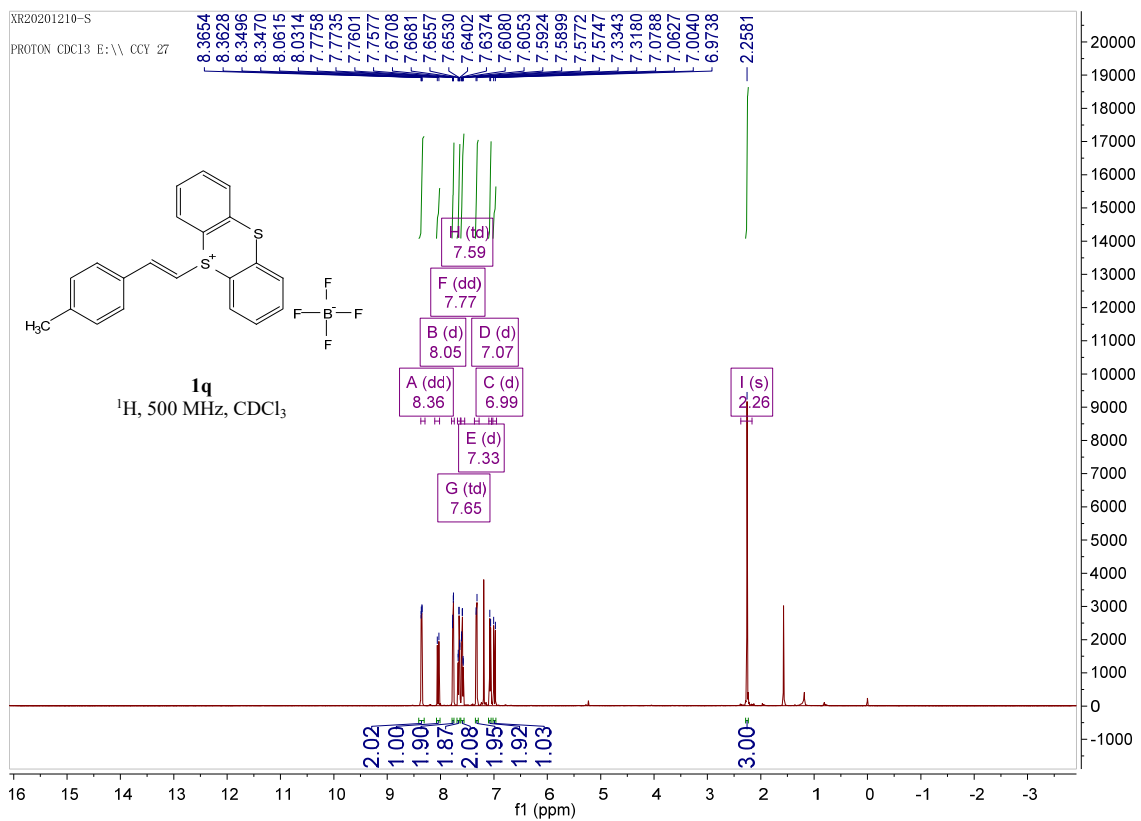

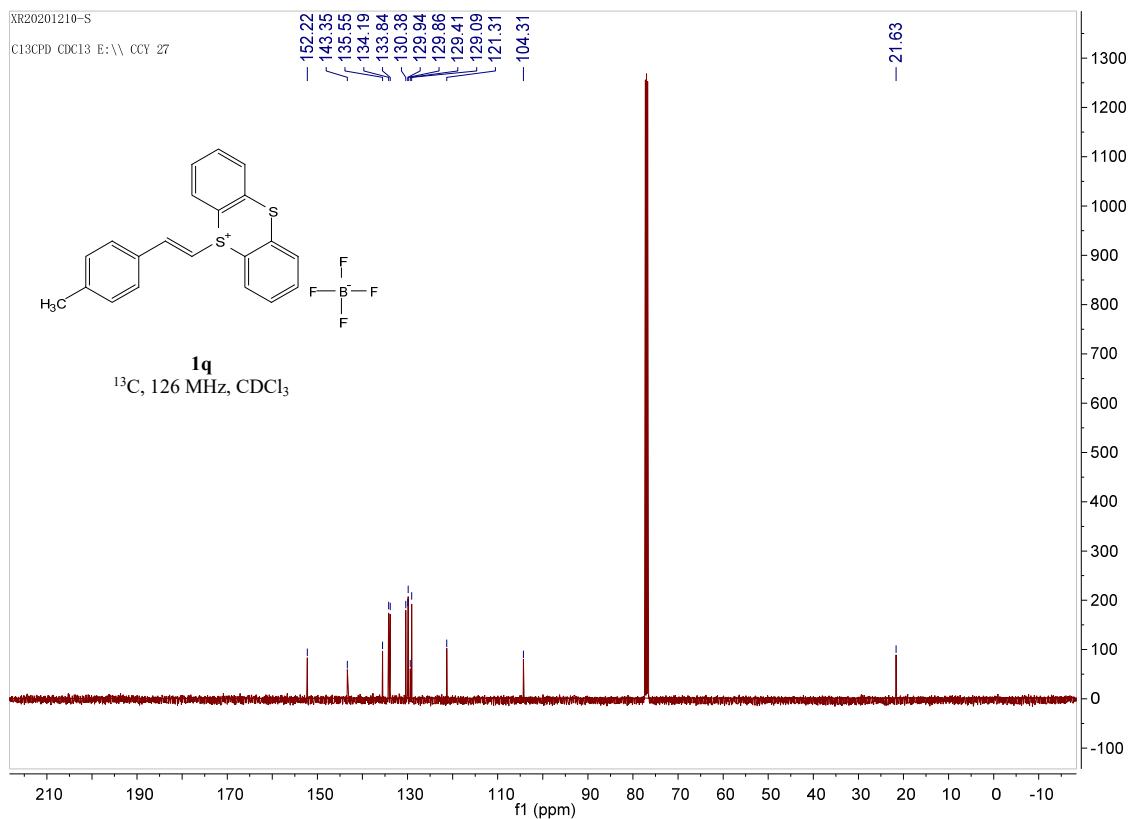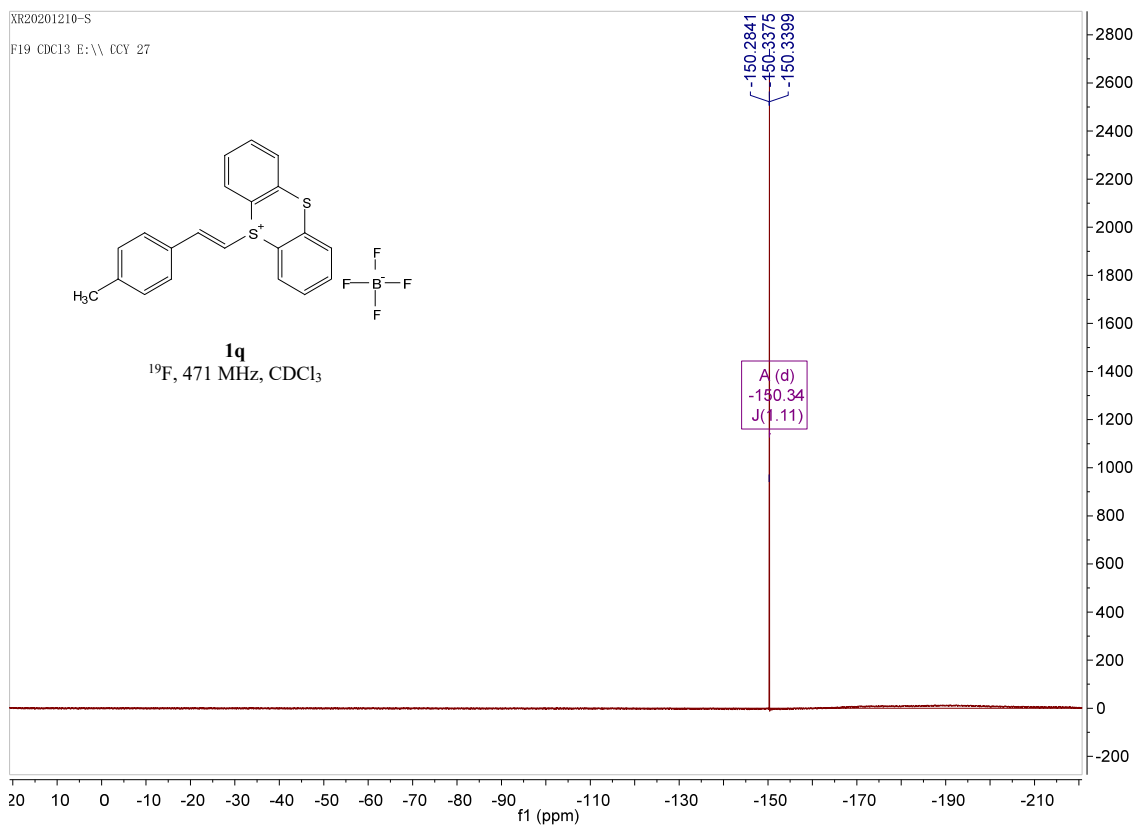

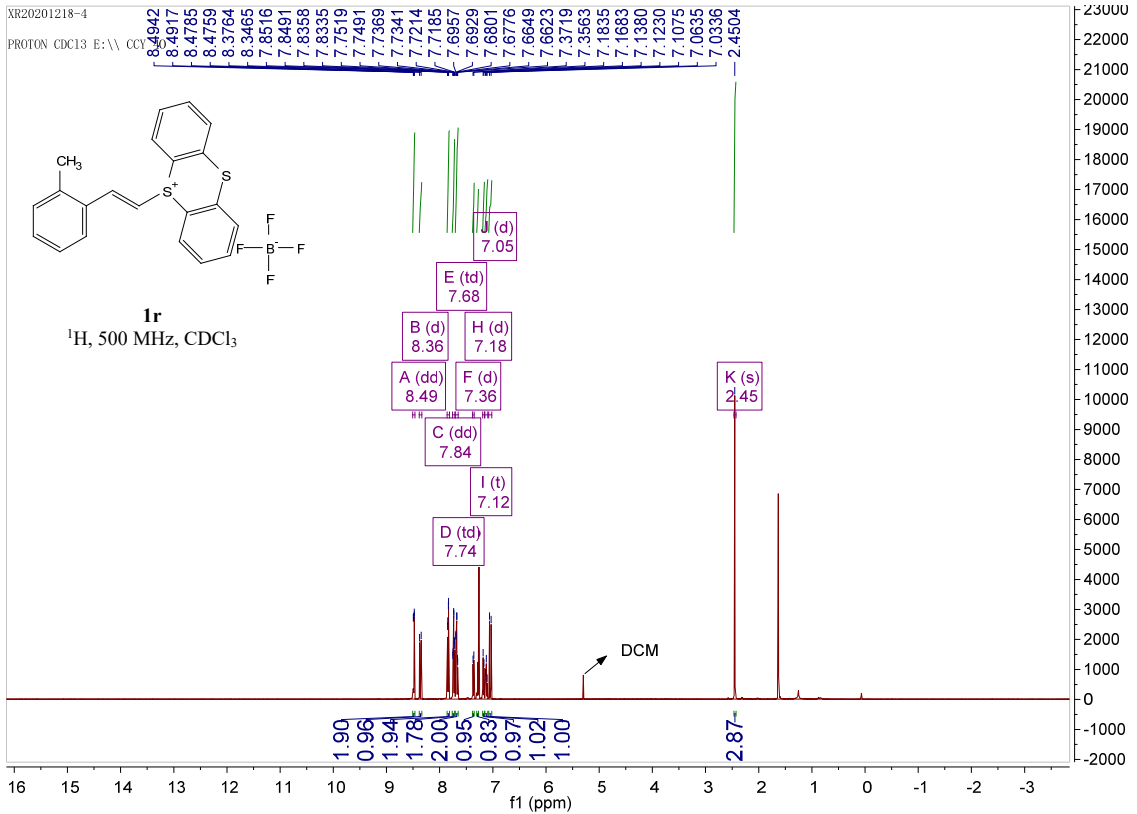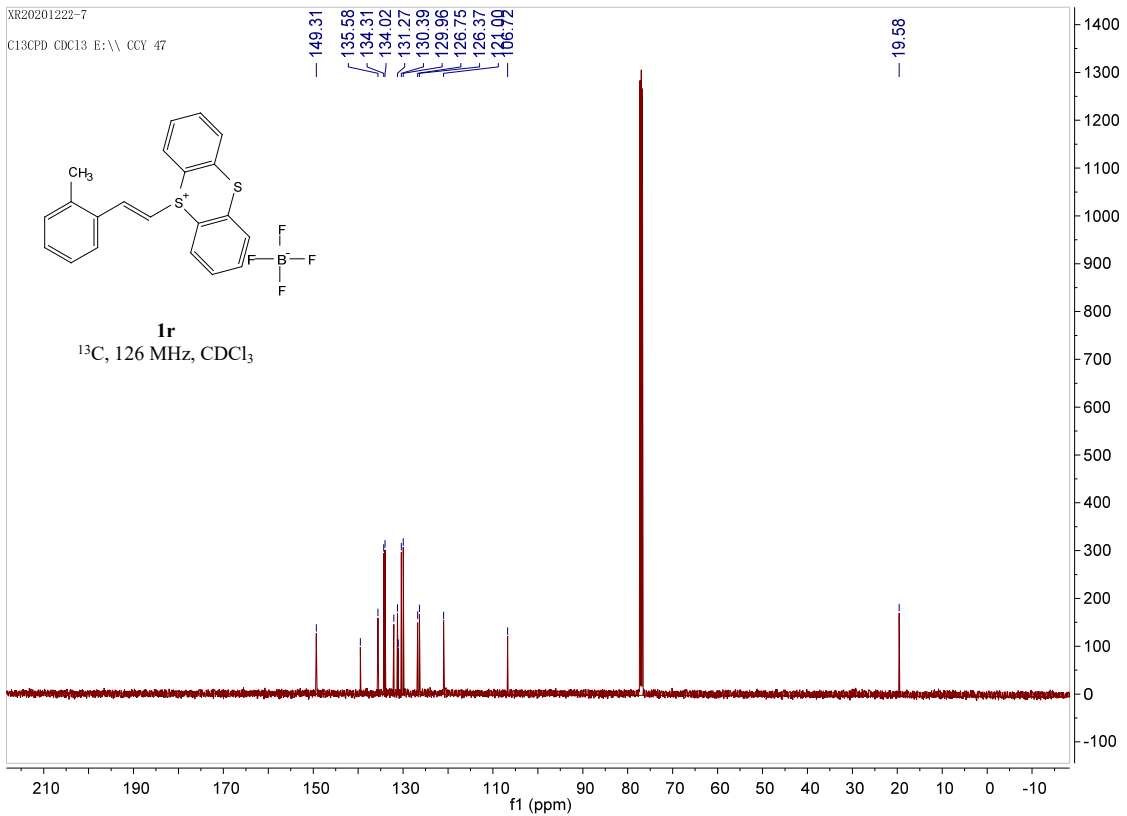

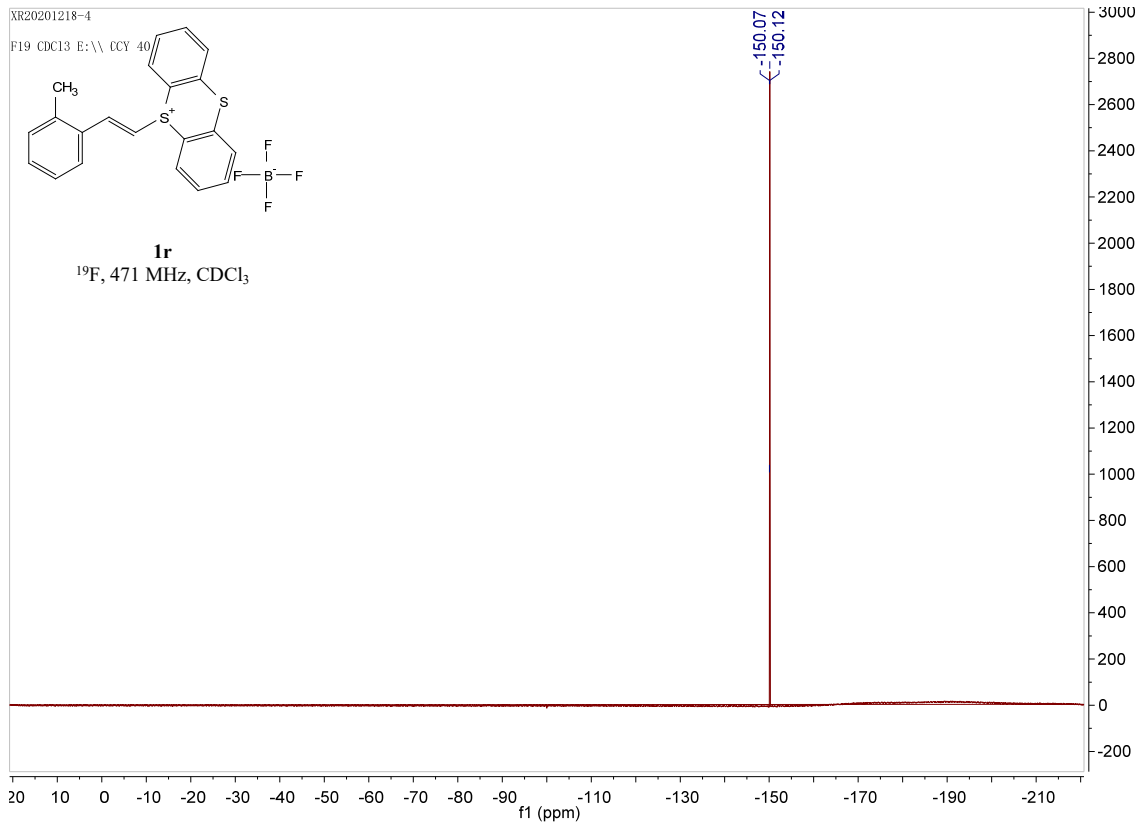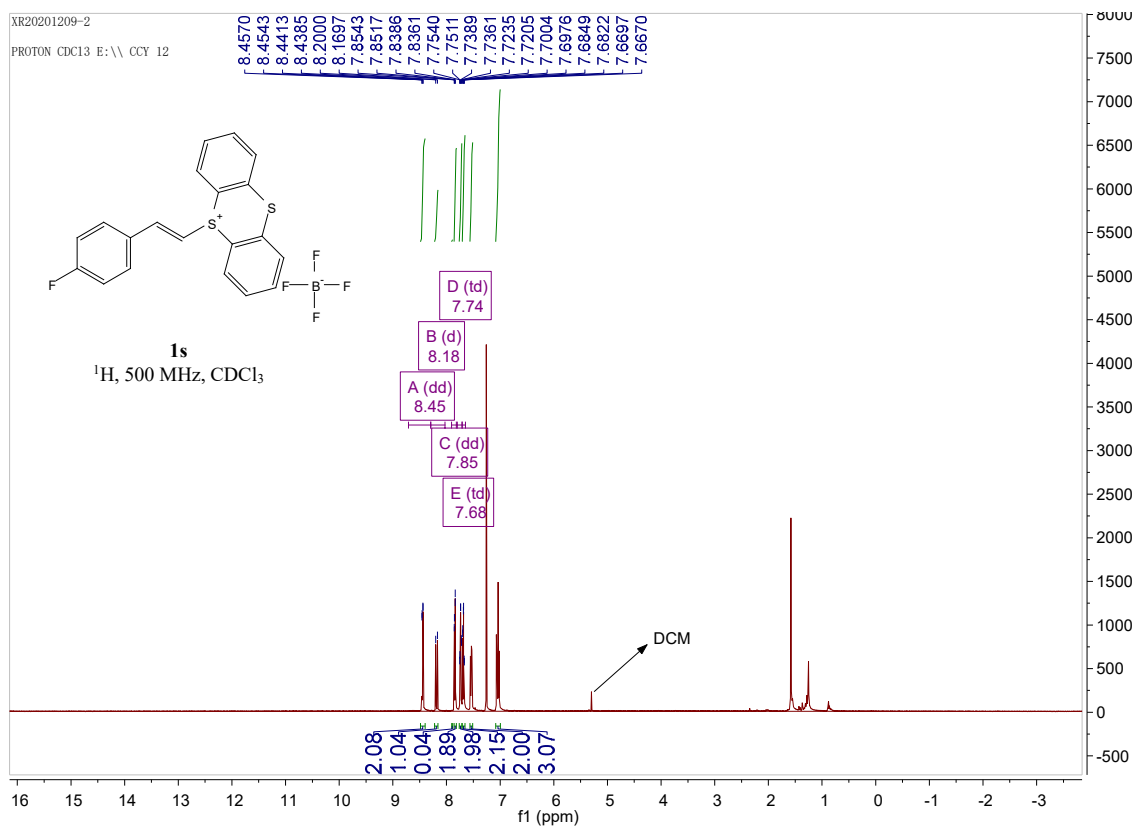

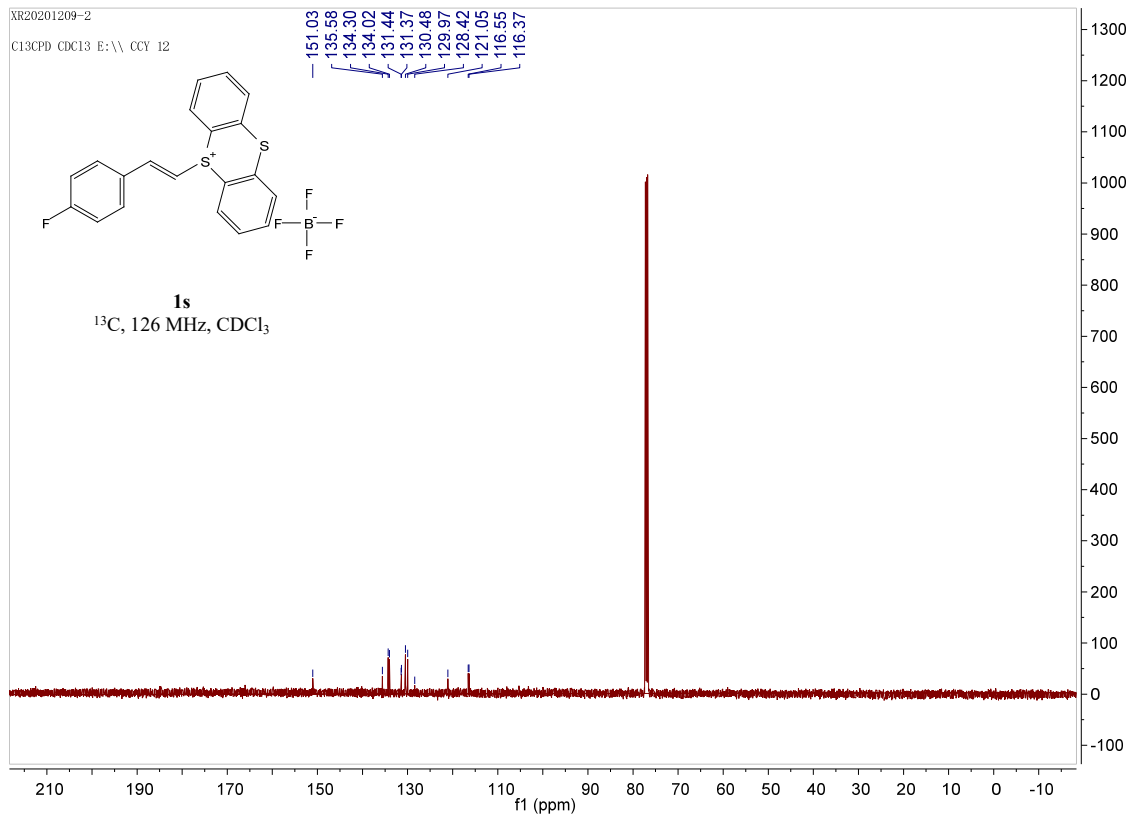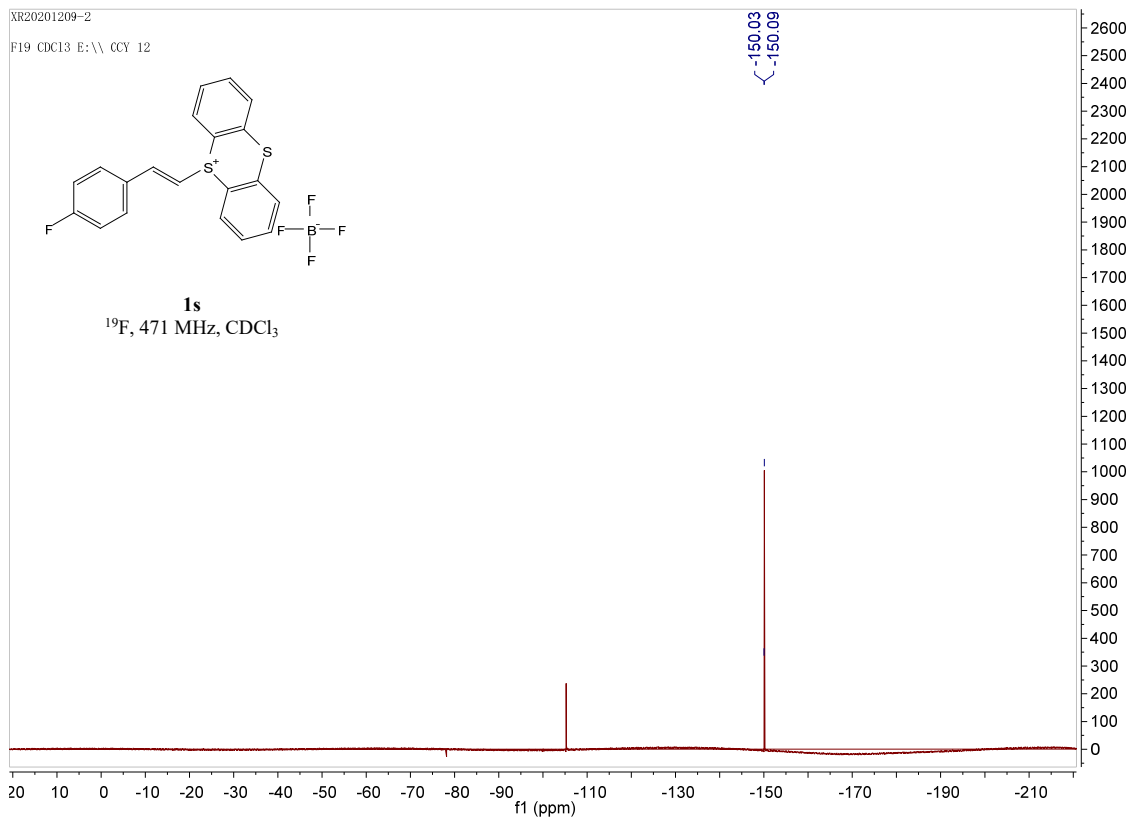

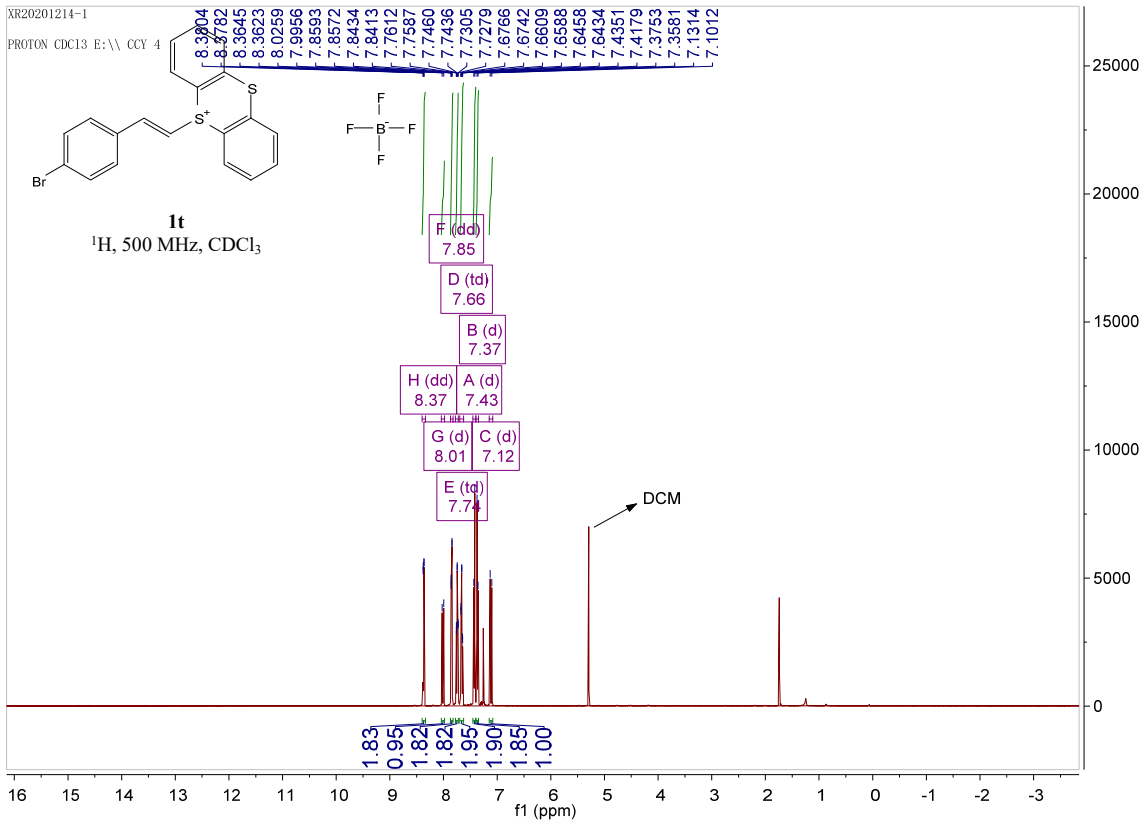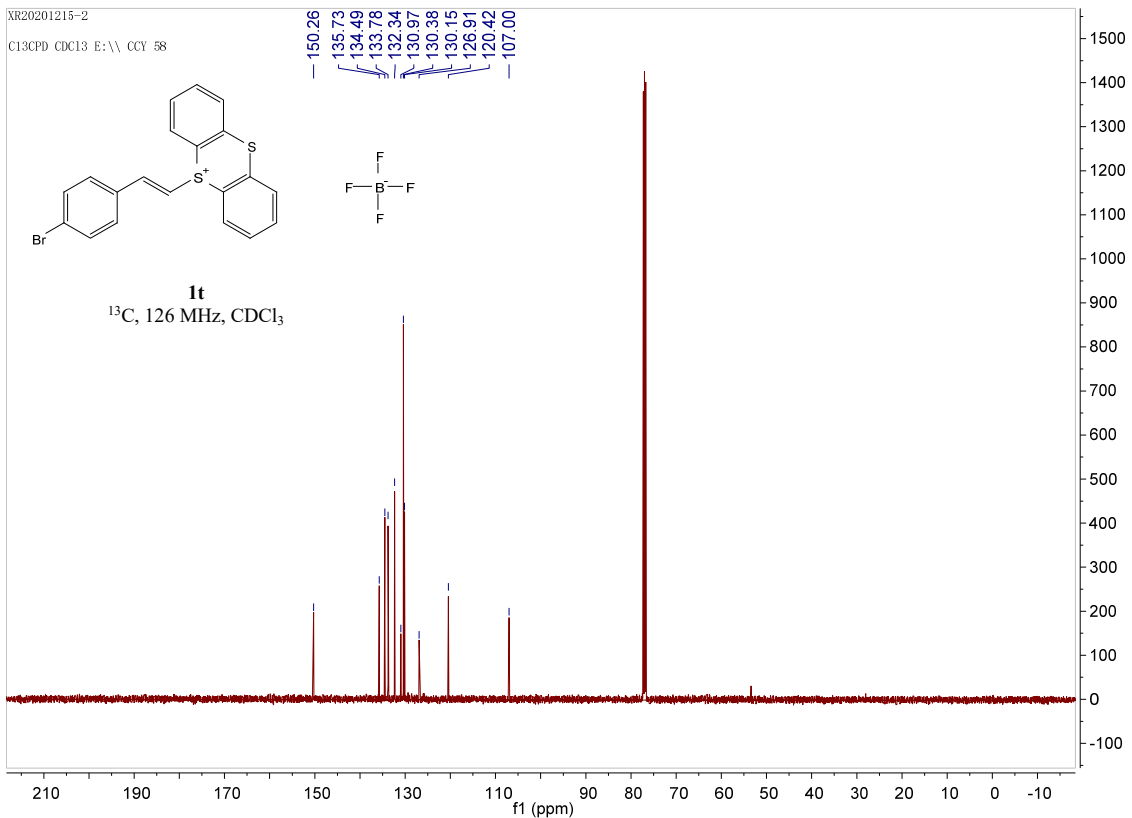

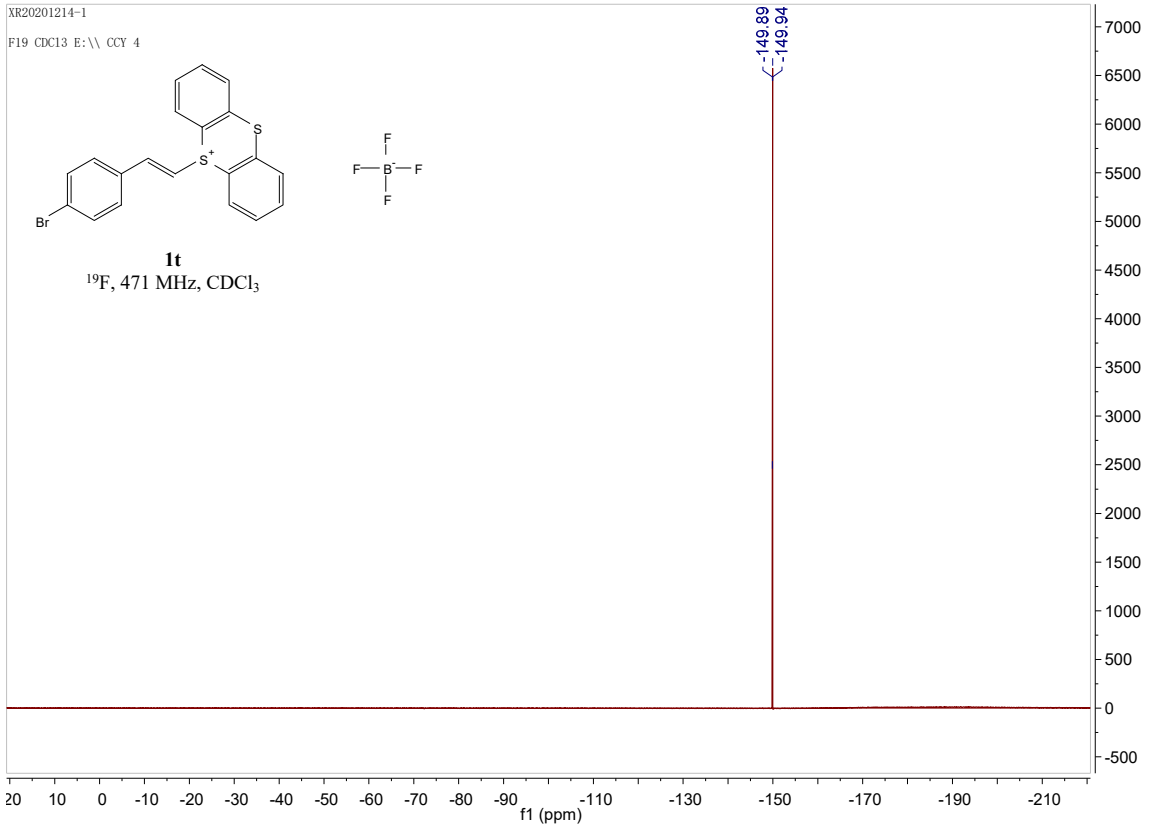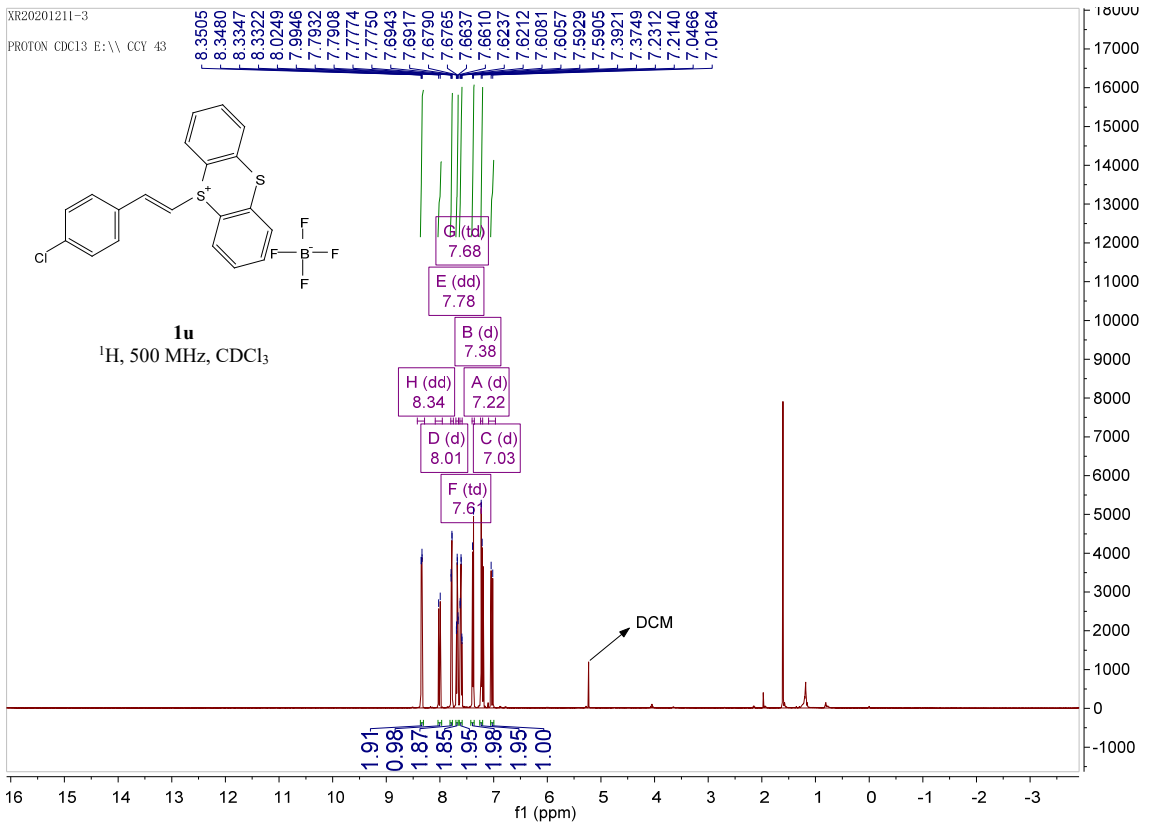

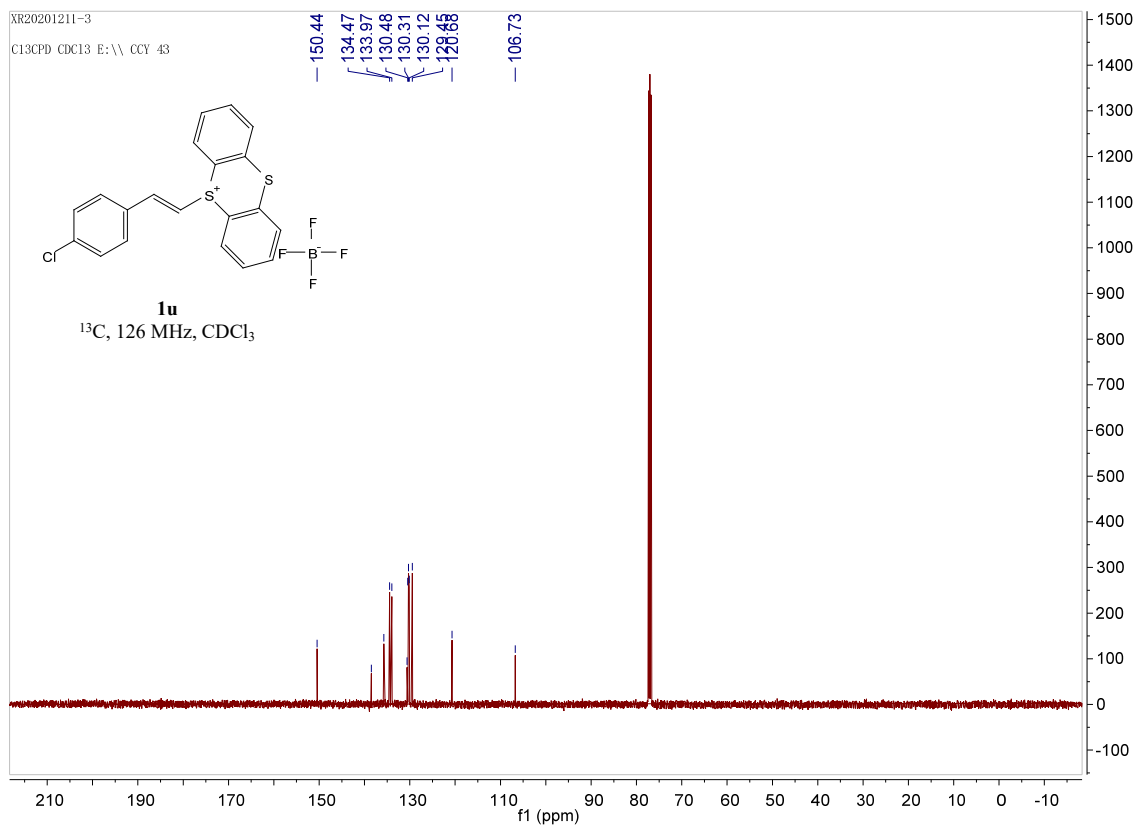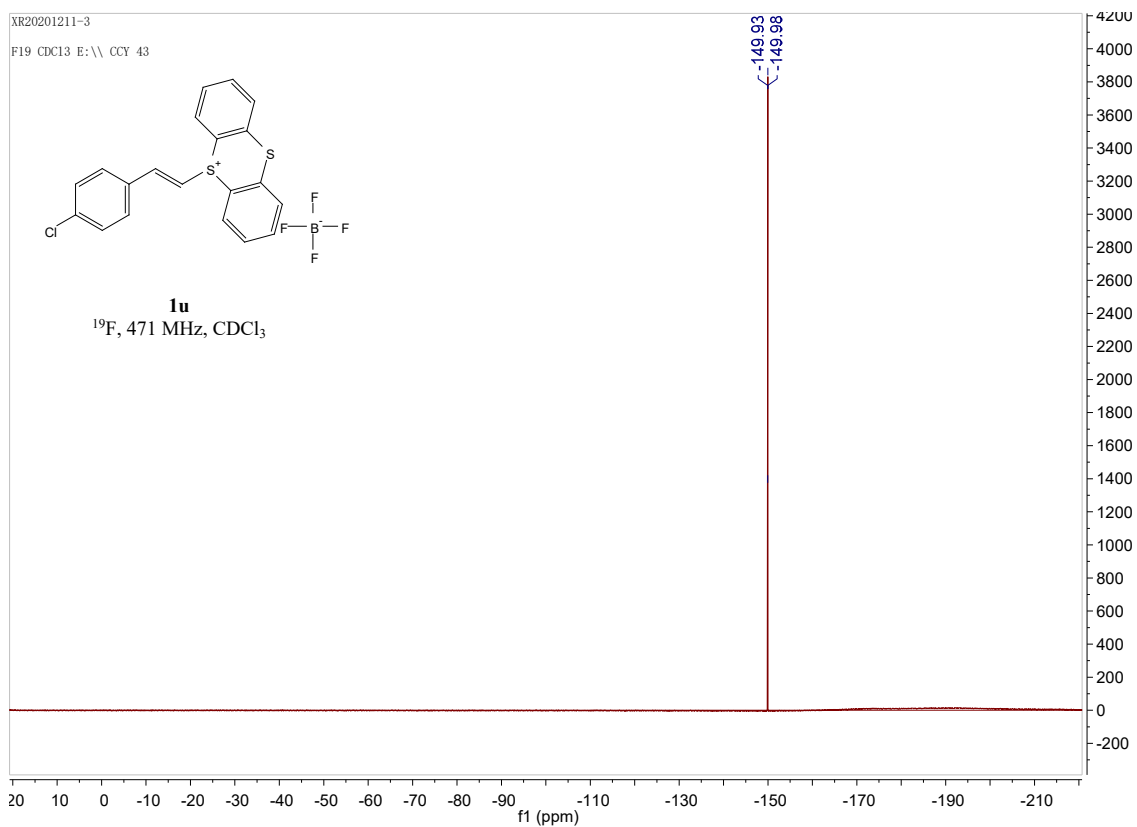





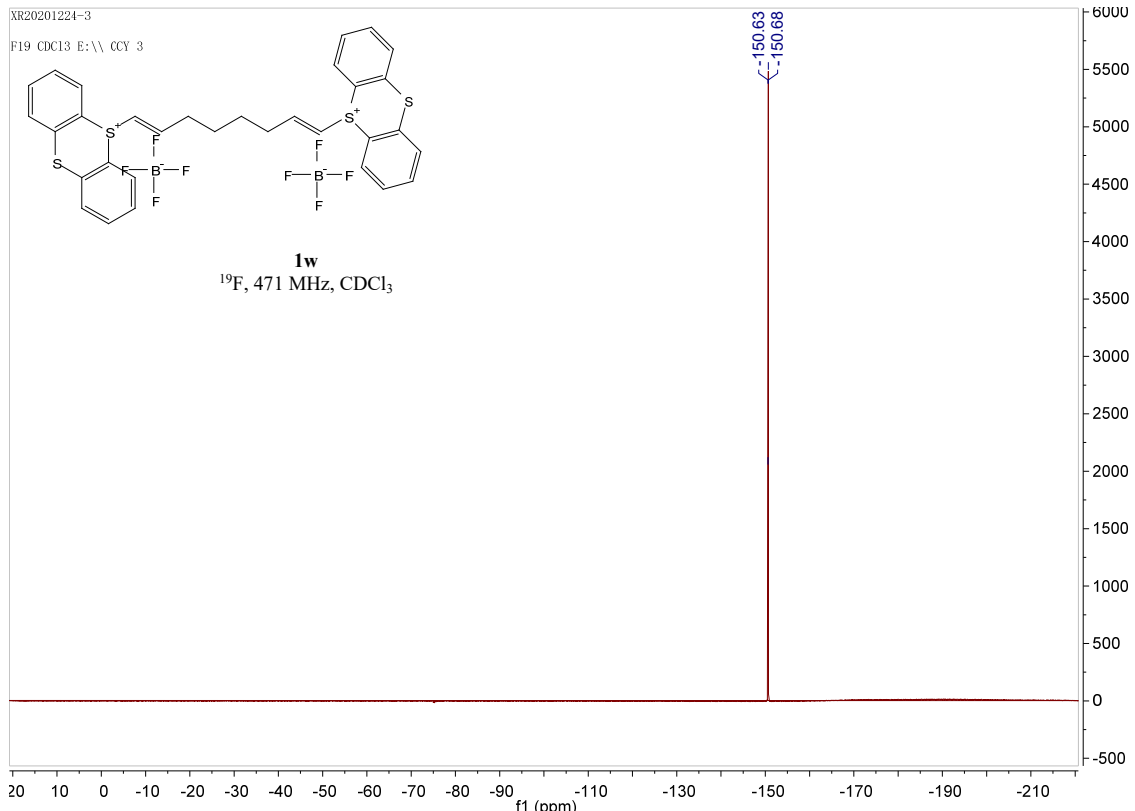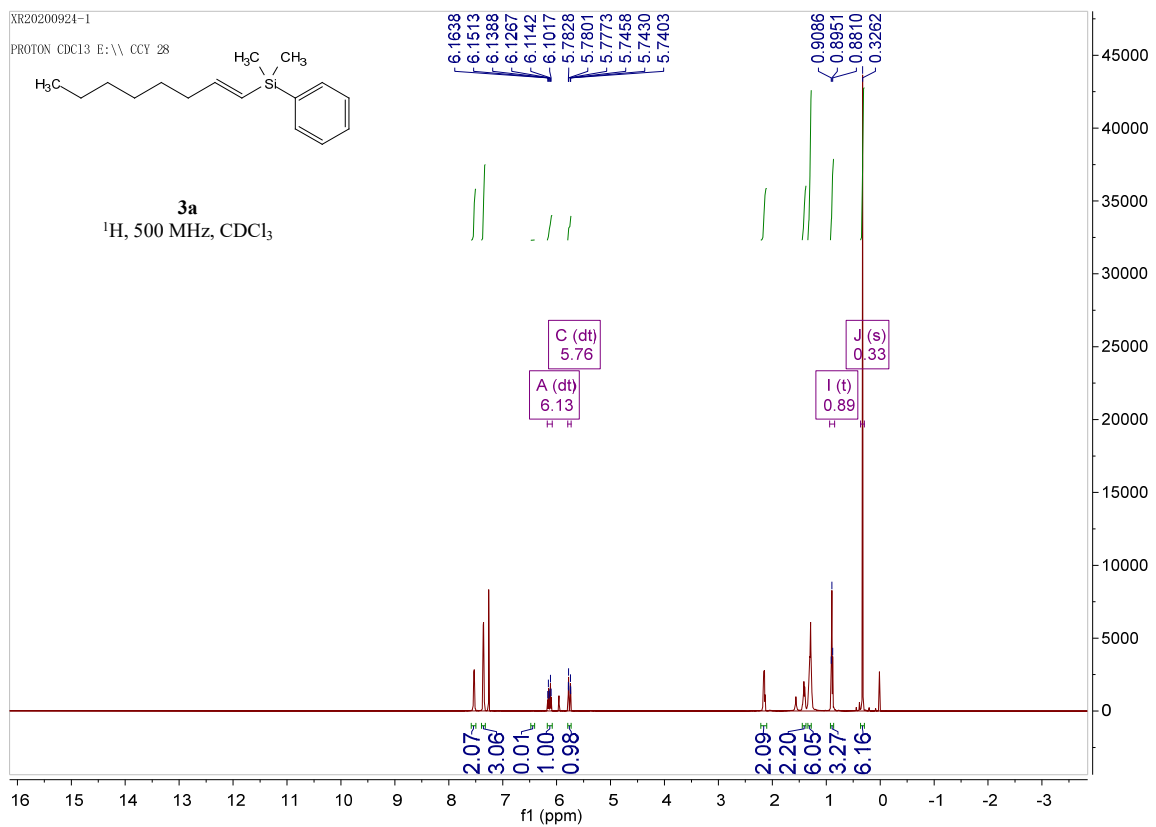

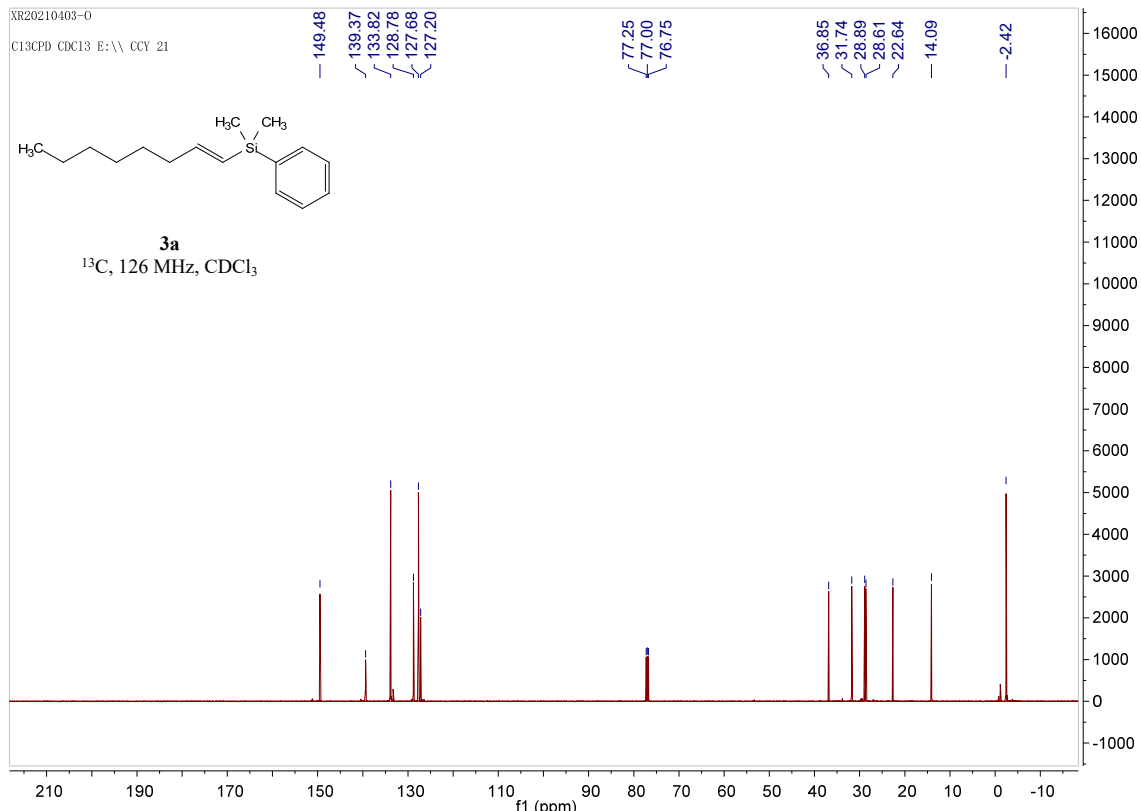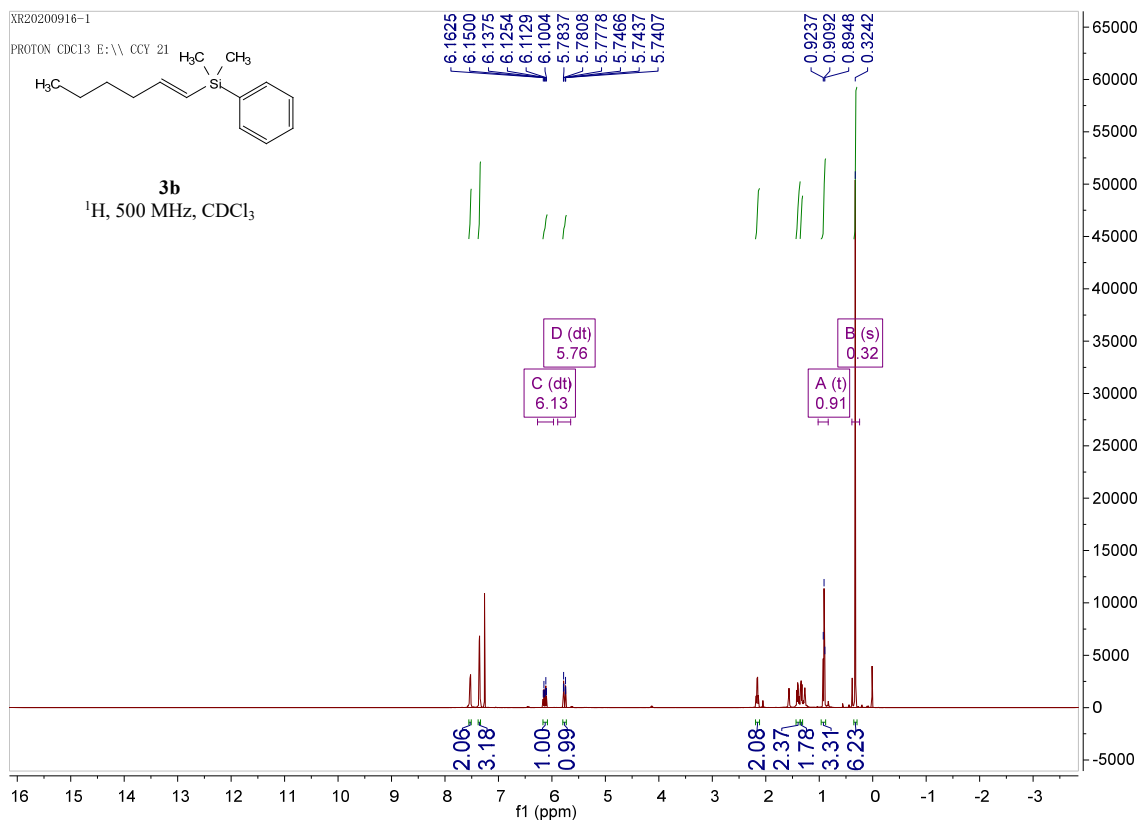

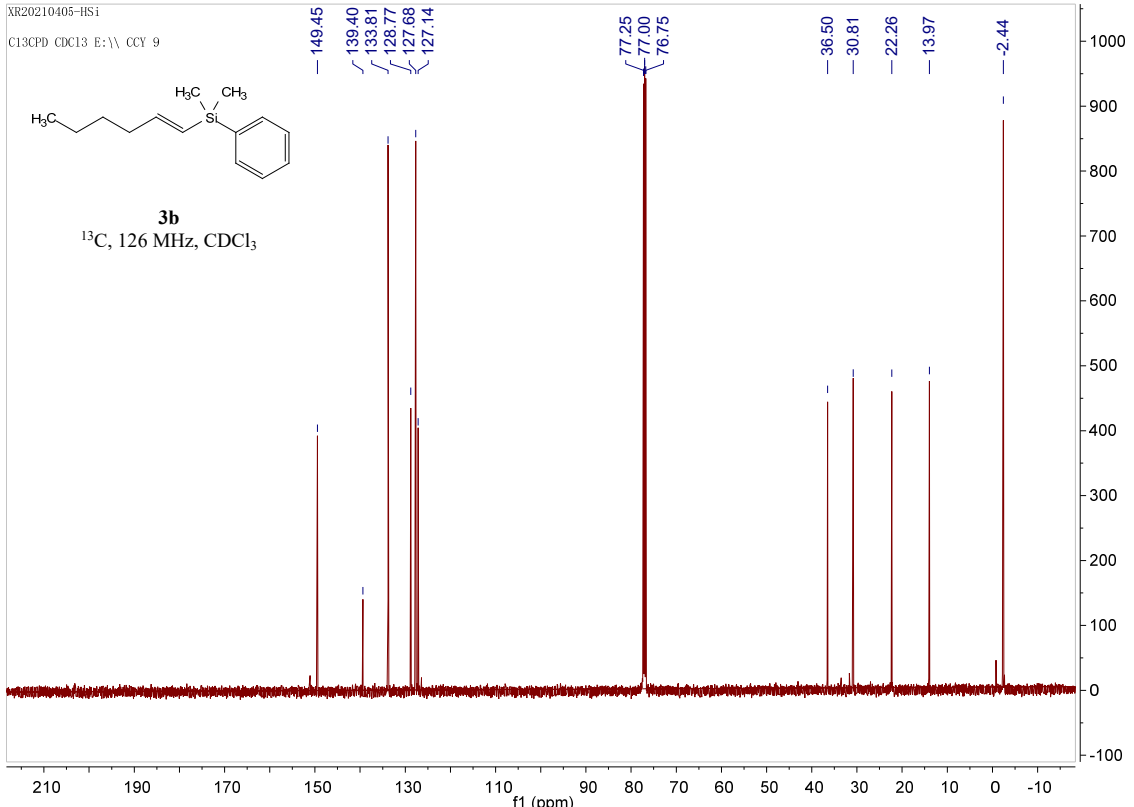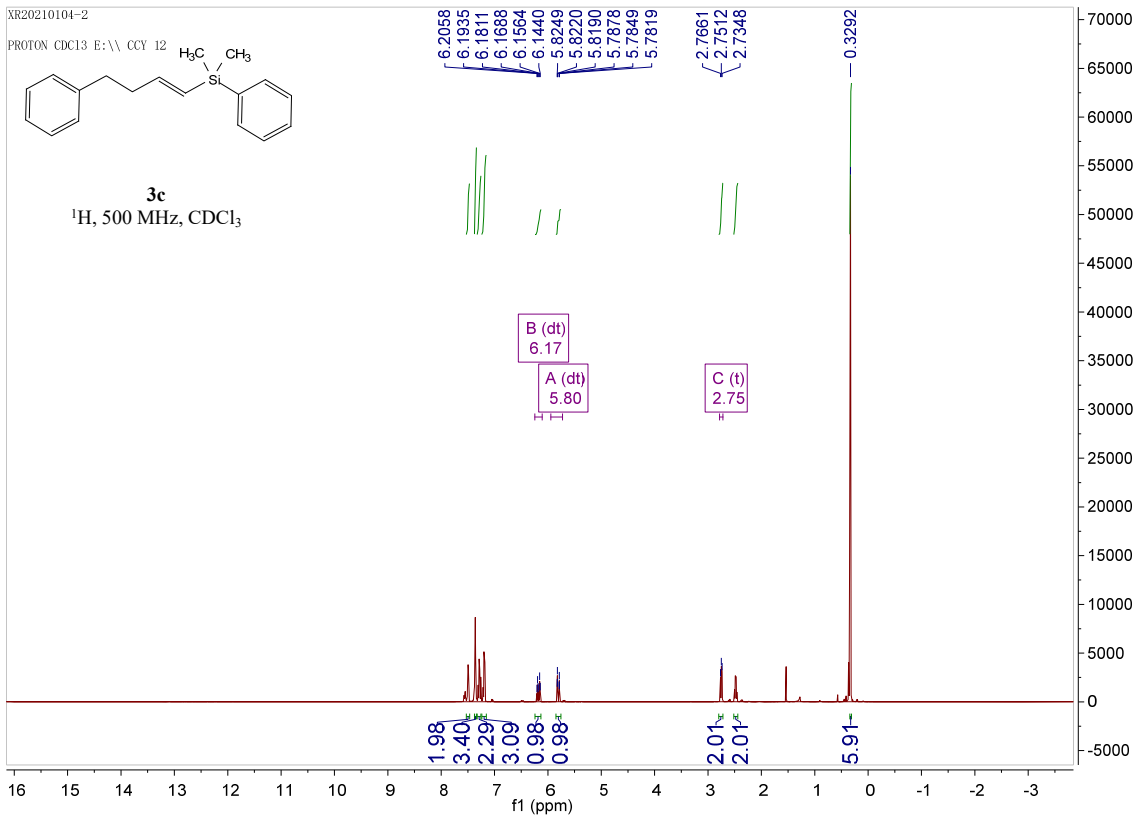

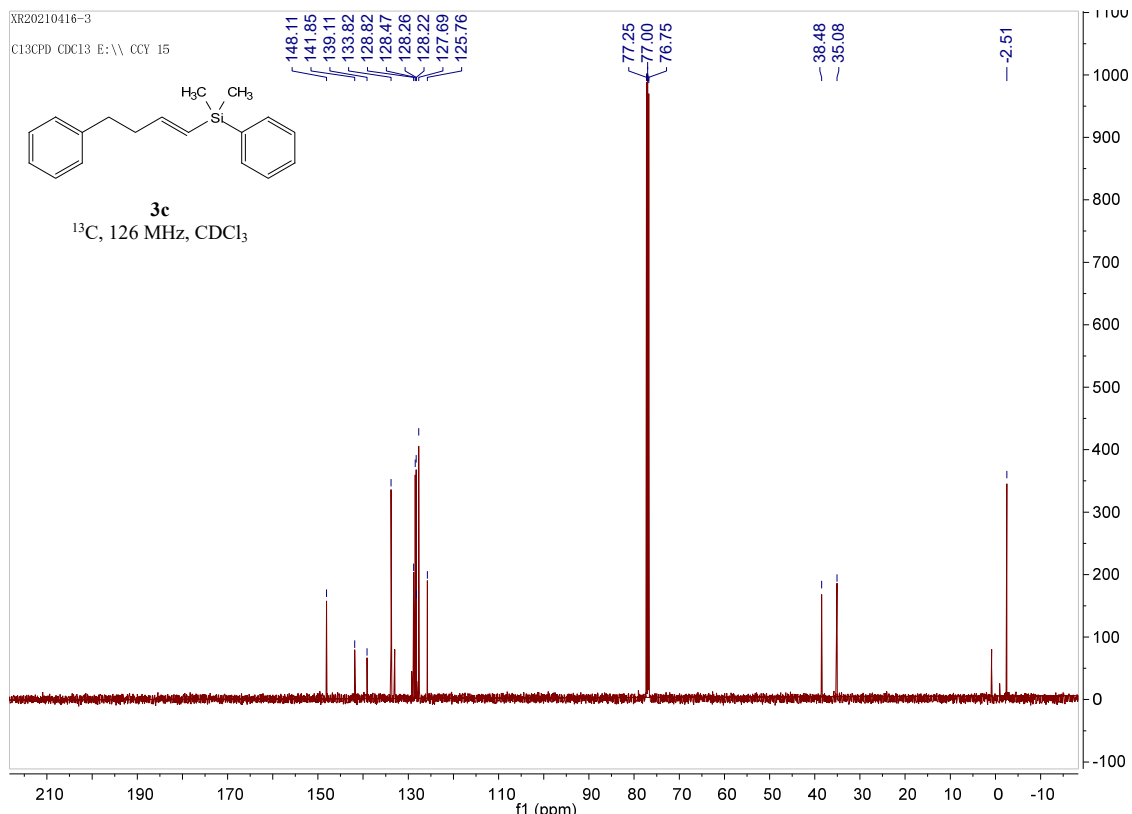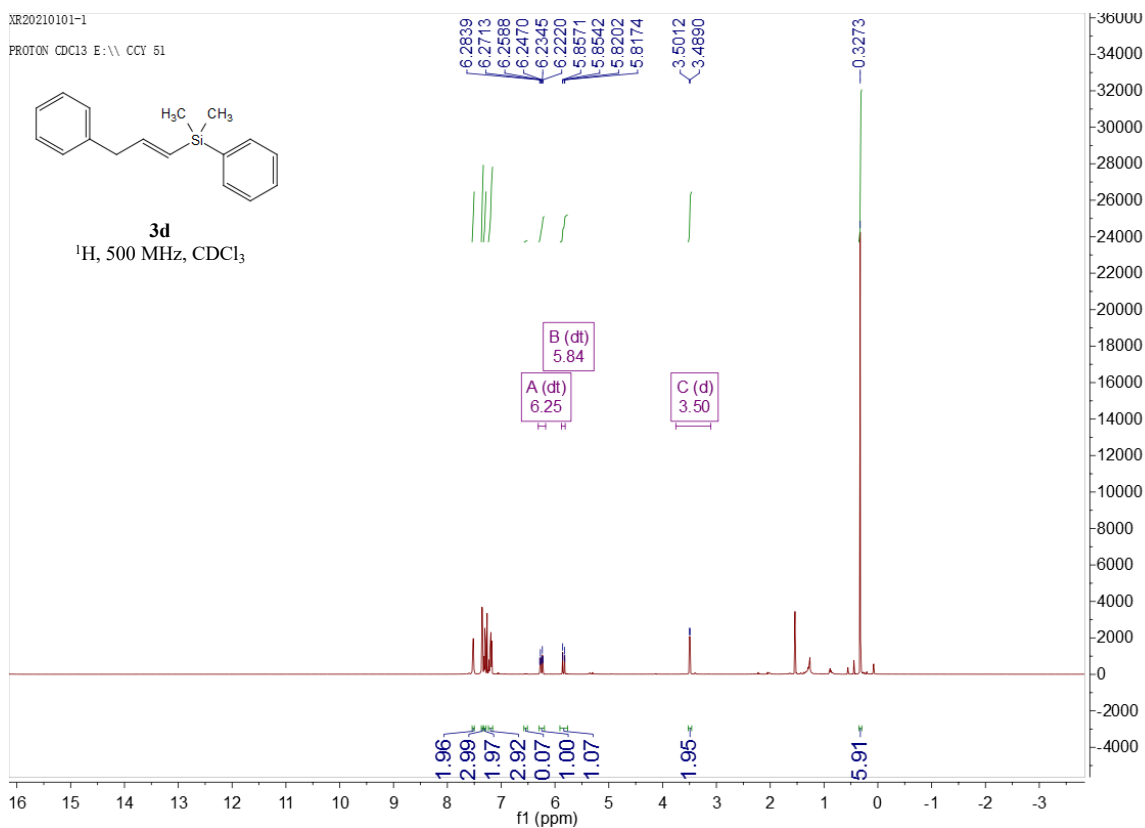

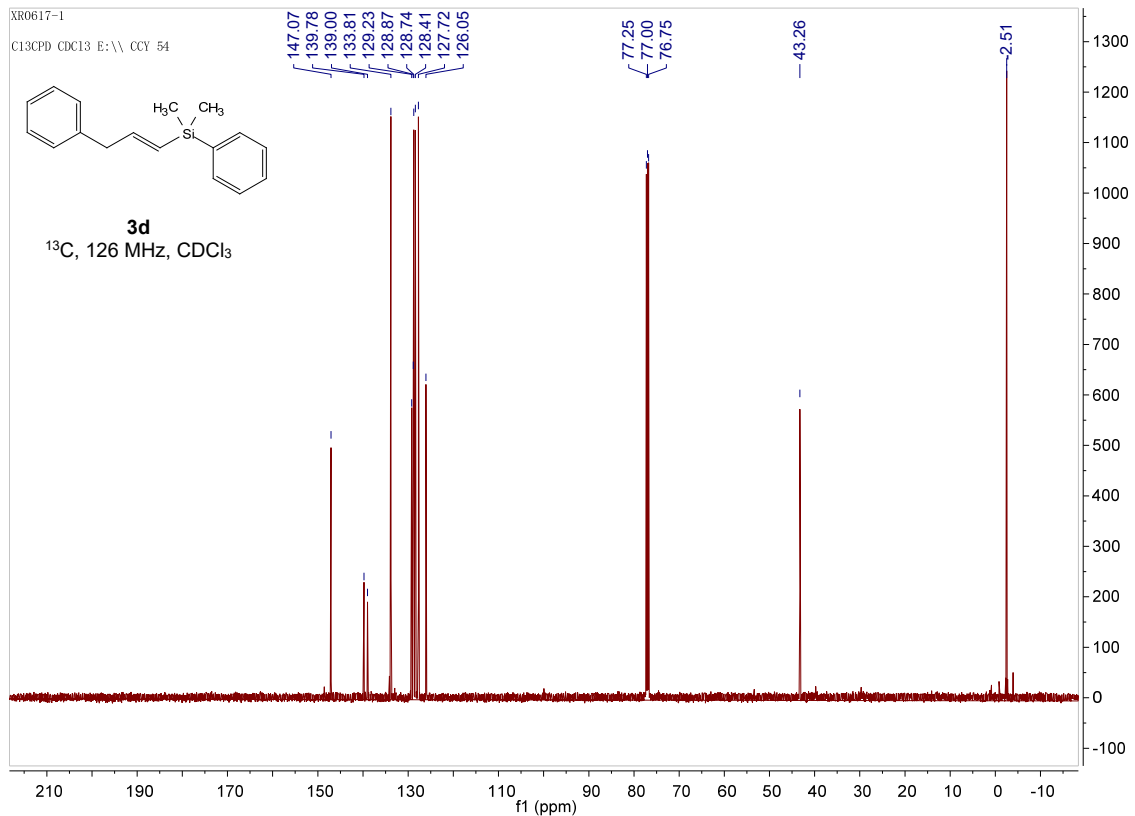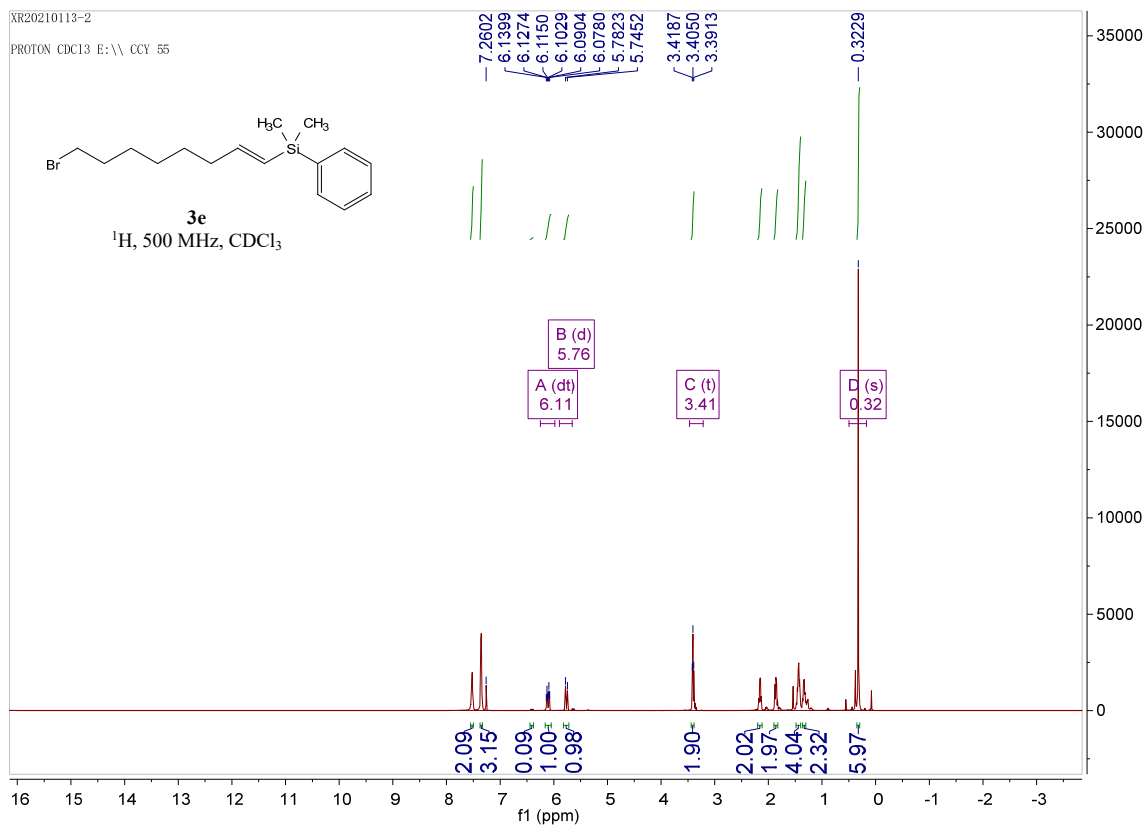

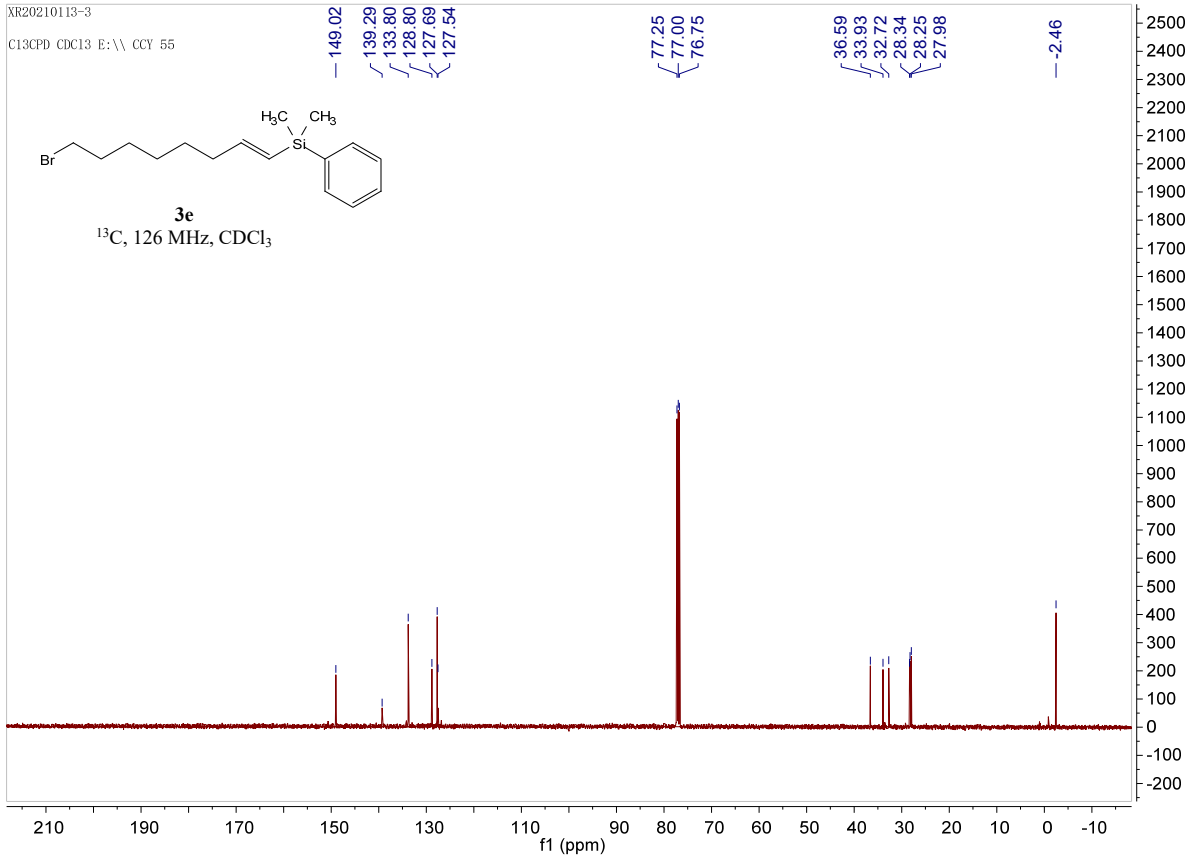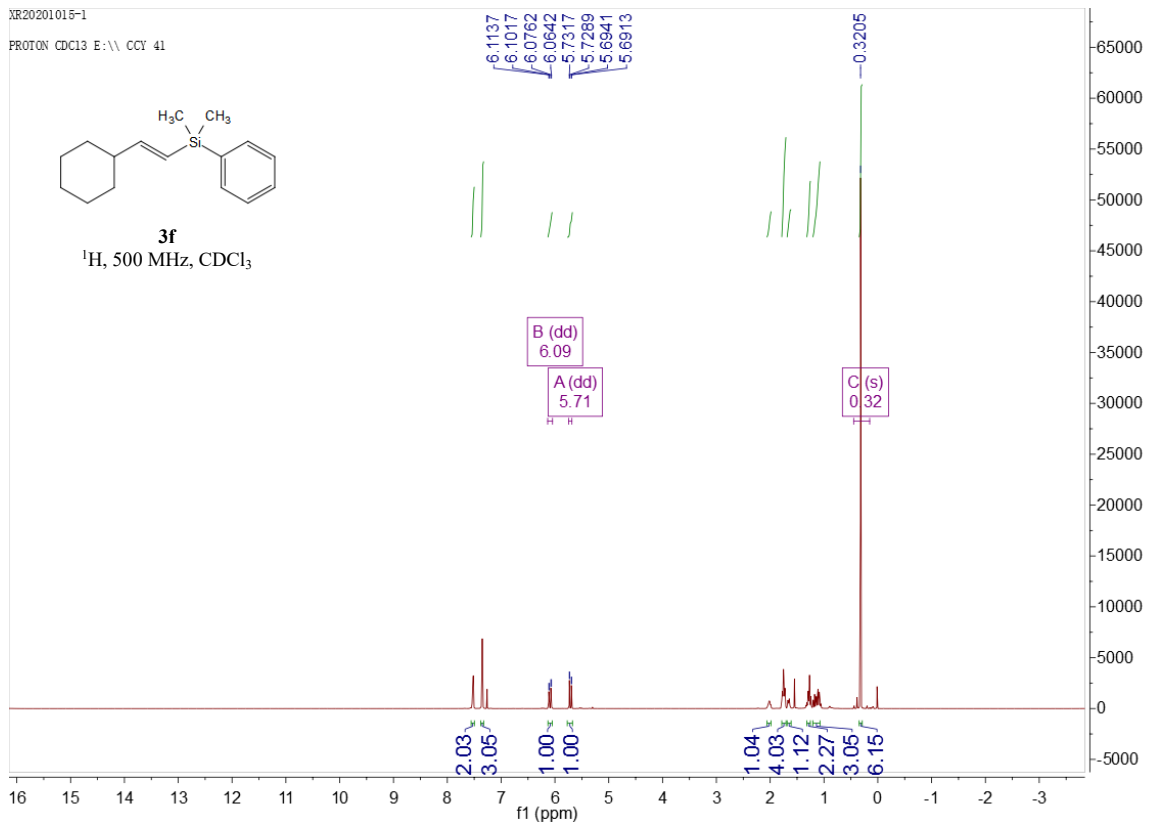

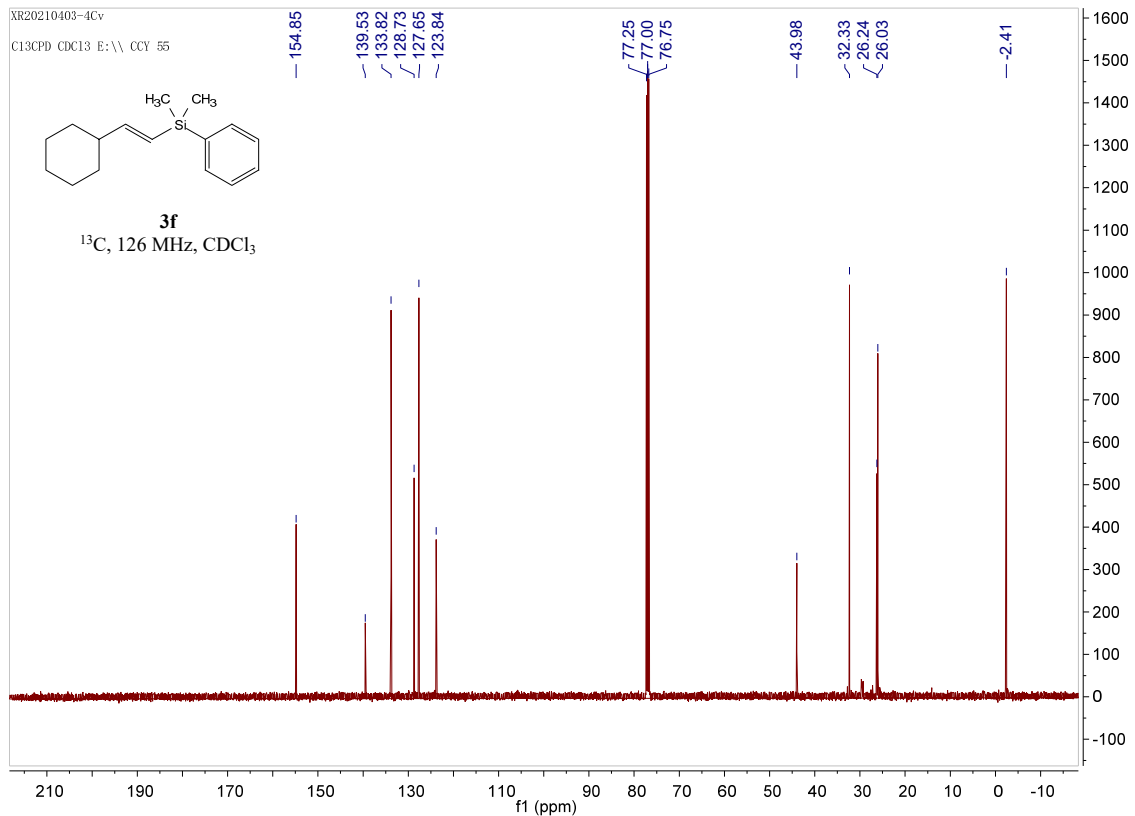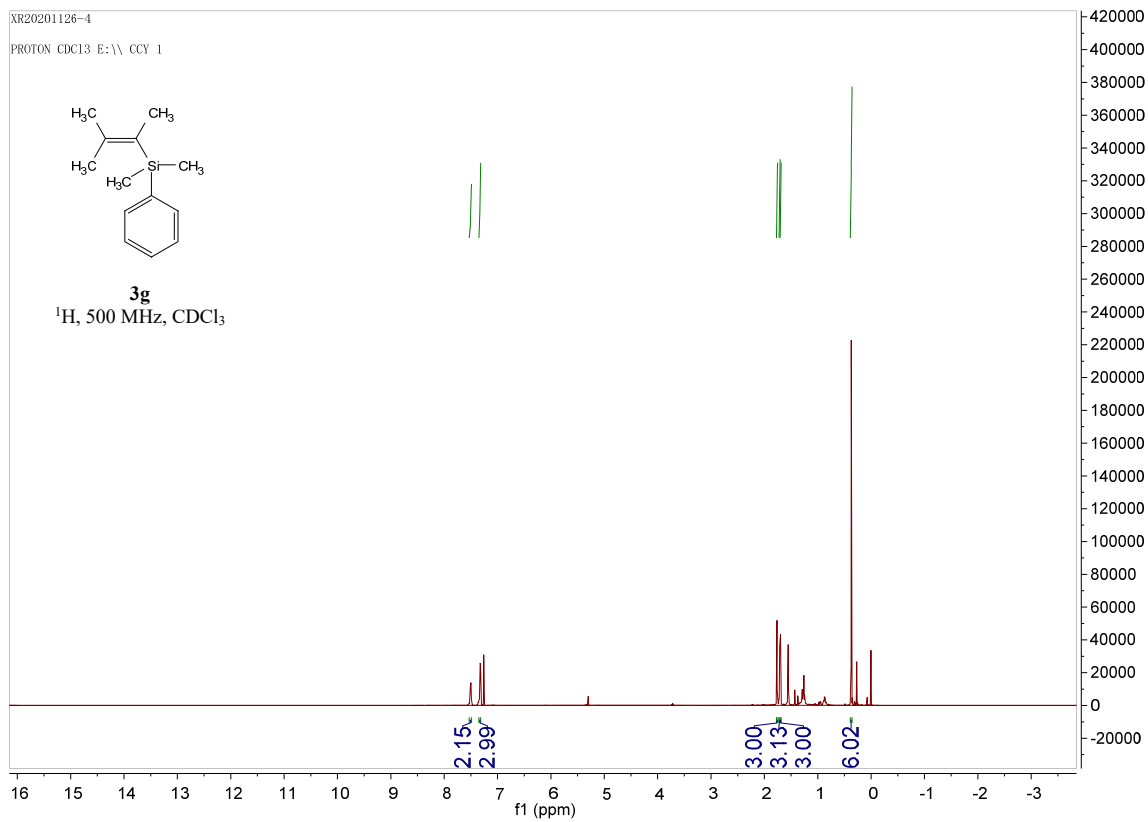



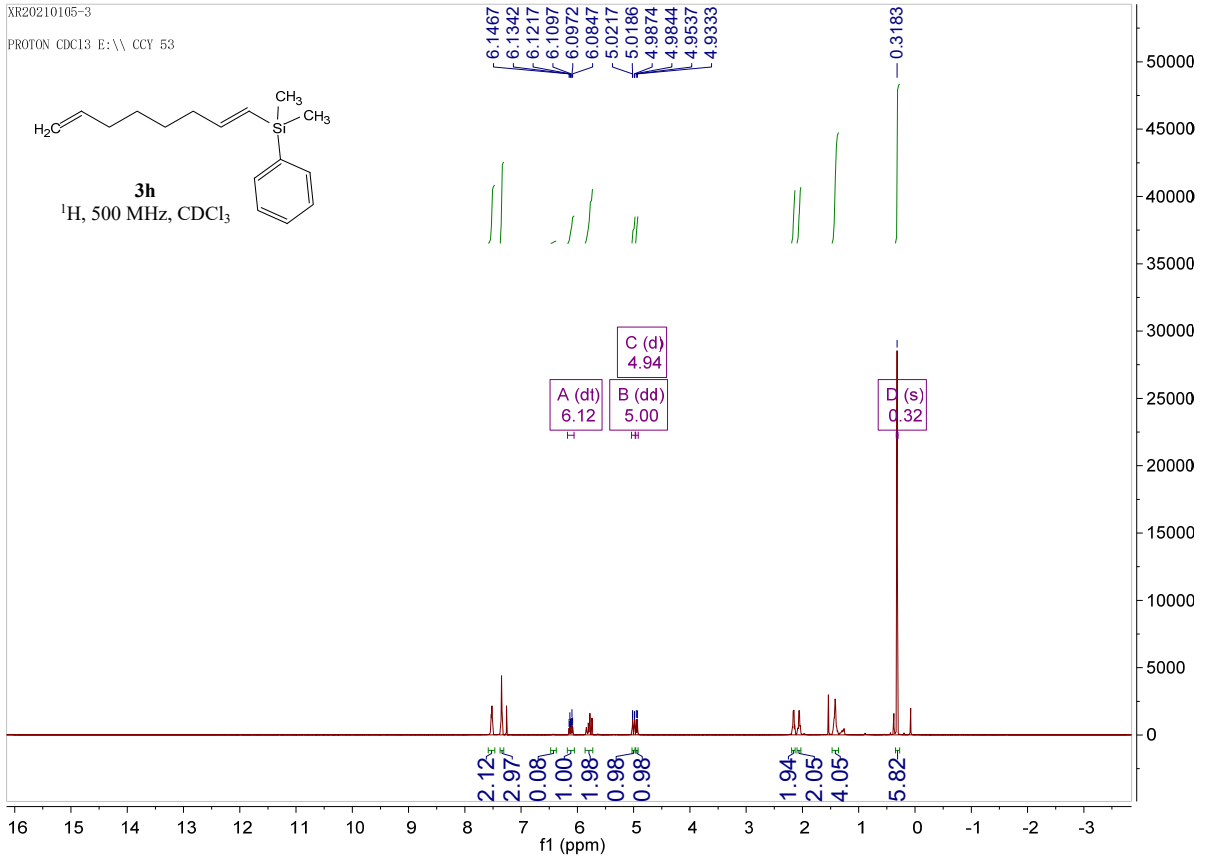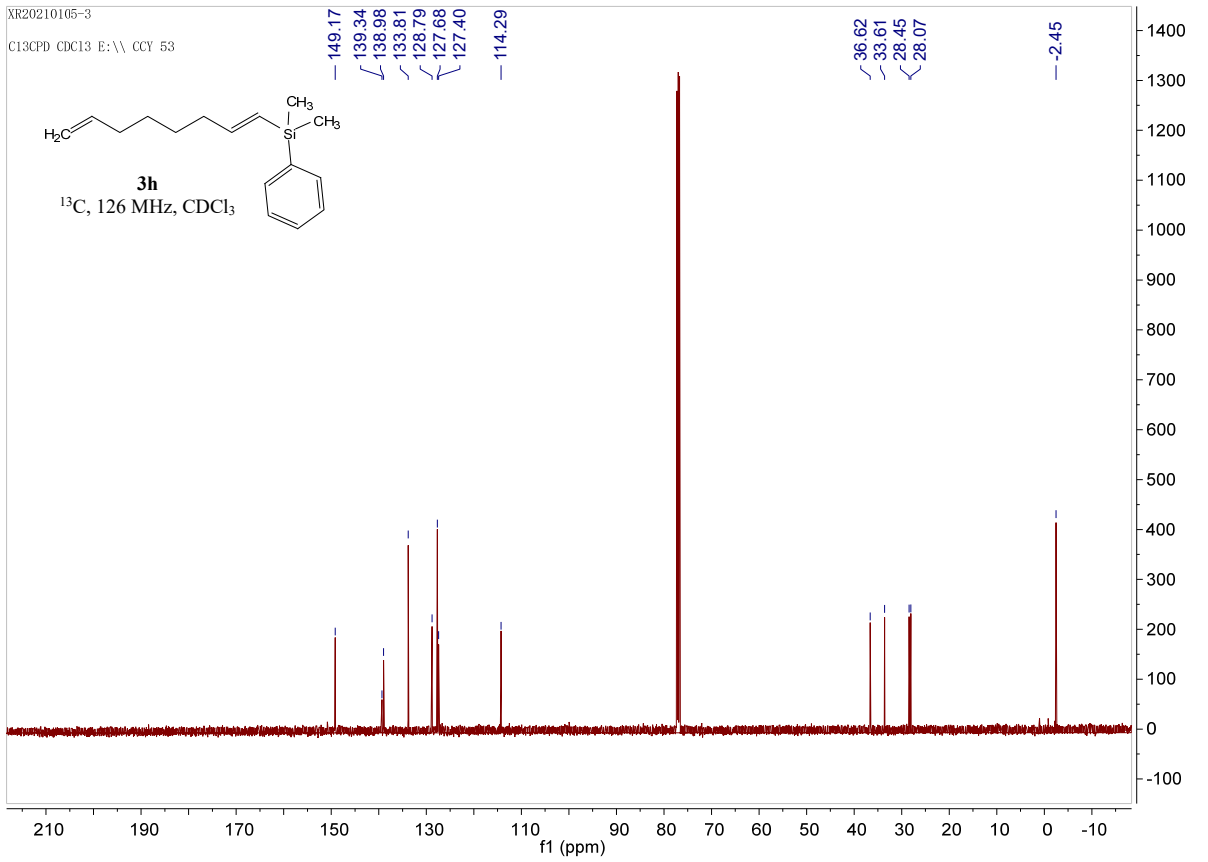

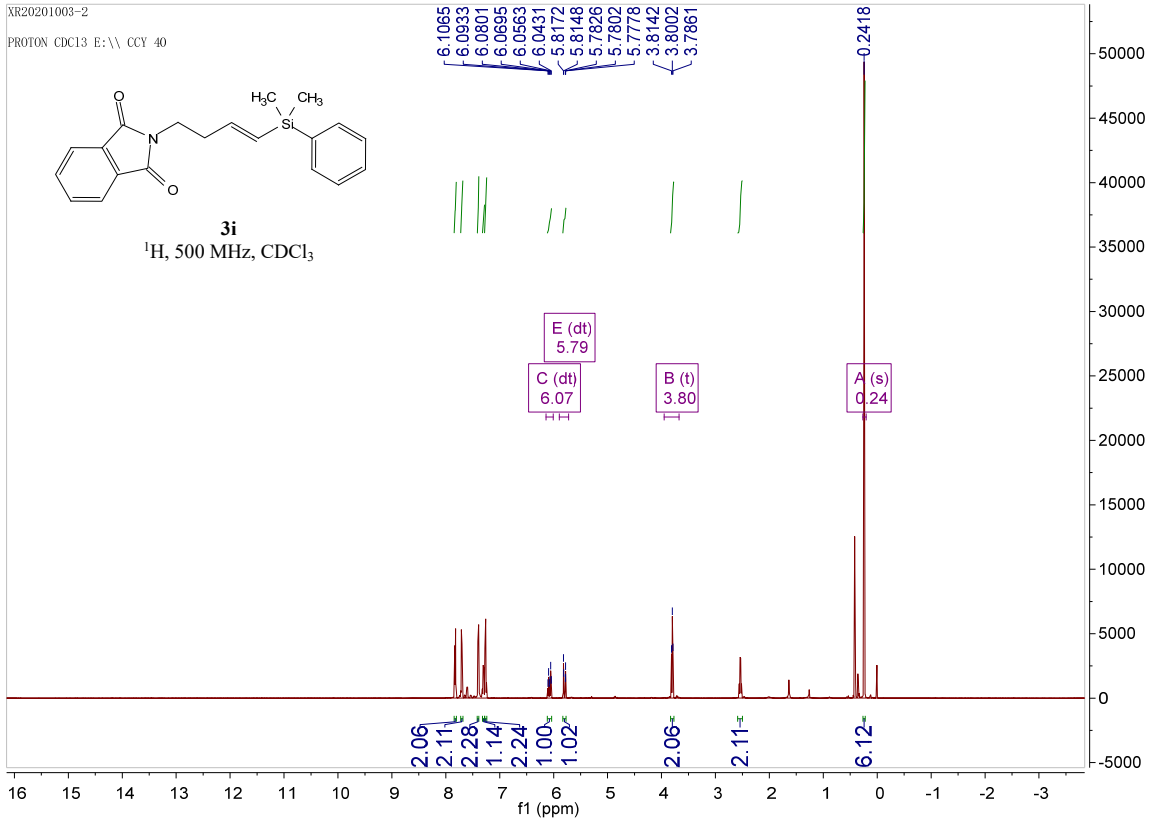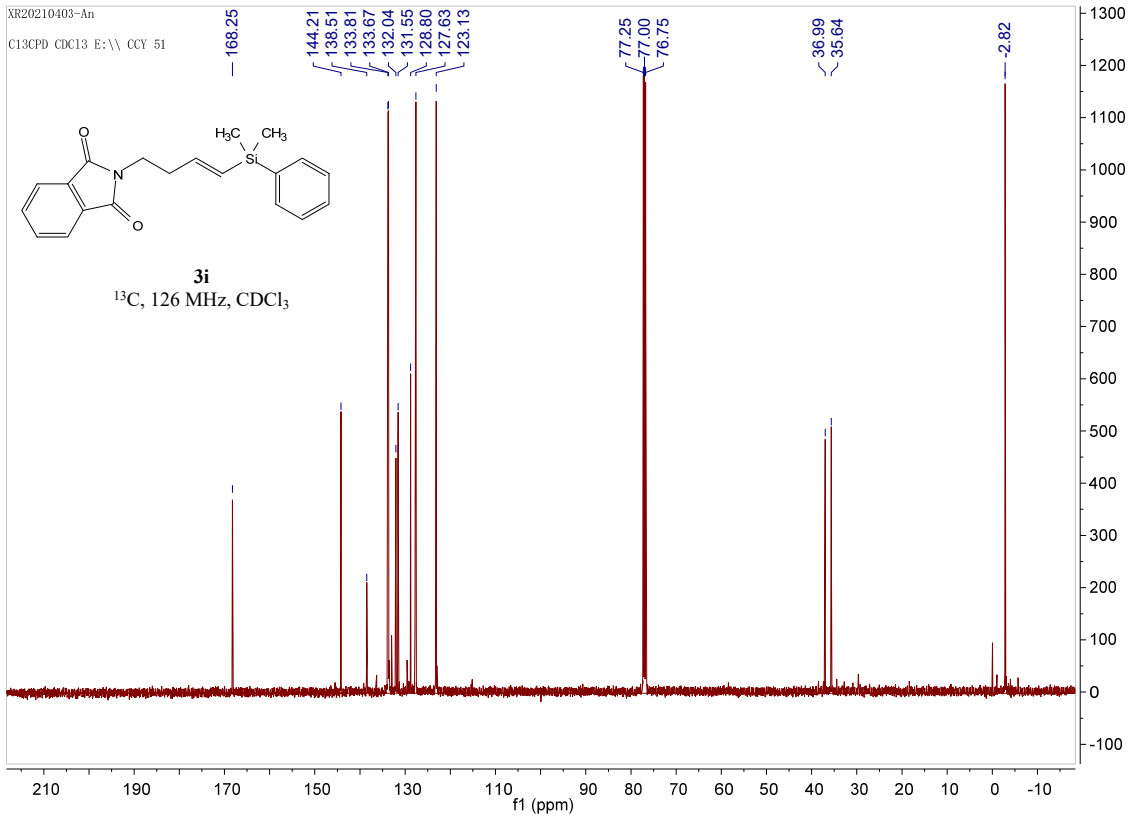

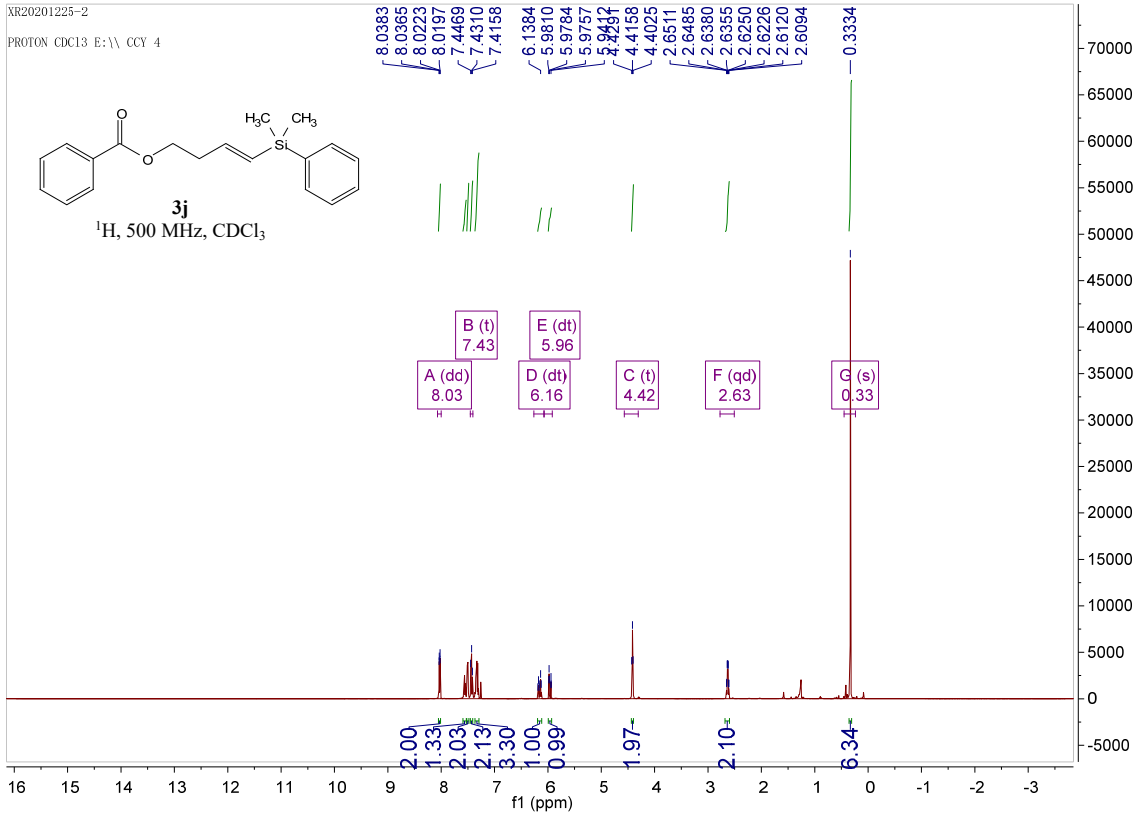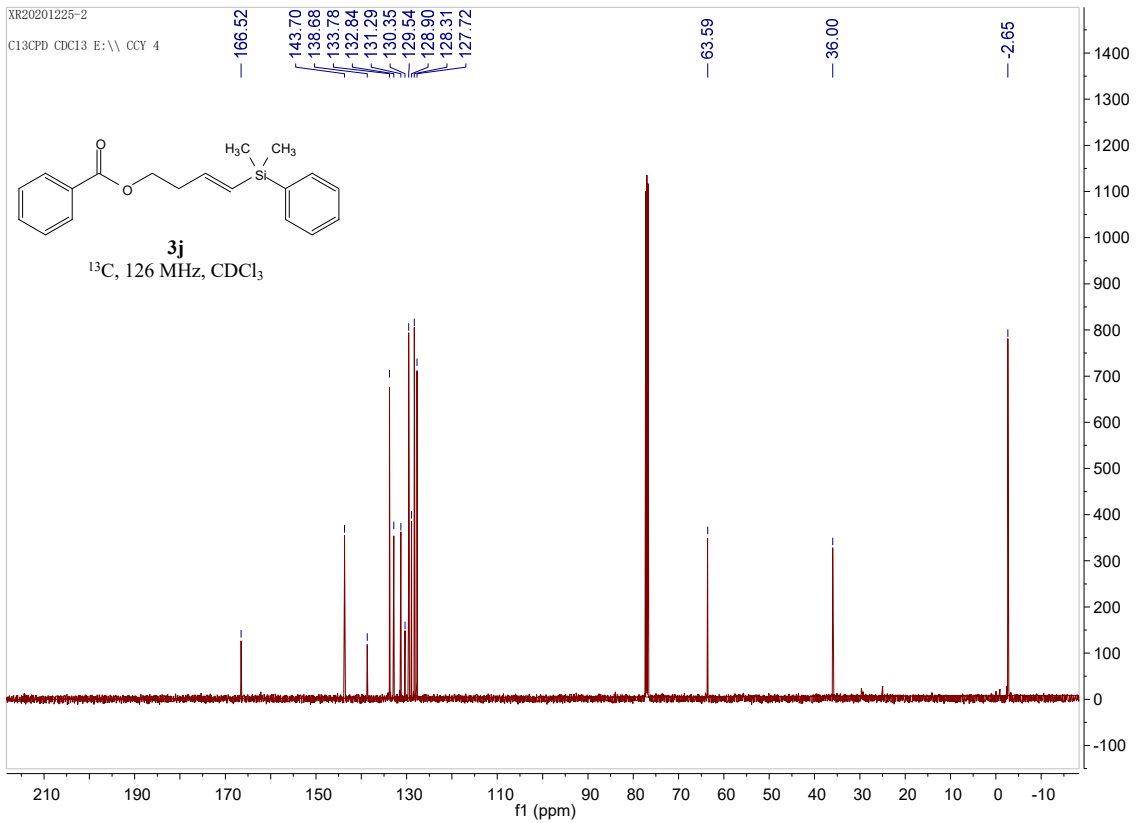

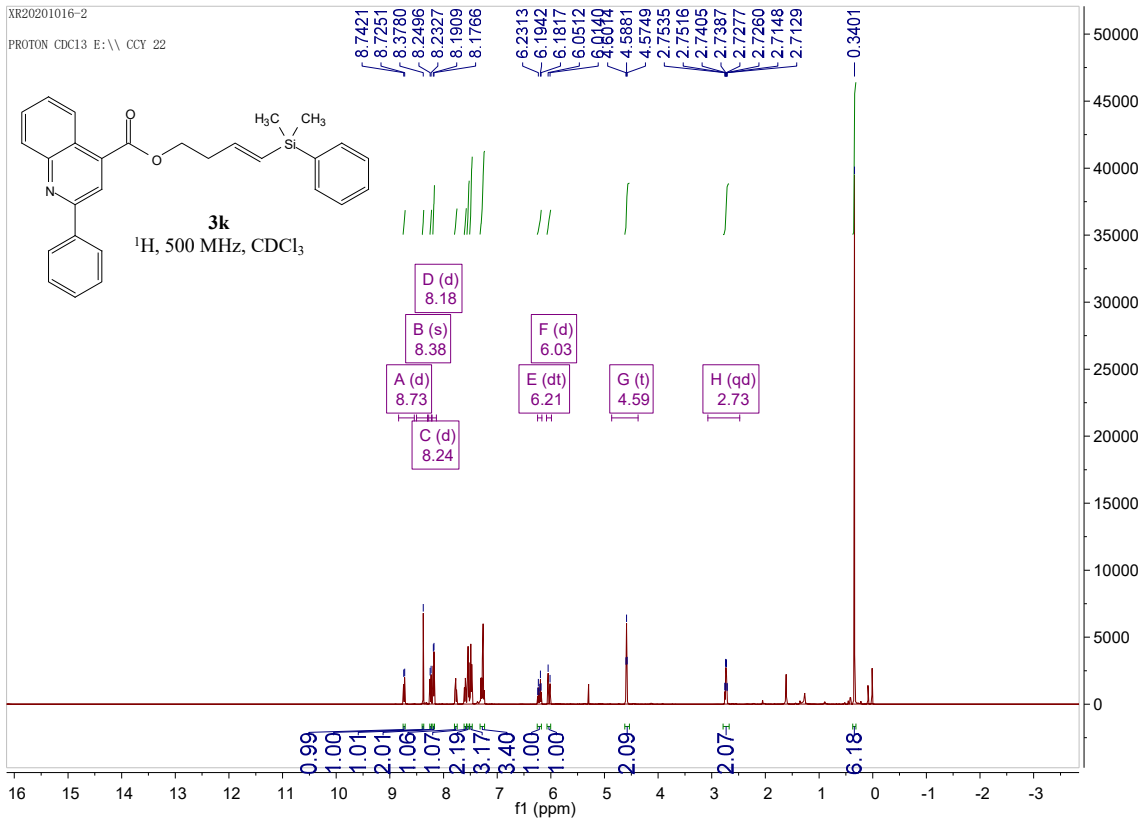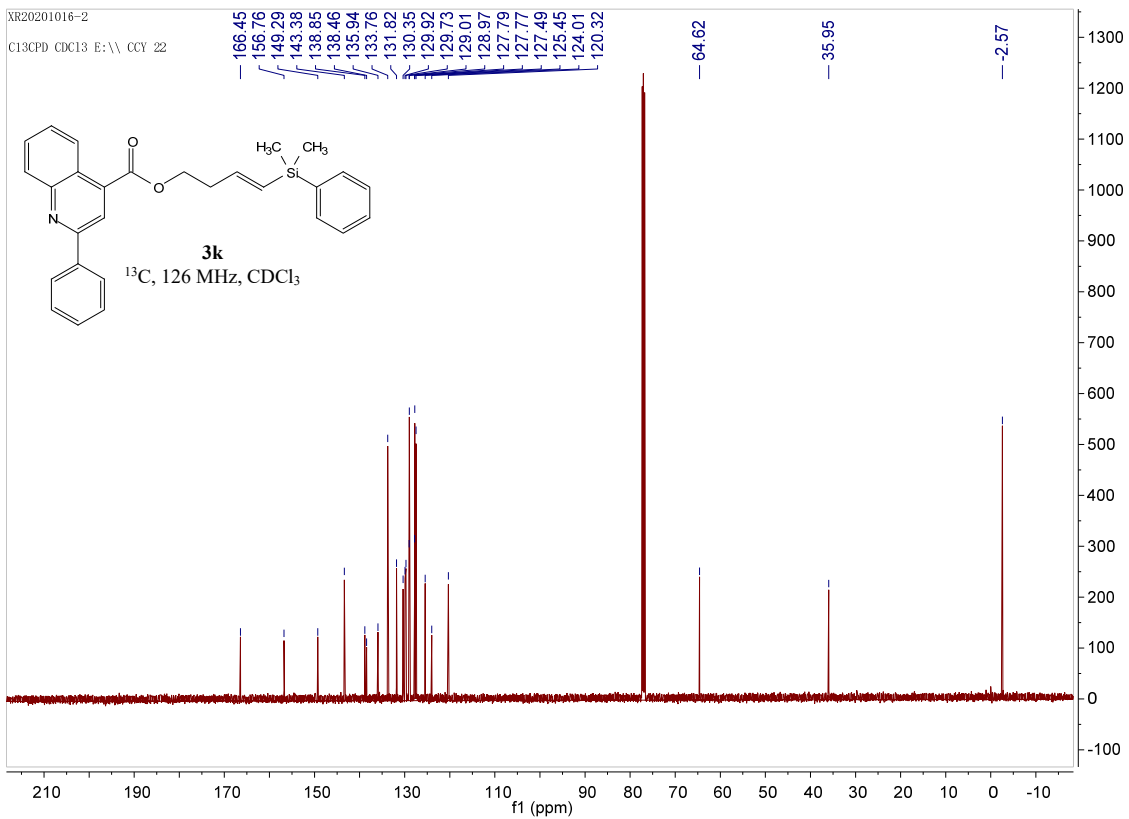

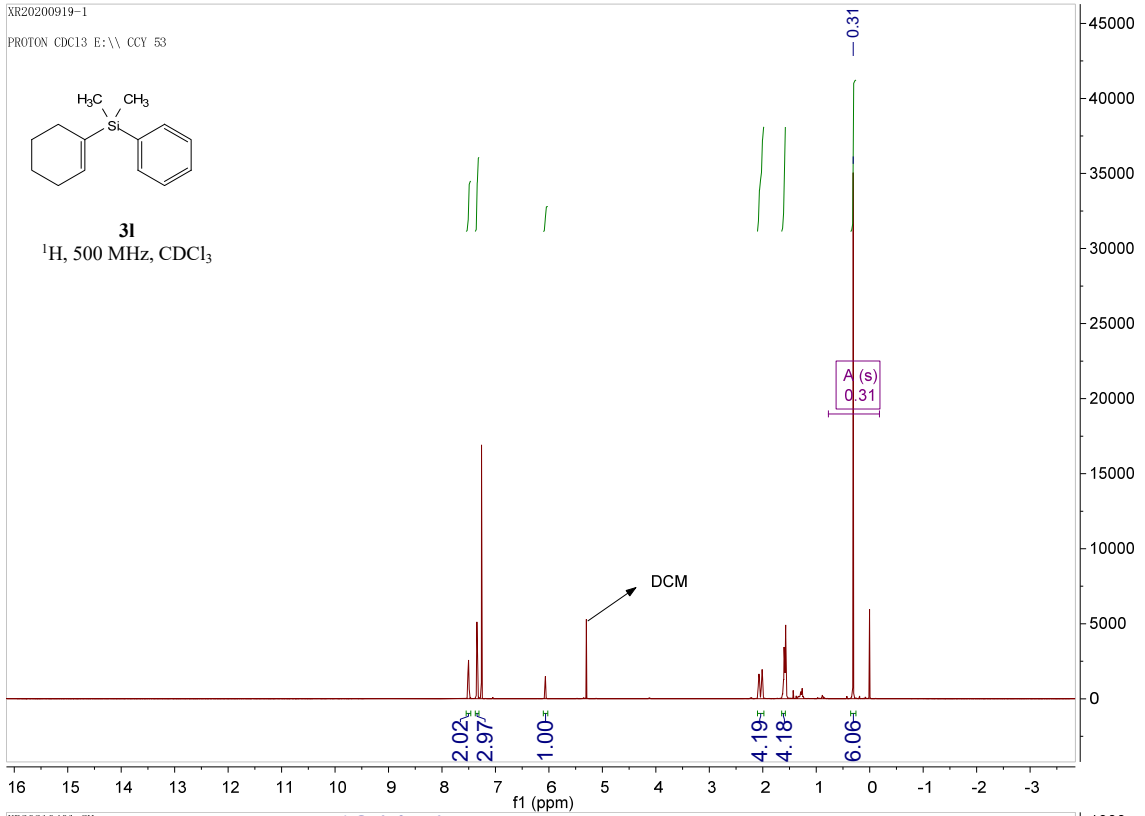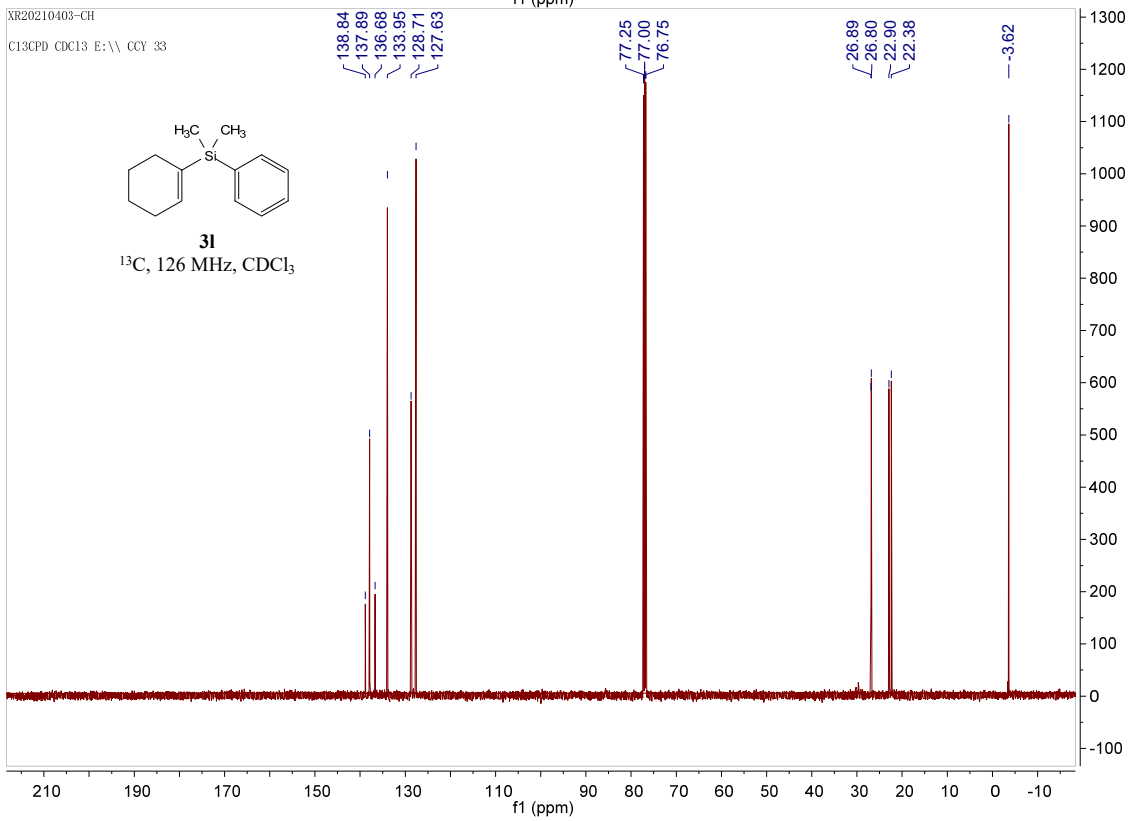

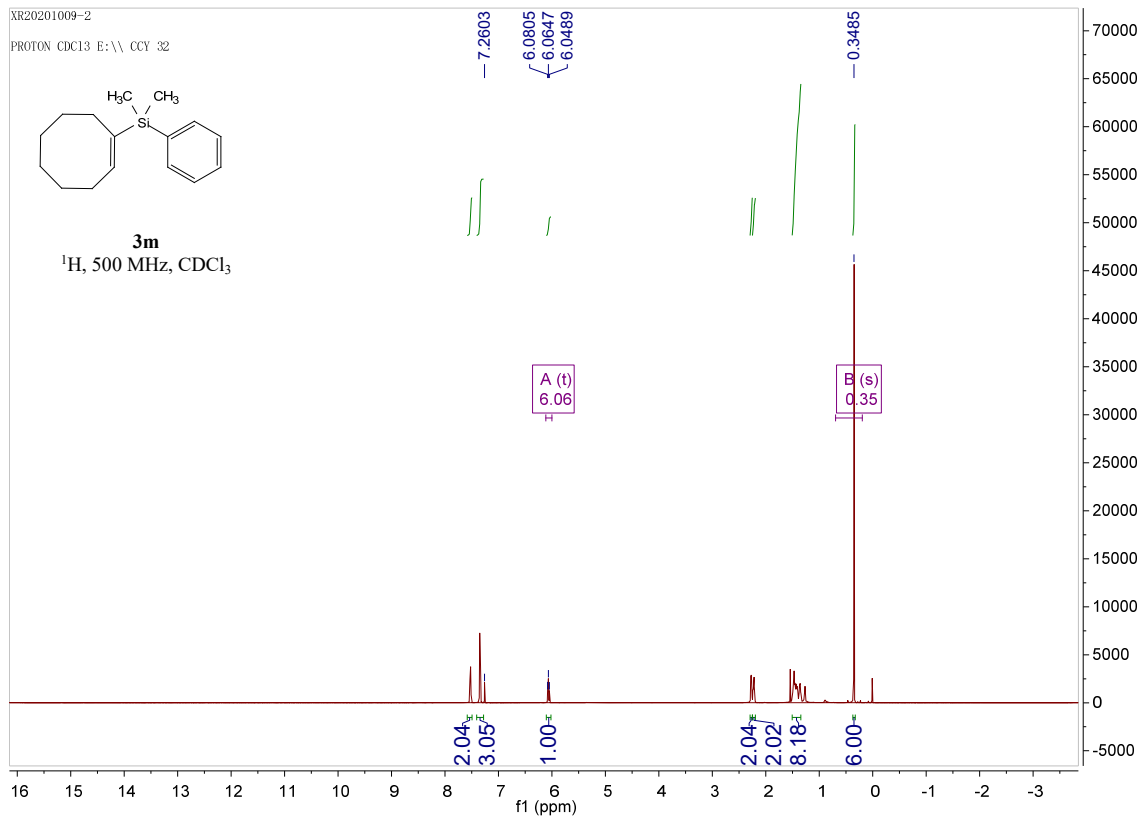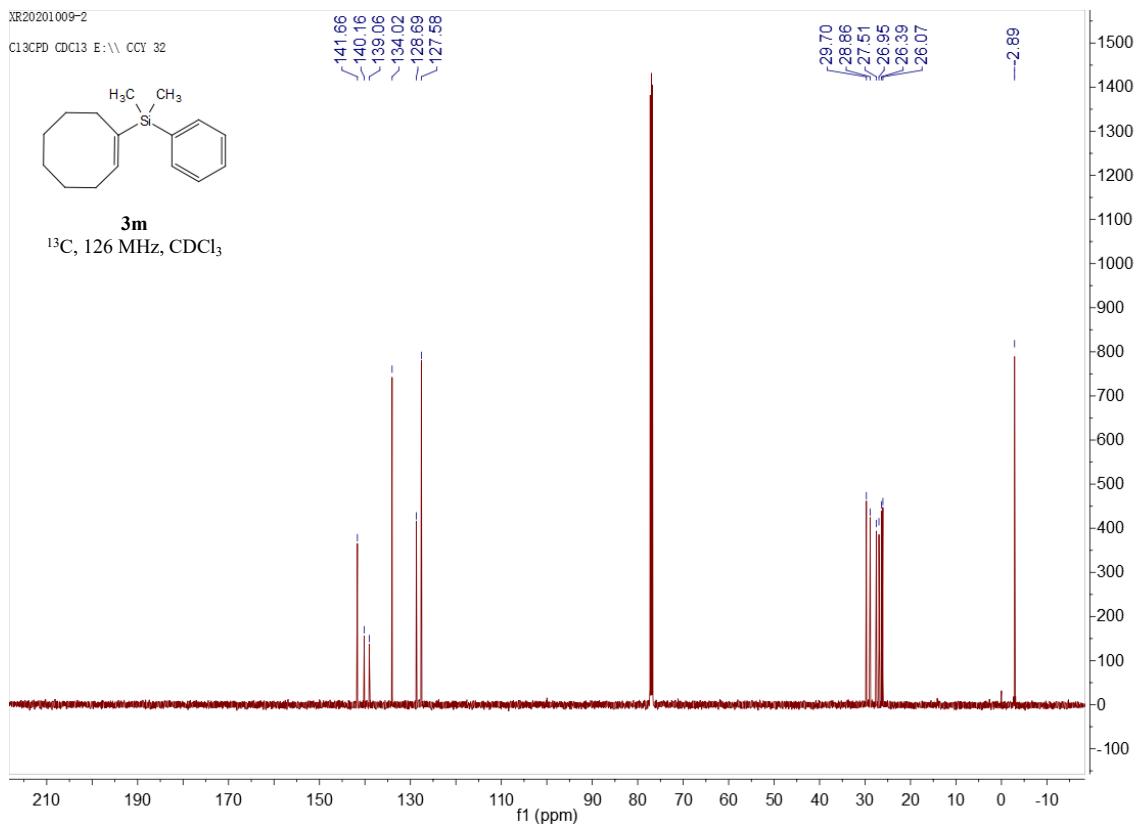

XR20201204-3

PROTON CDC13 E:\ \ CY 53

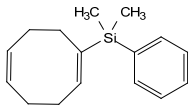

**3n**  
<sup>1</sup>H, 500 MHz, CDCl<sub>3</sub>

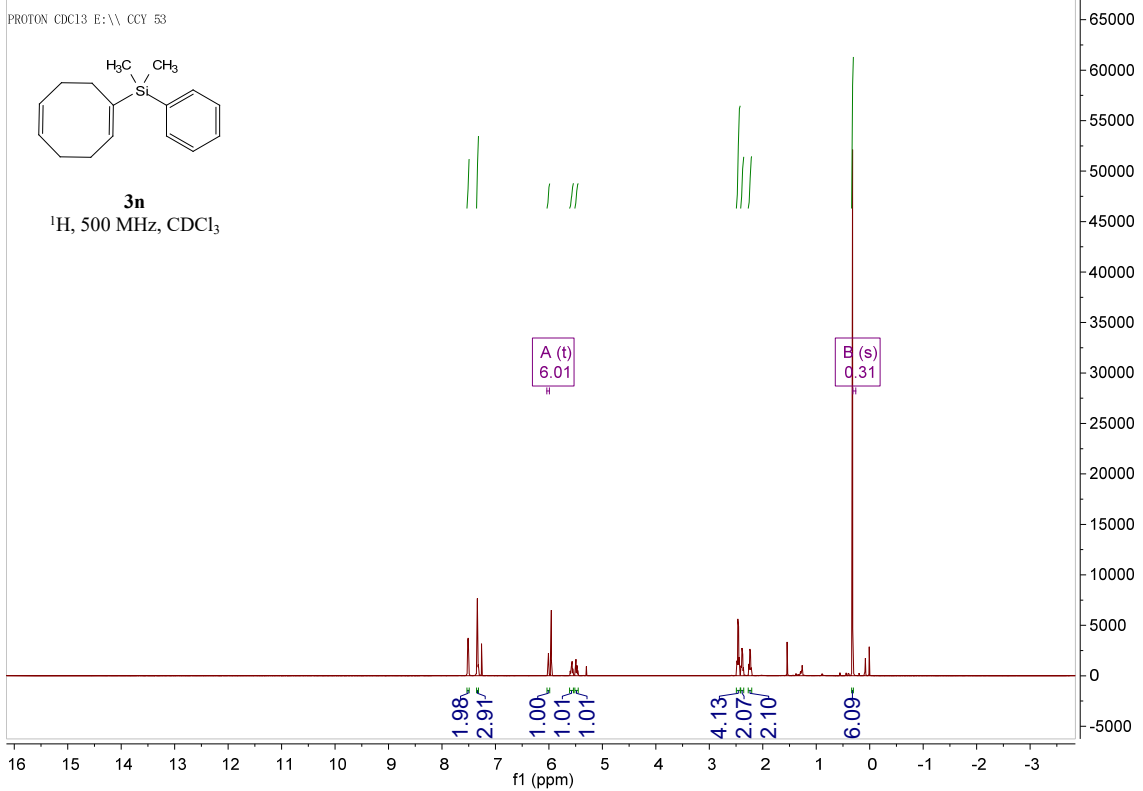

XR20201204-3

C13CPD CDC13 E:\ \ CY 53

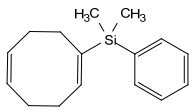

**3n**  
<sup>13</sup>C, 126 MHz, CDCl<sub>3</sub>

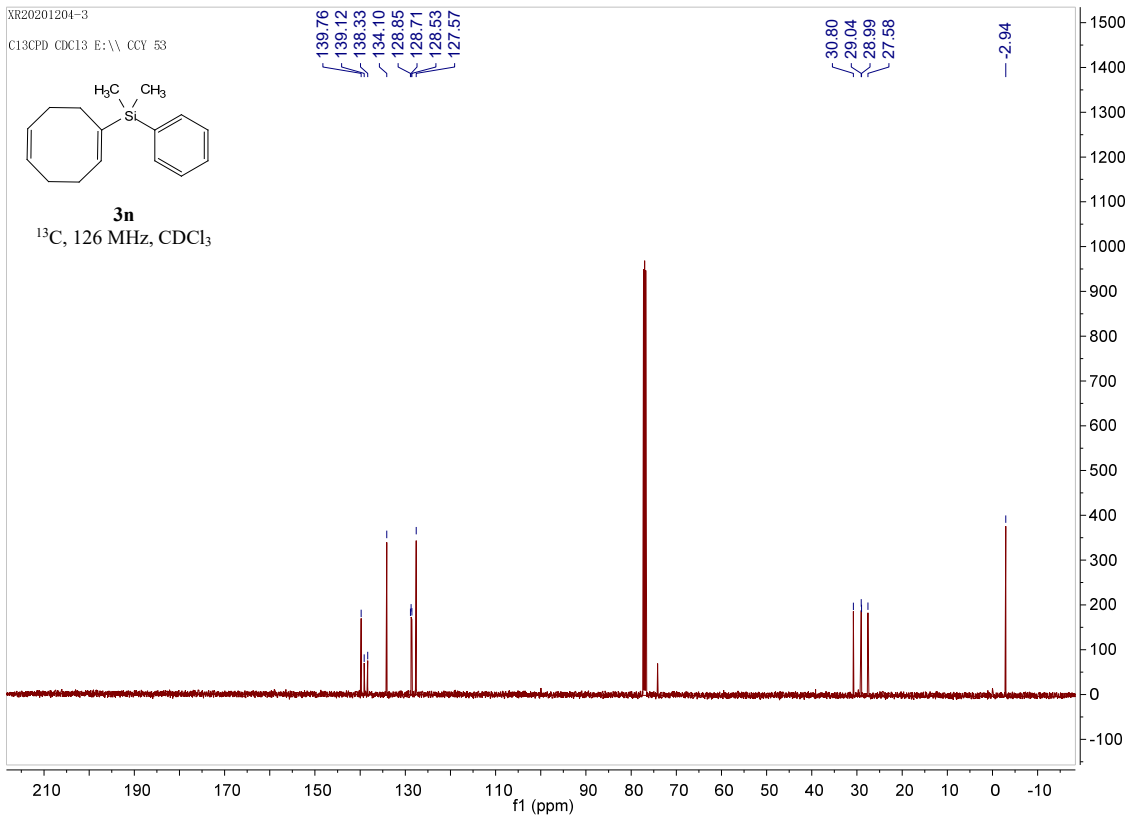

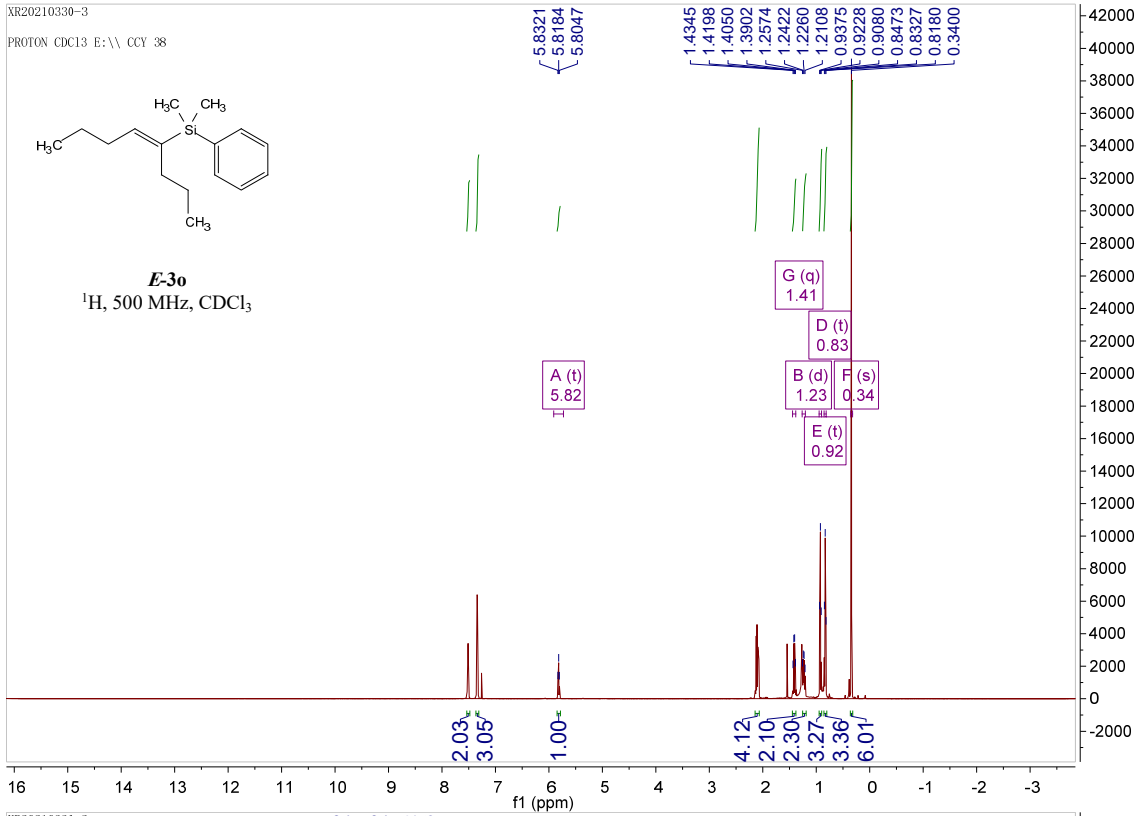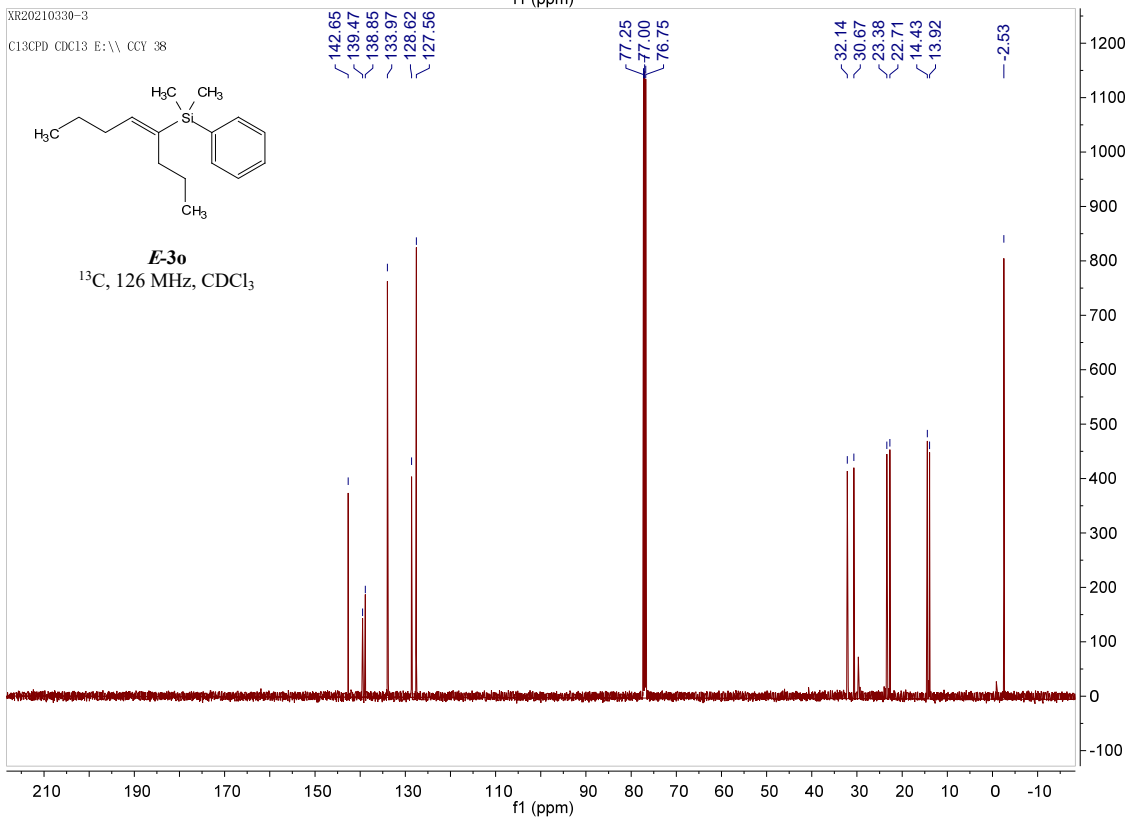



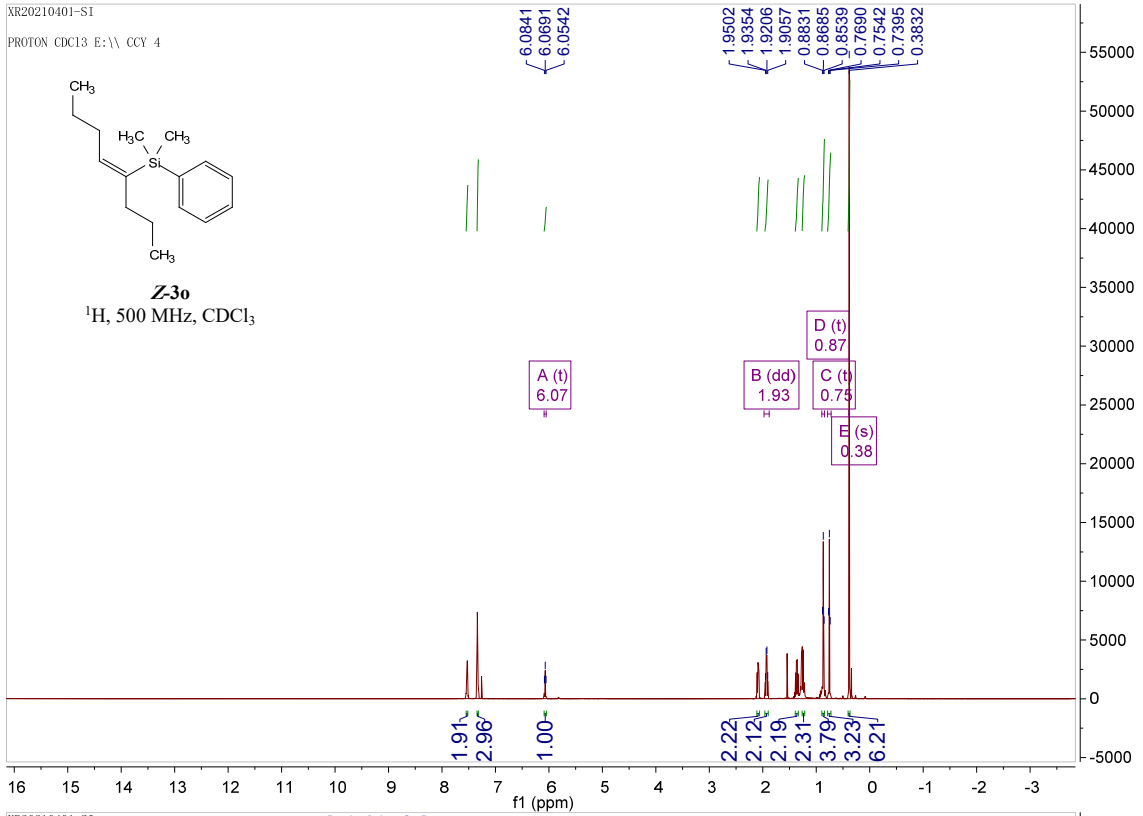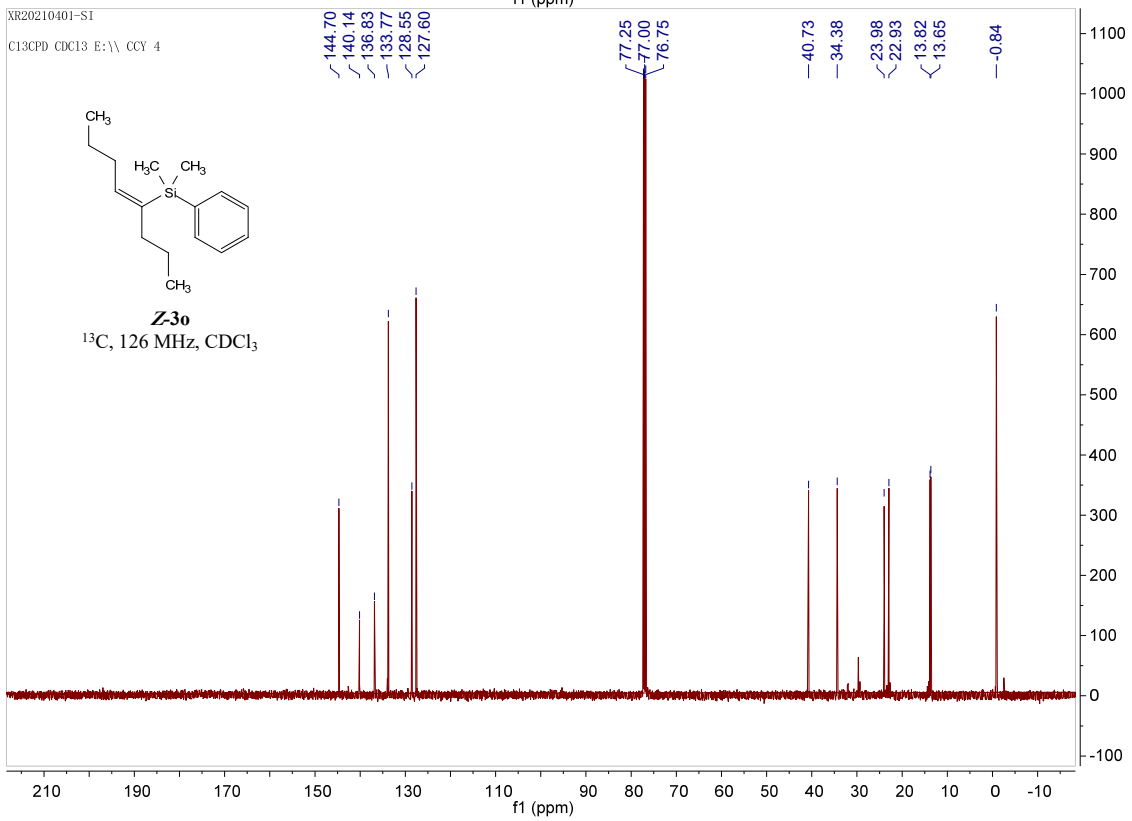

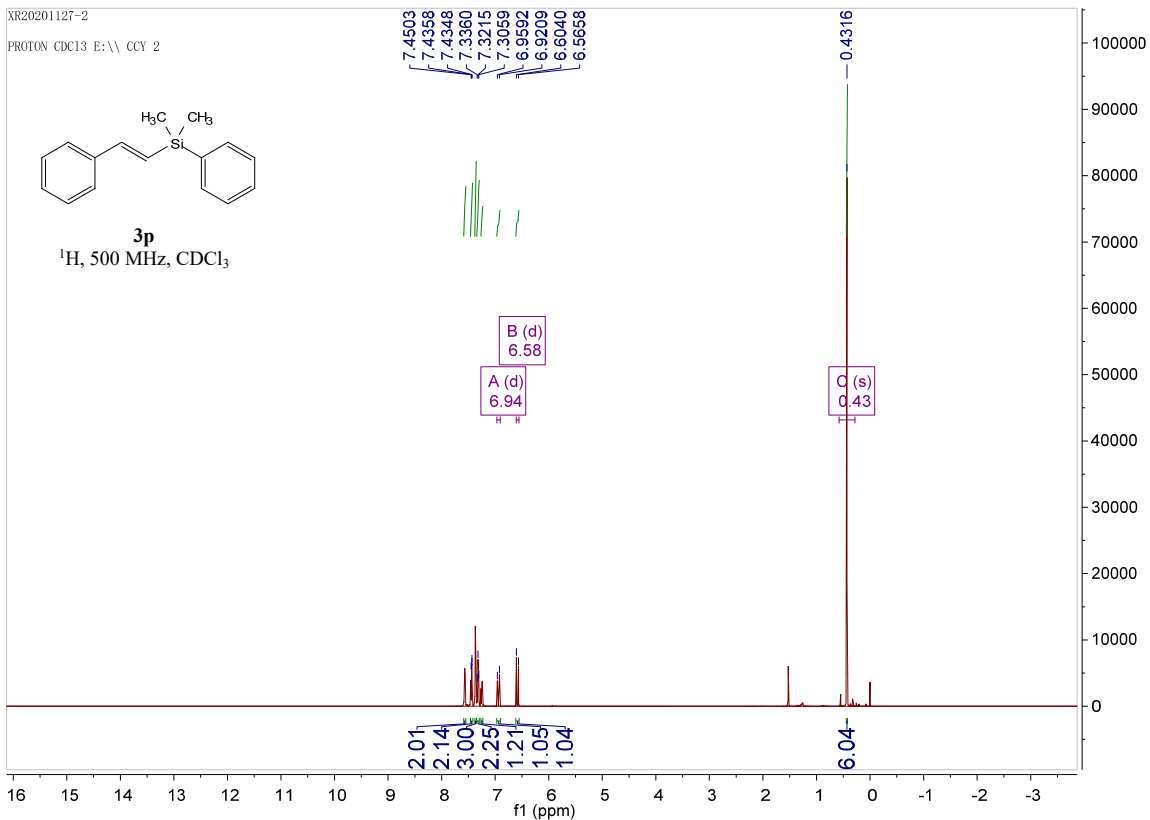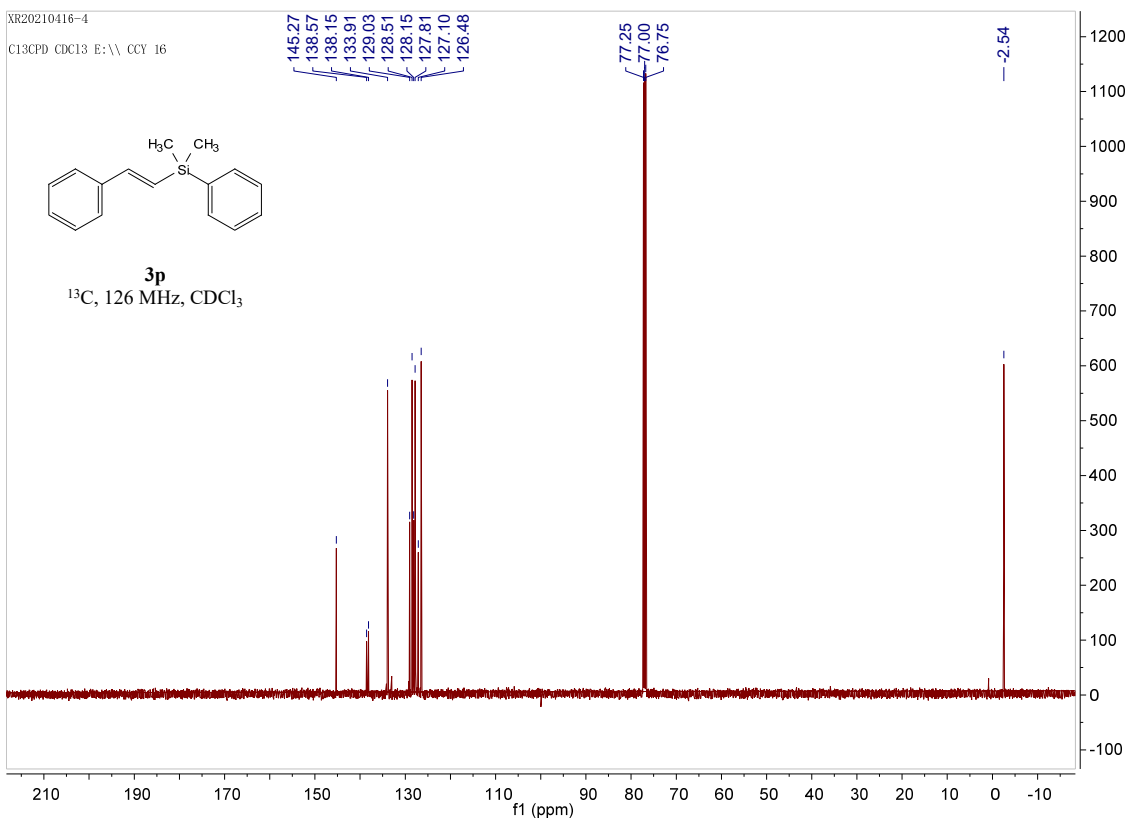

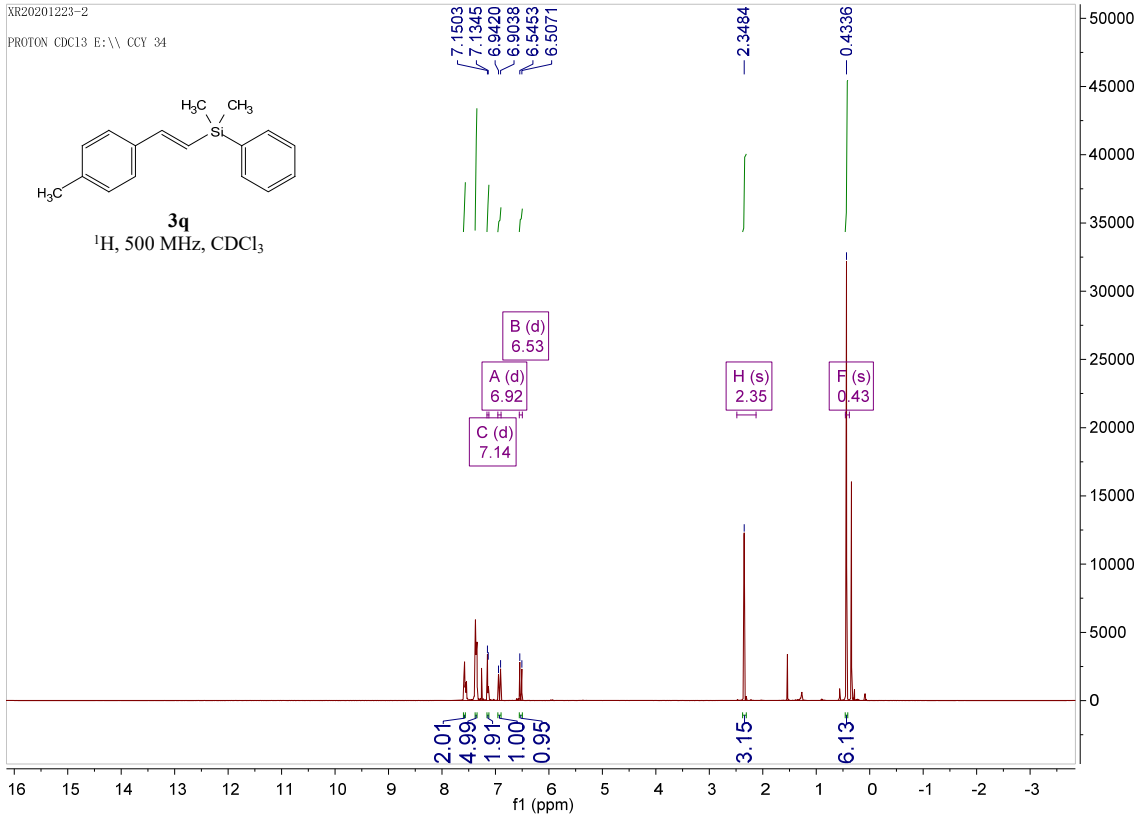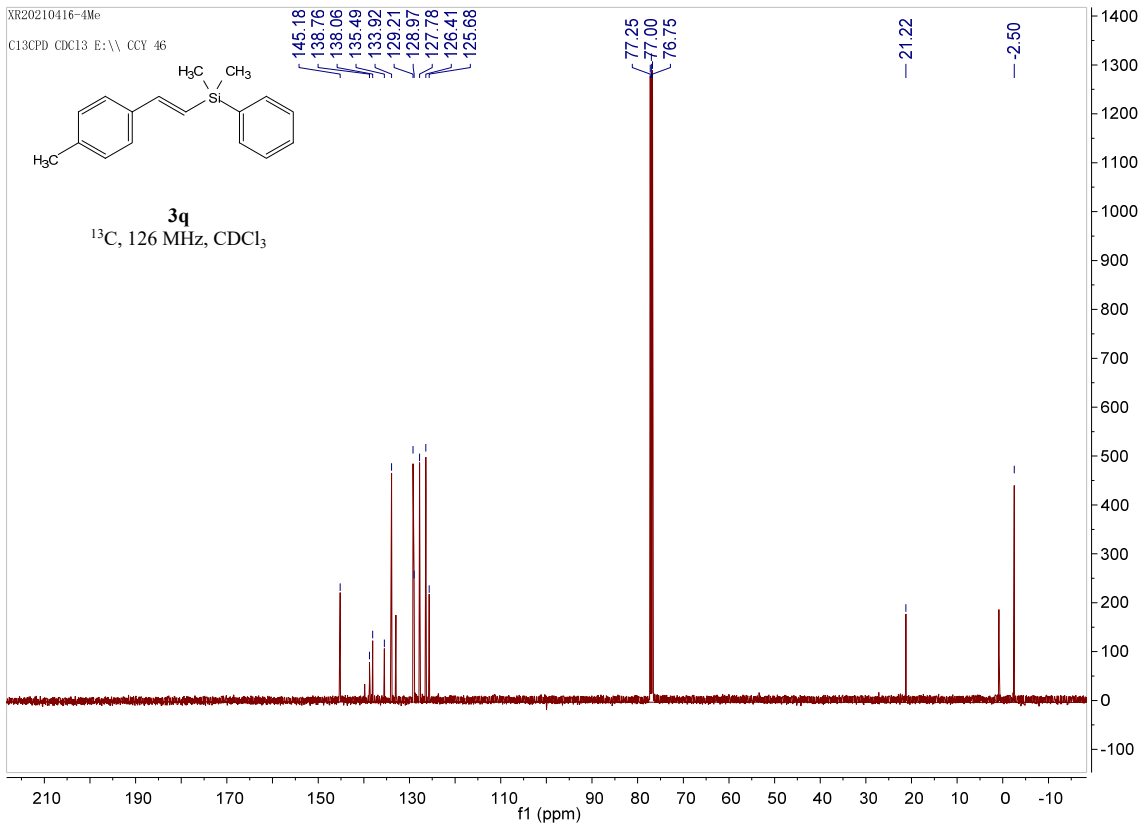

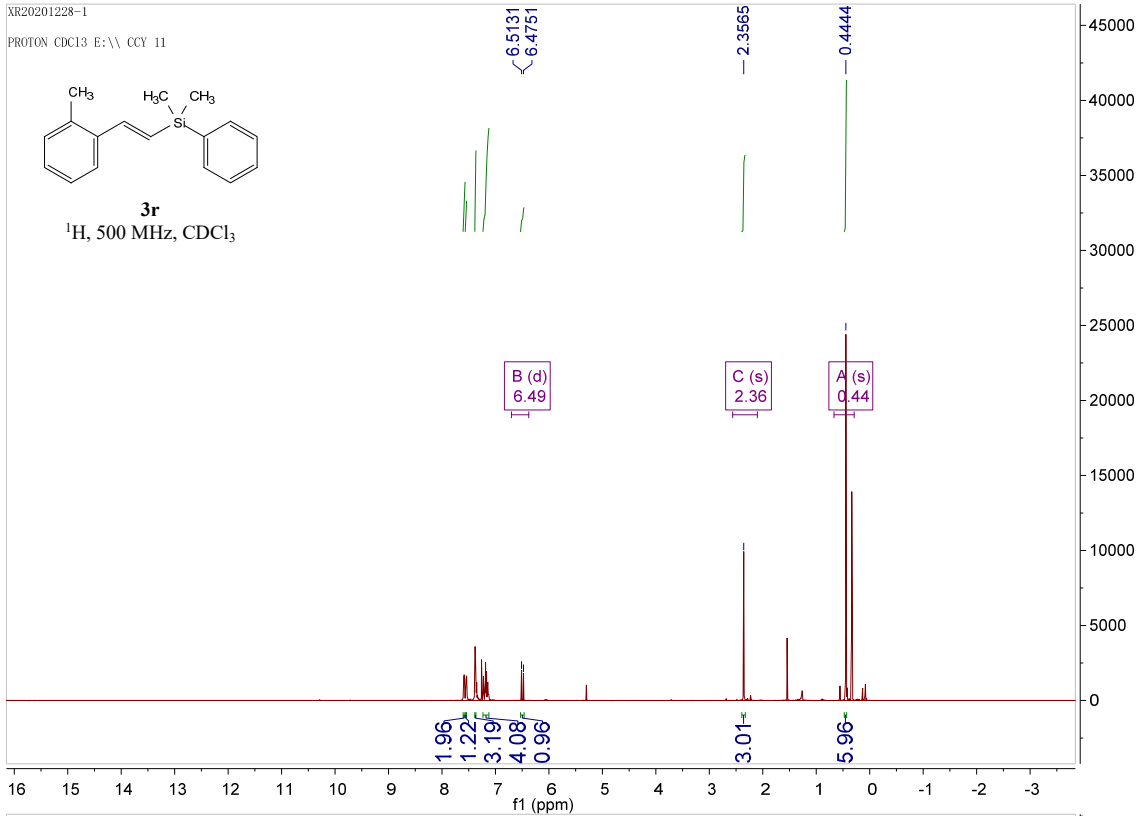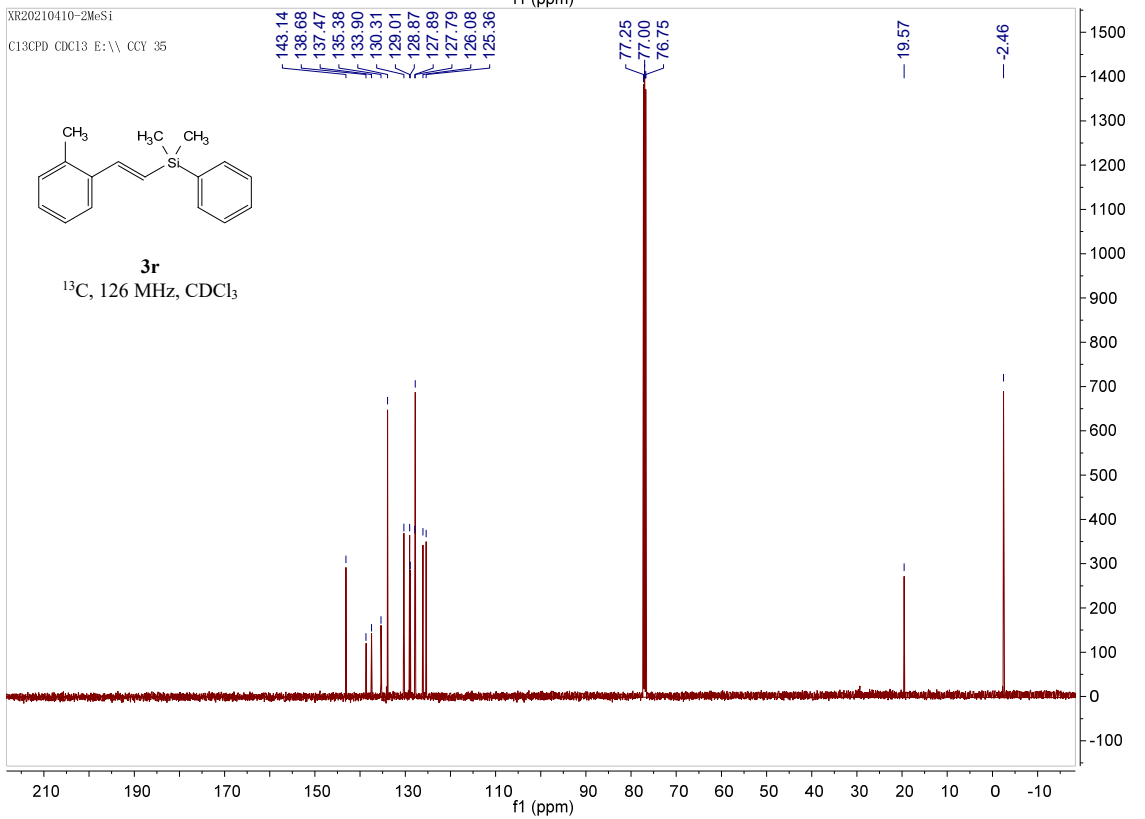

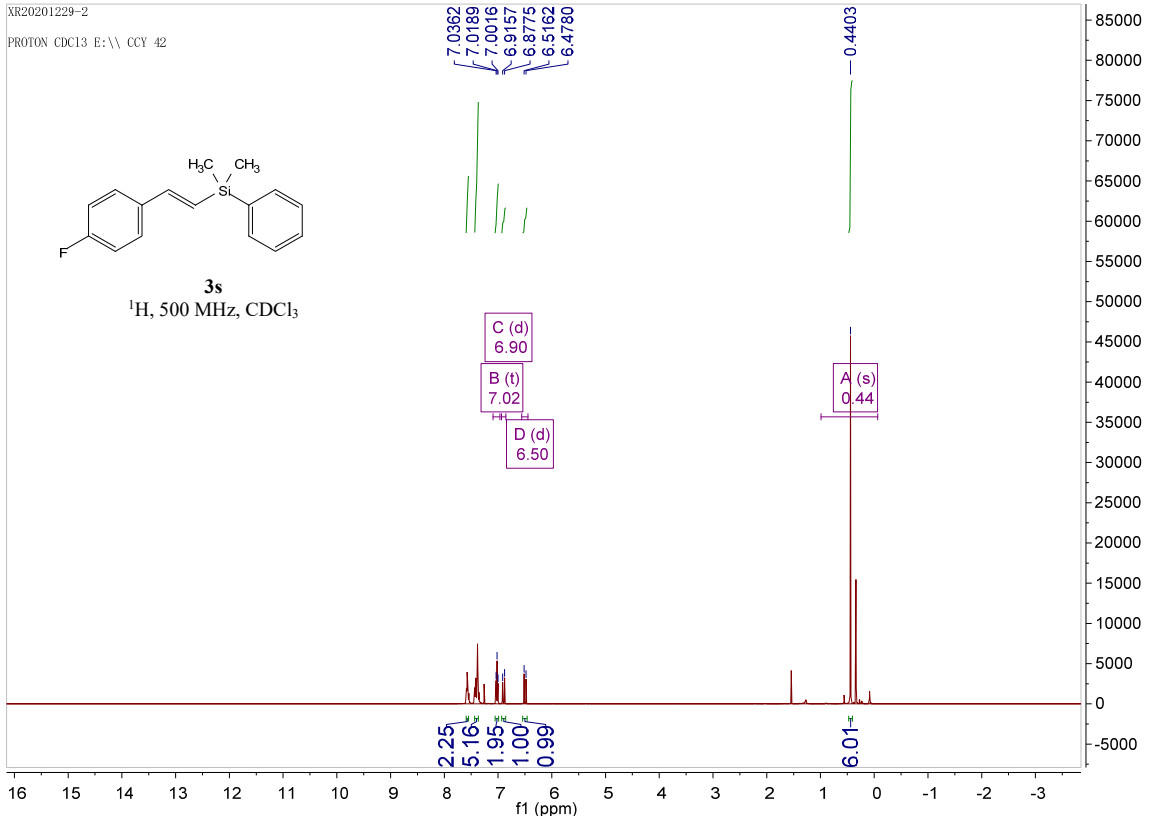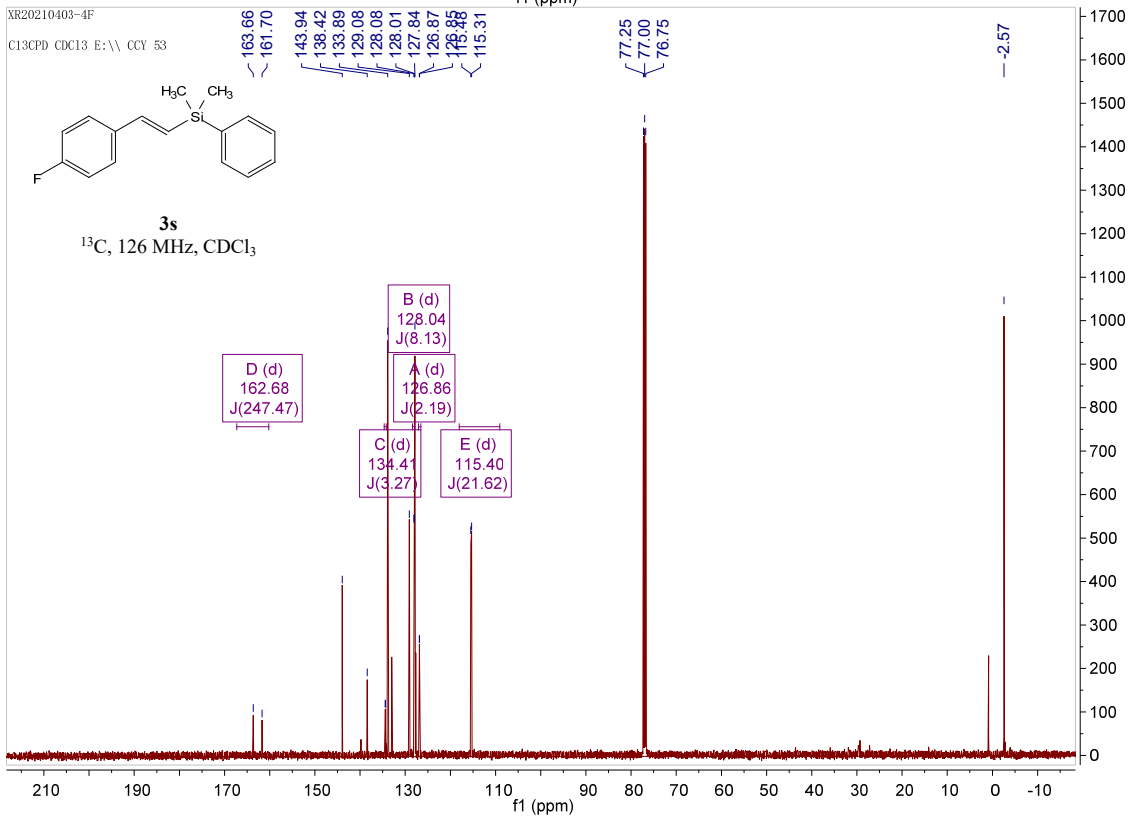

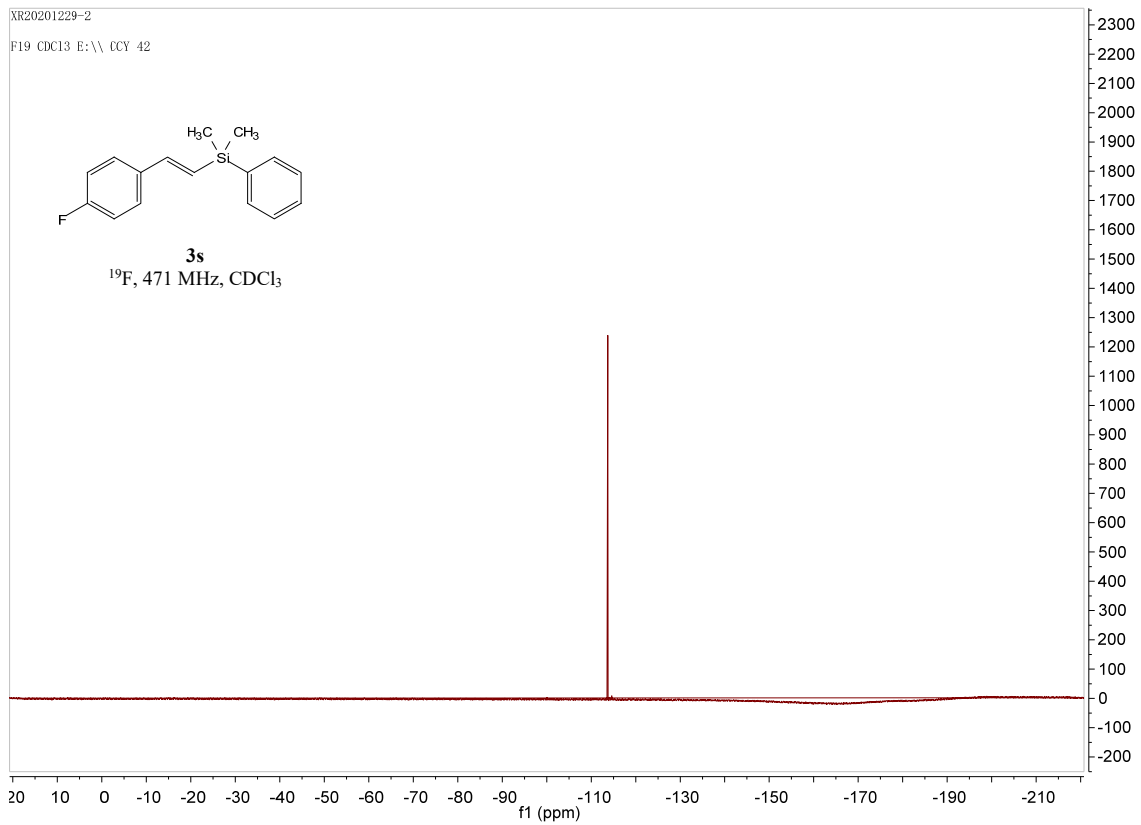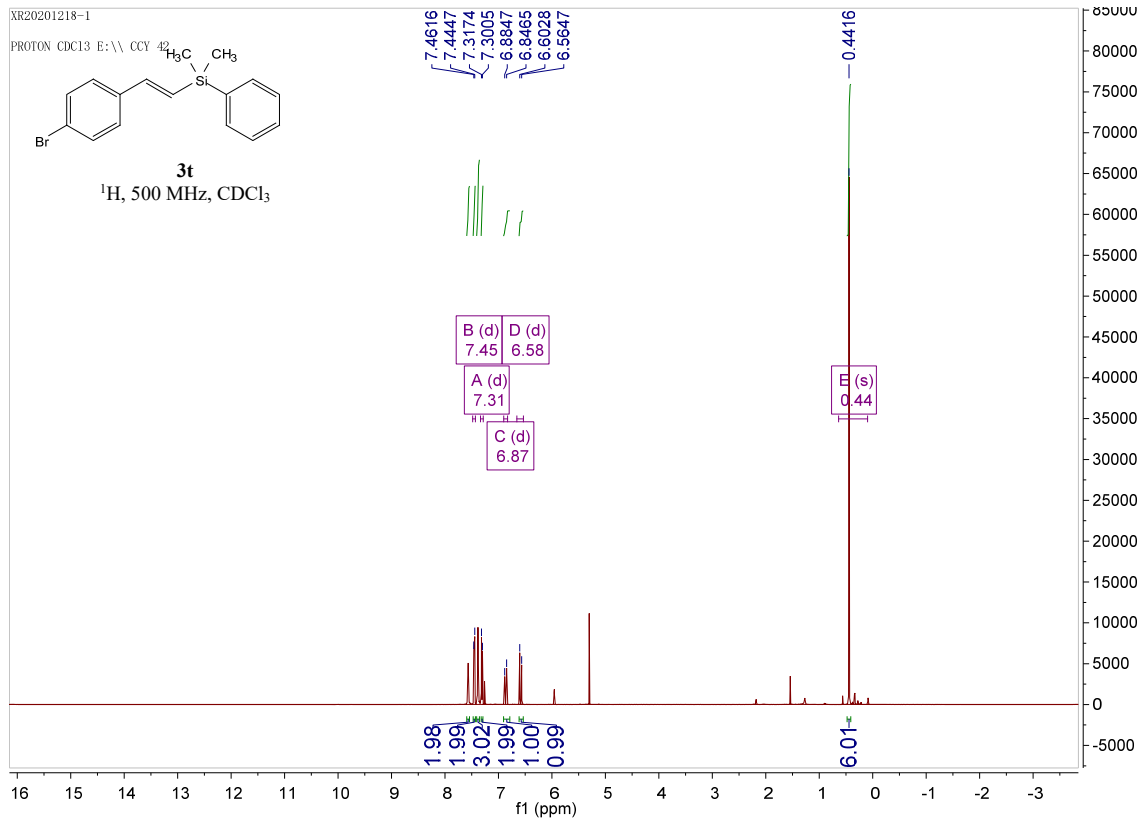

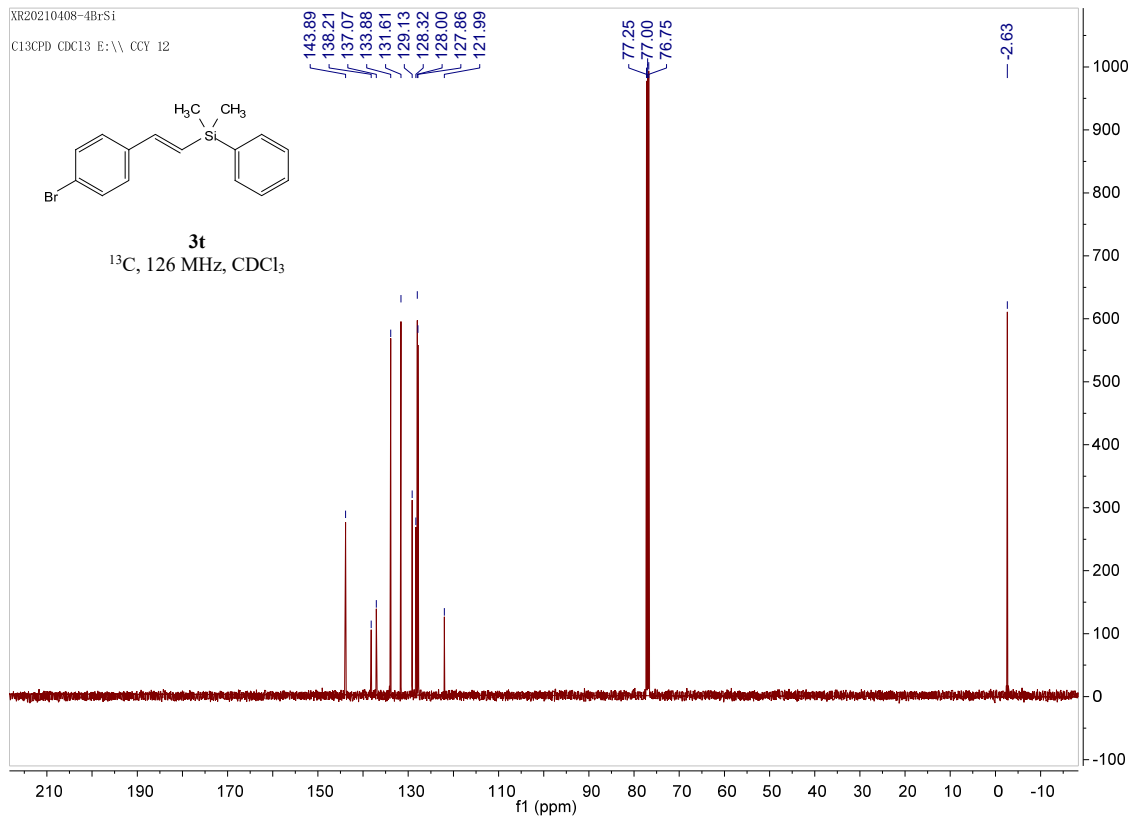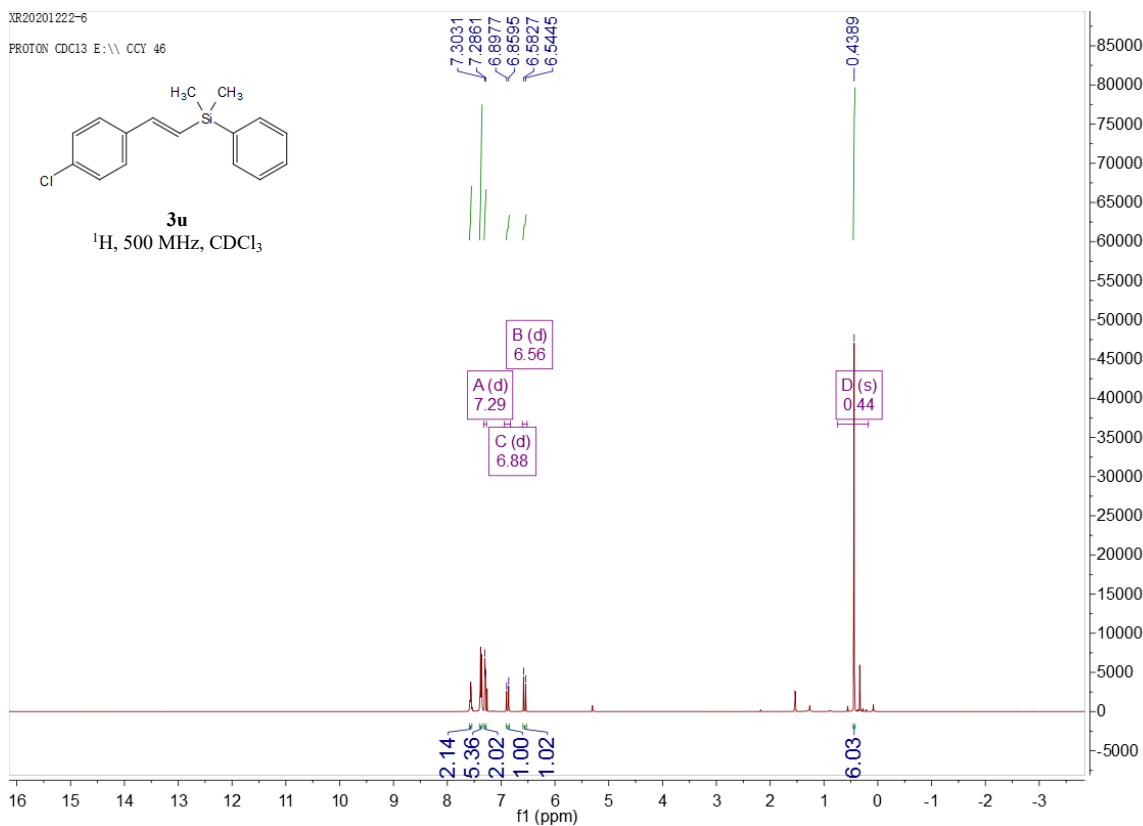

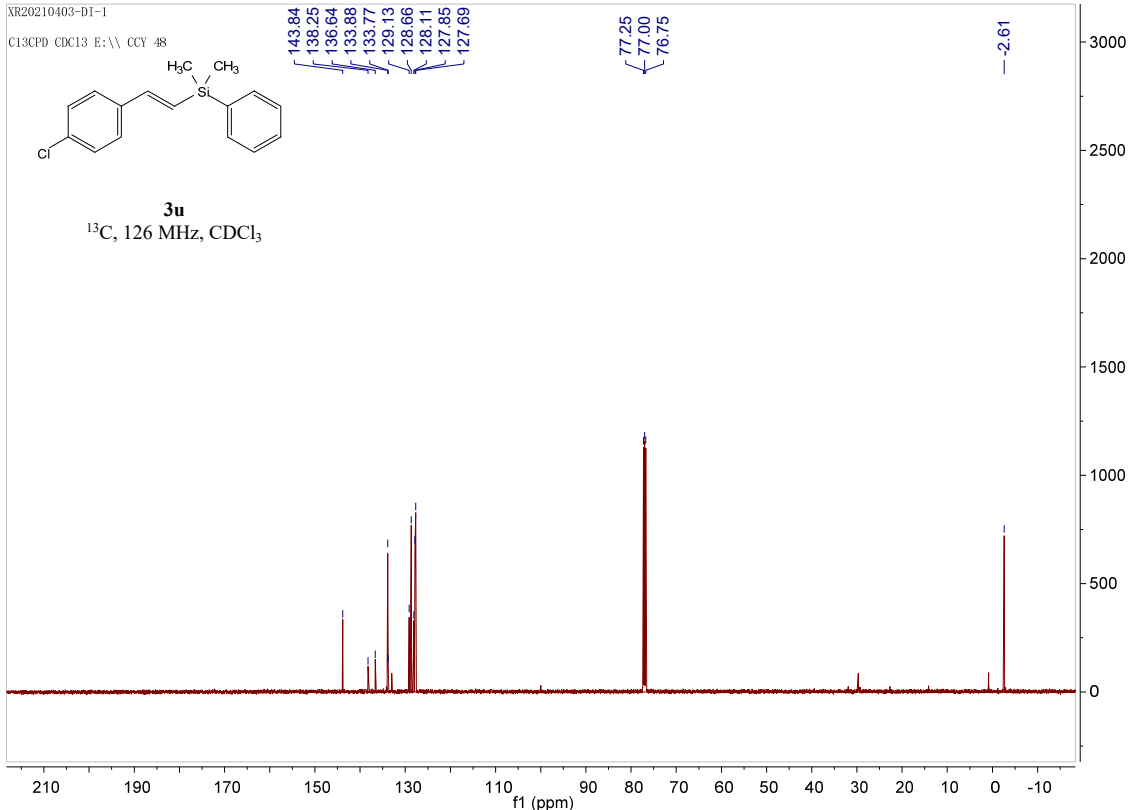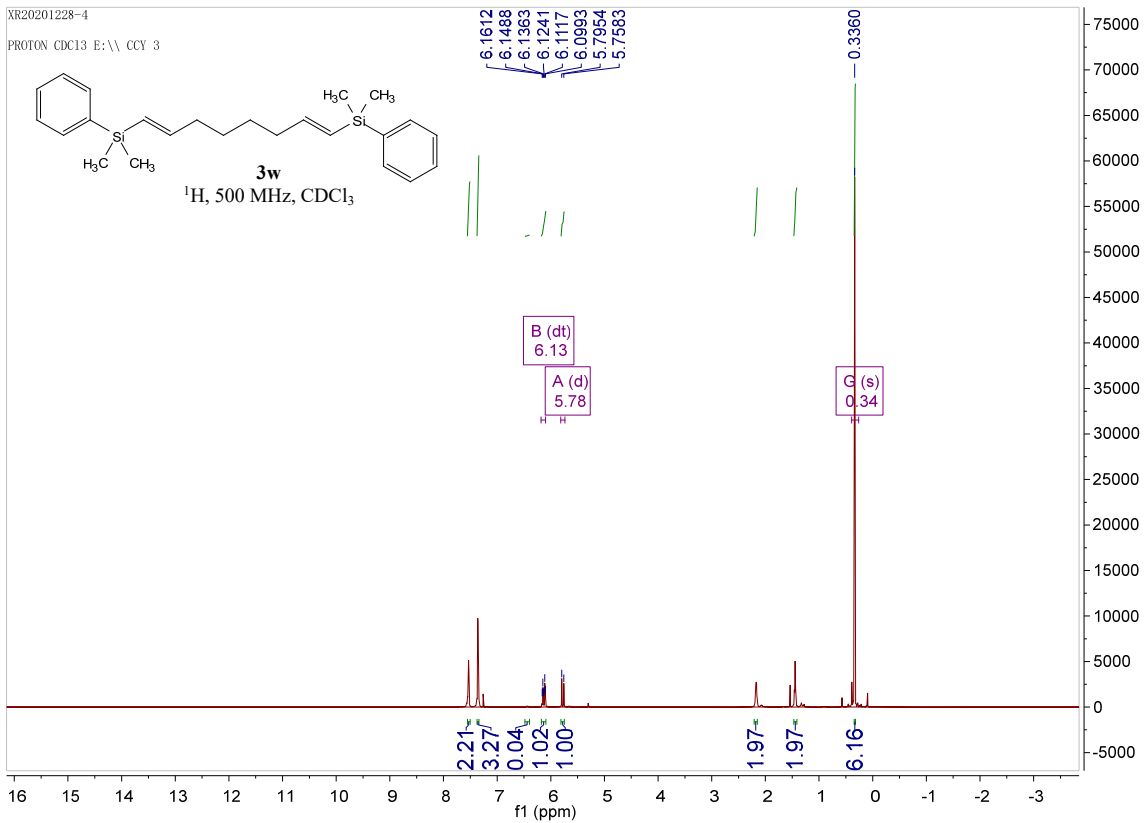



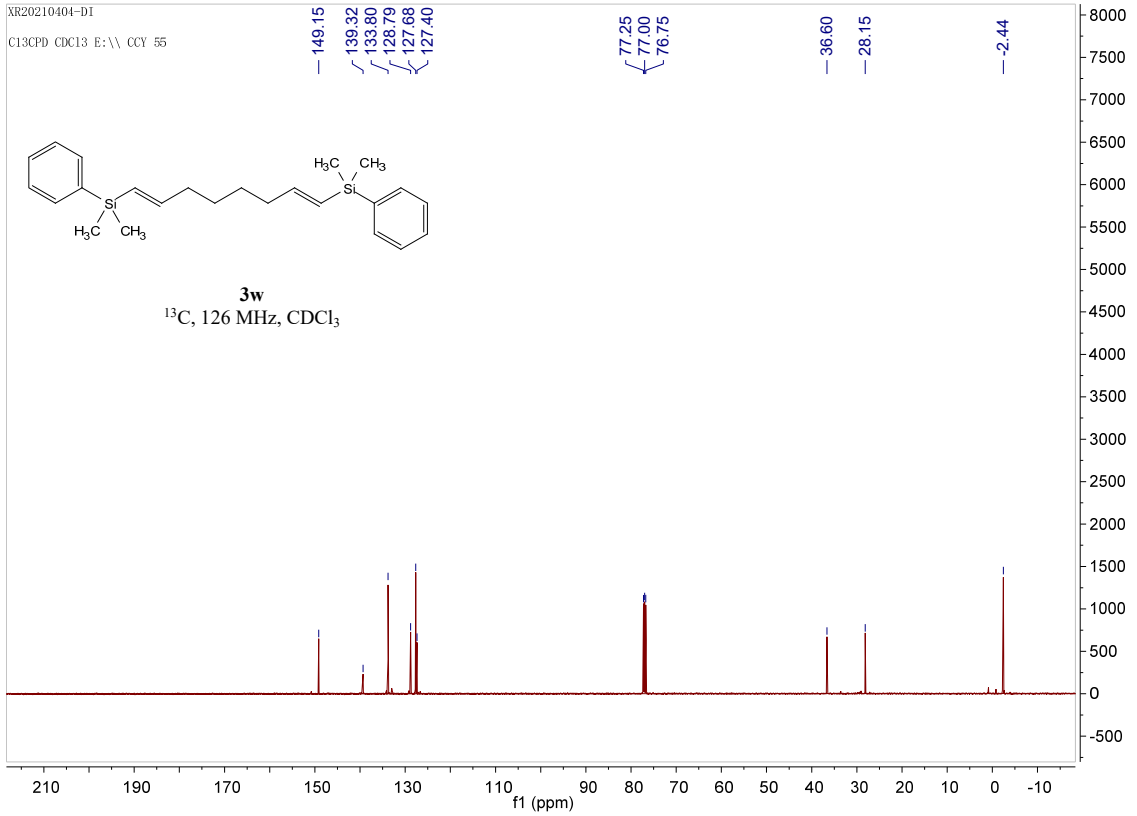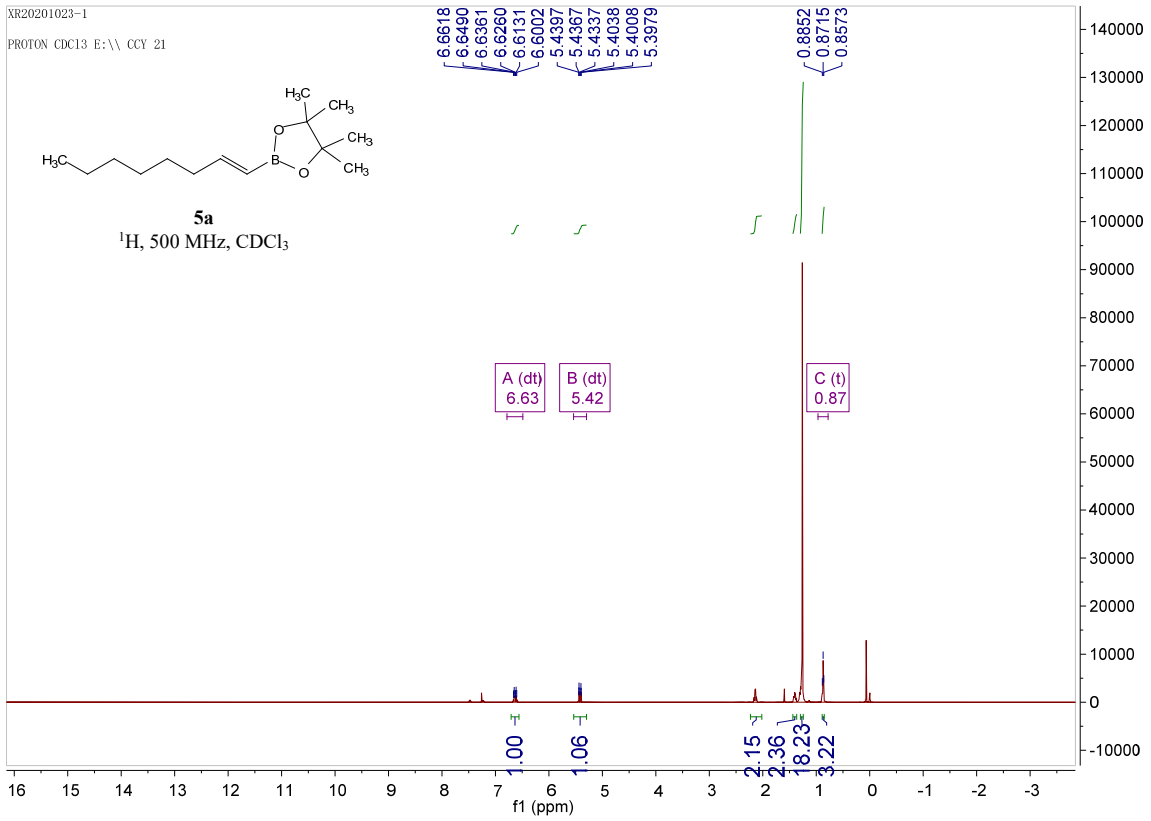

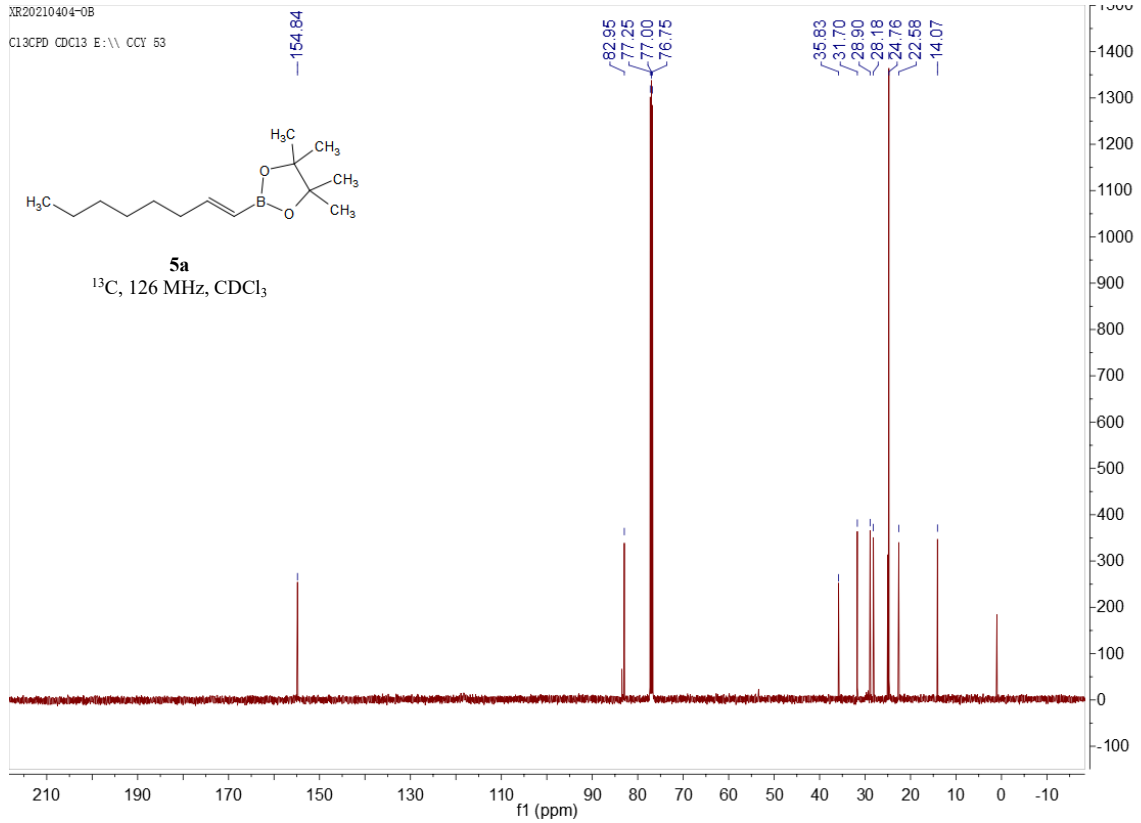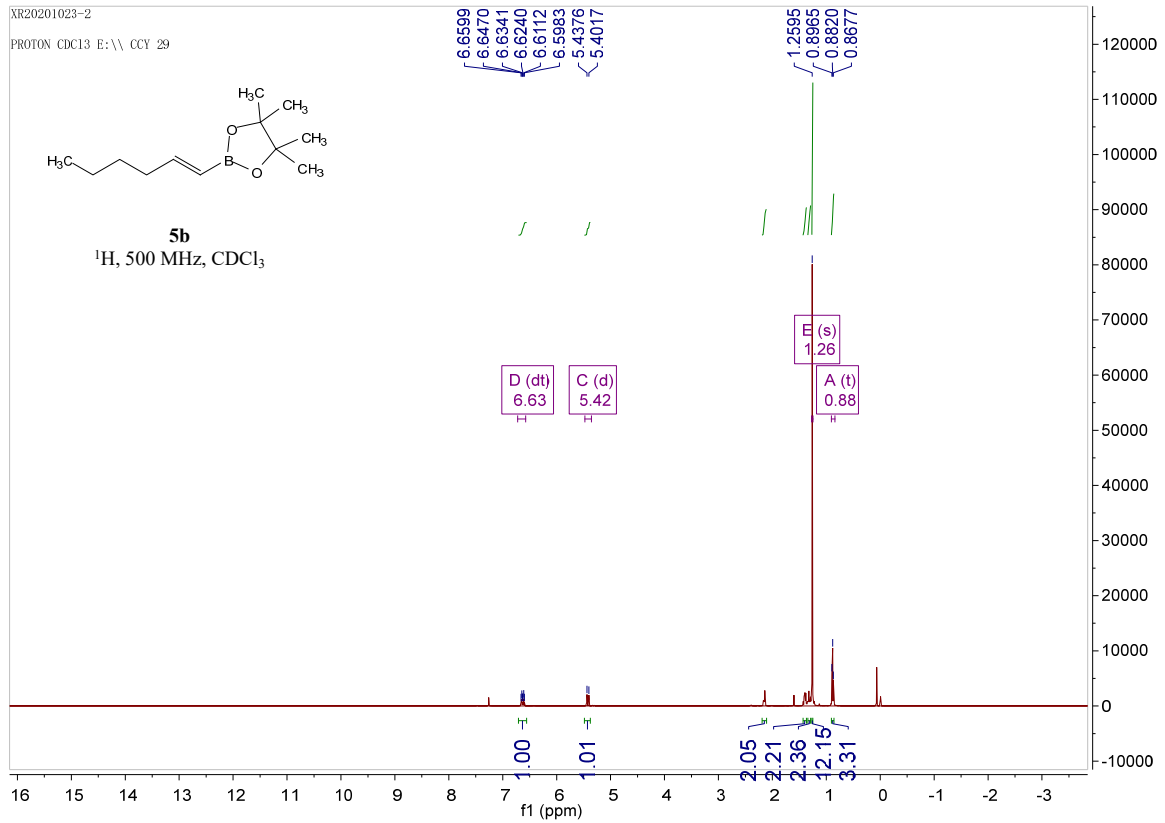

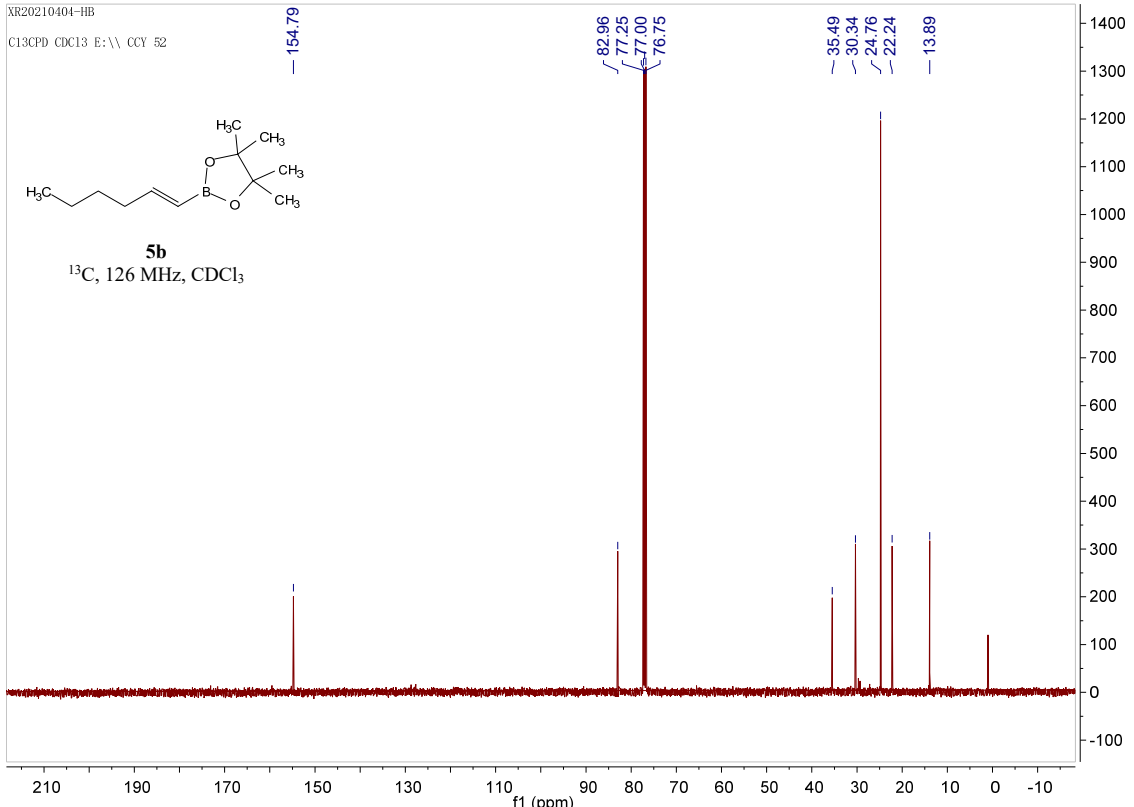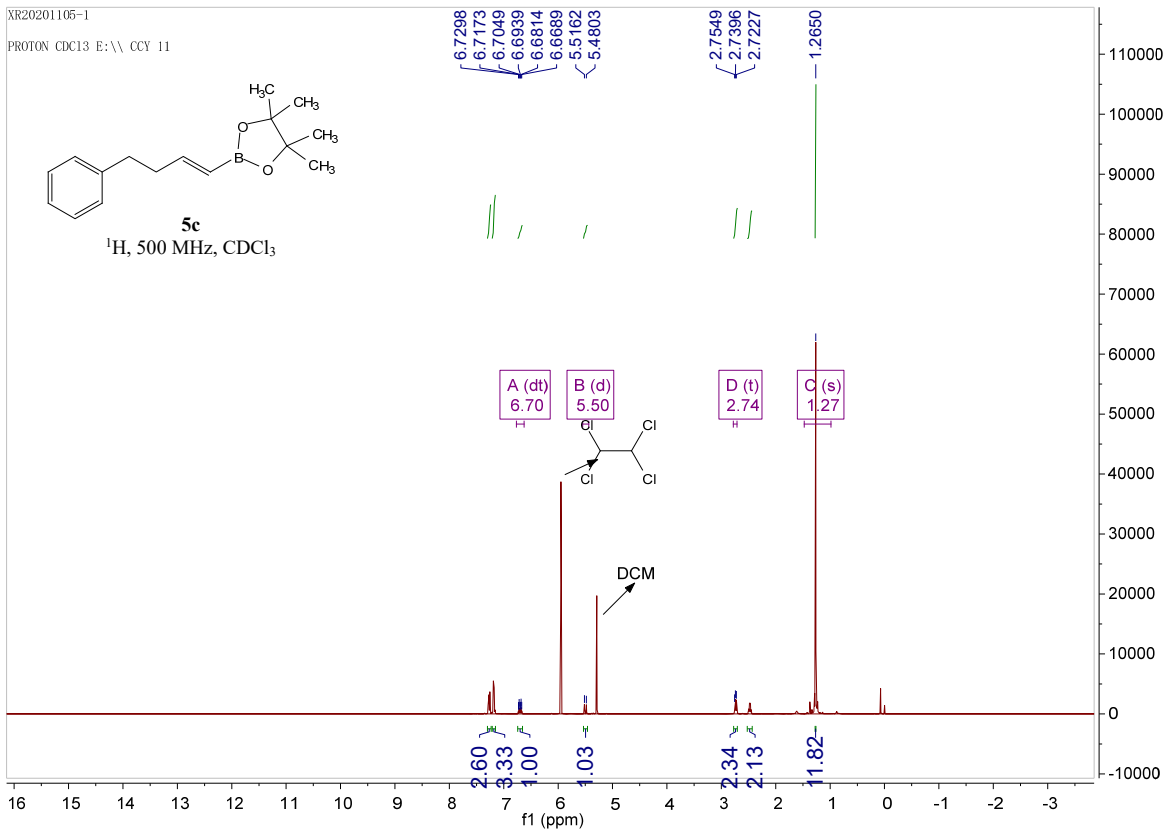

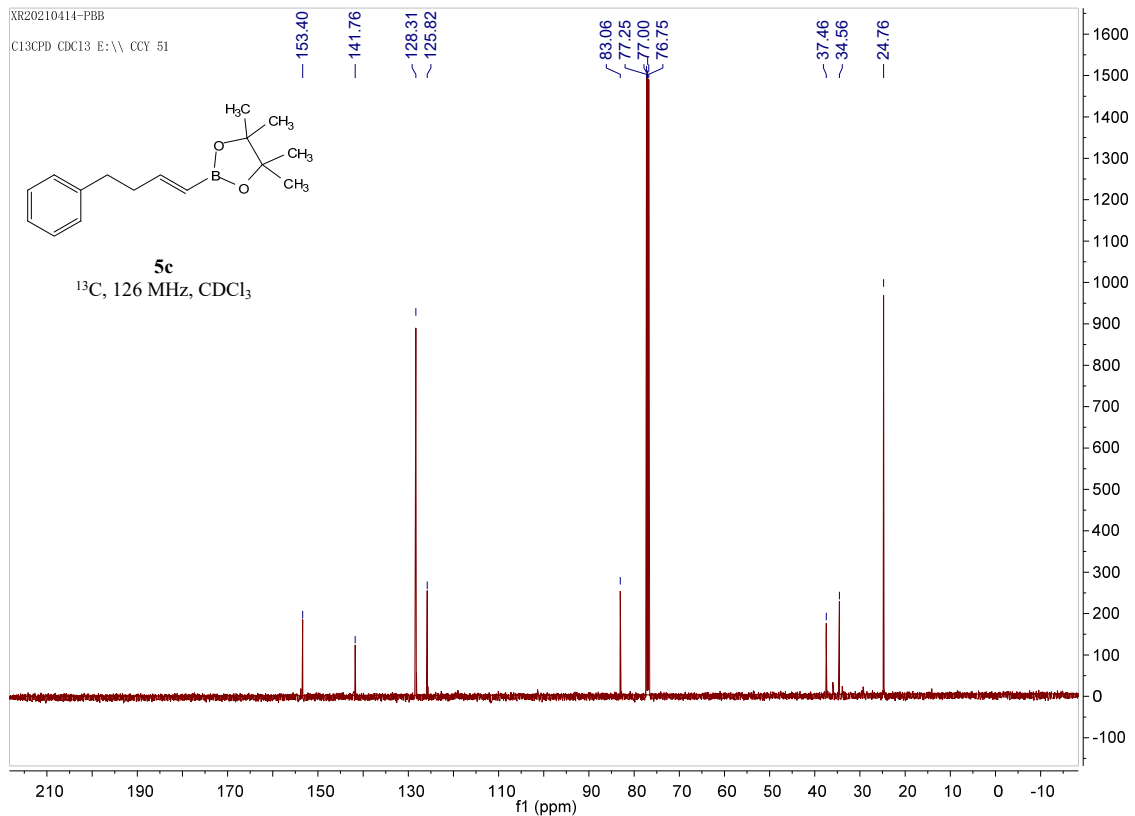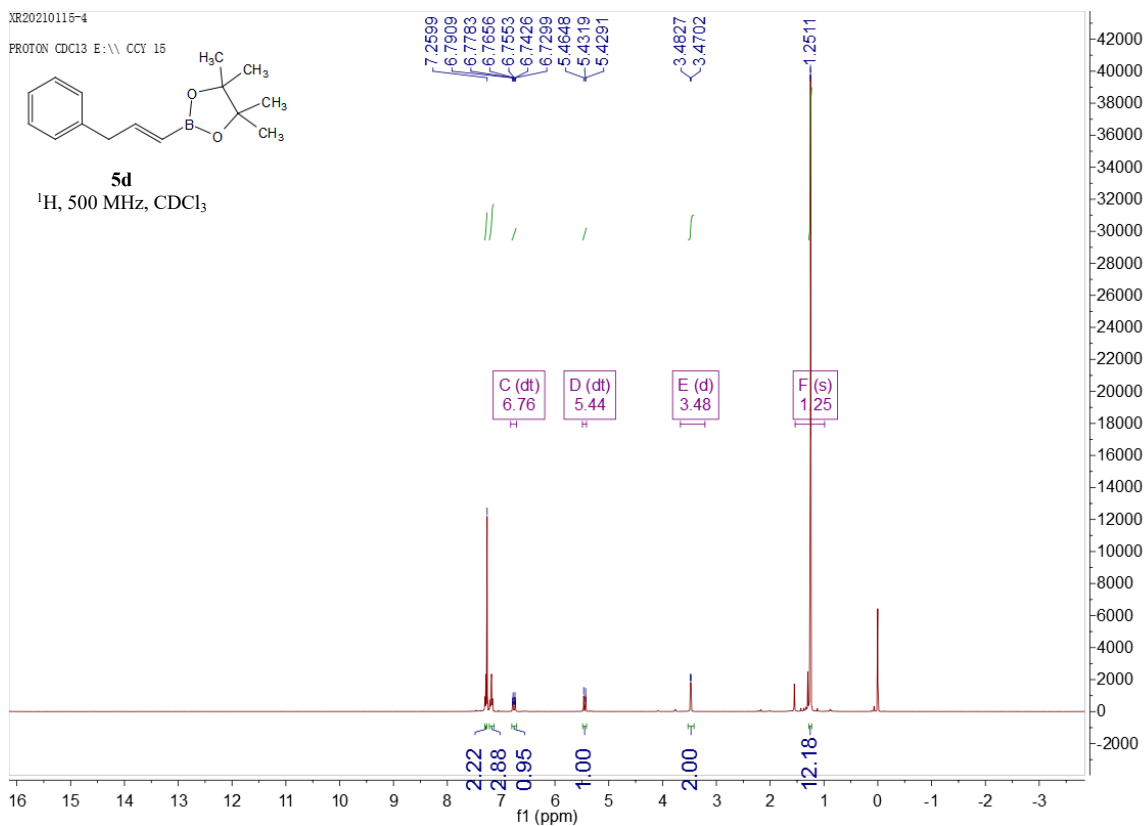

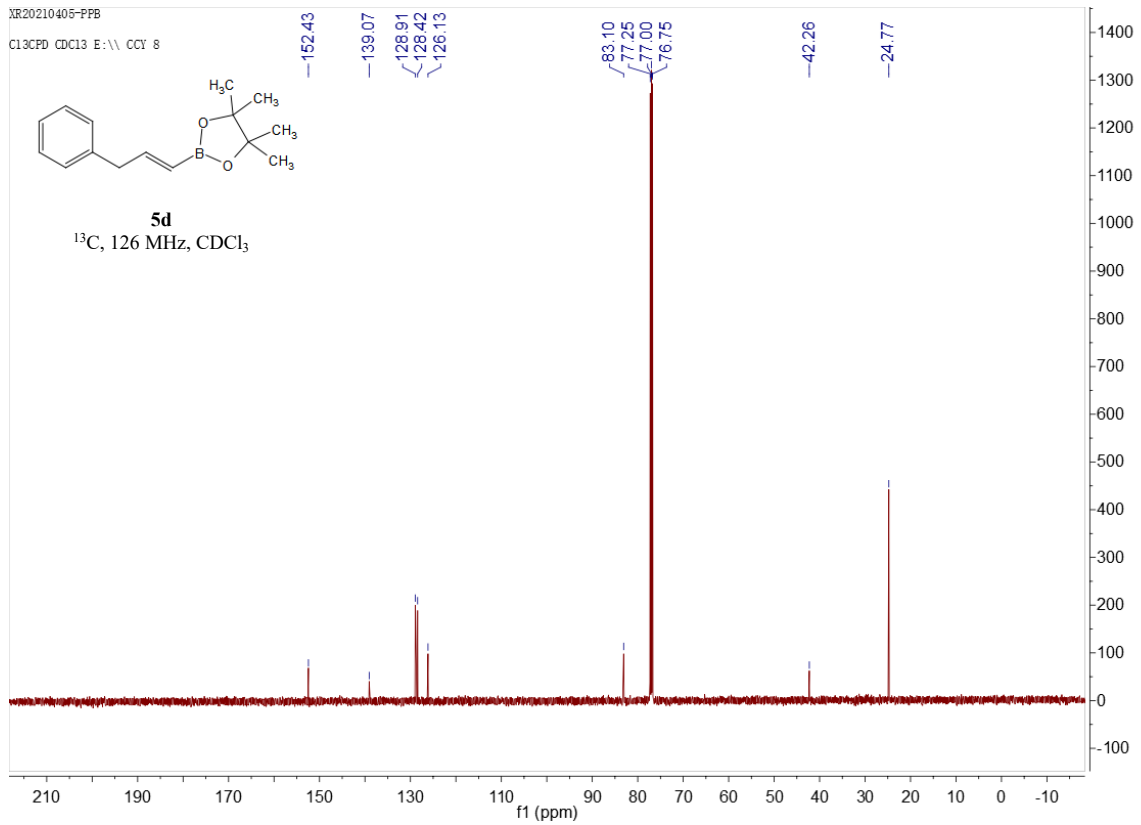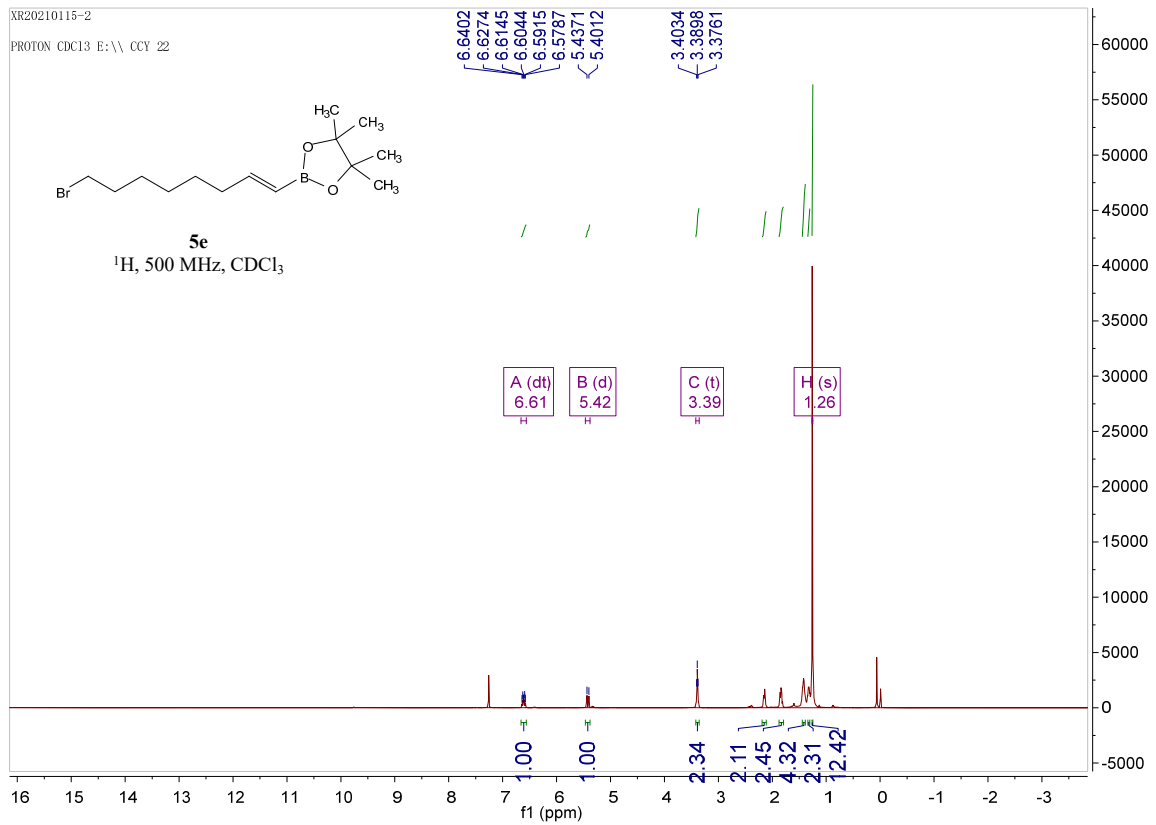

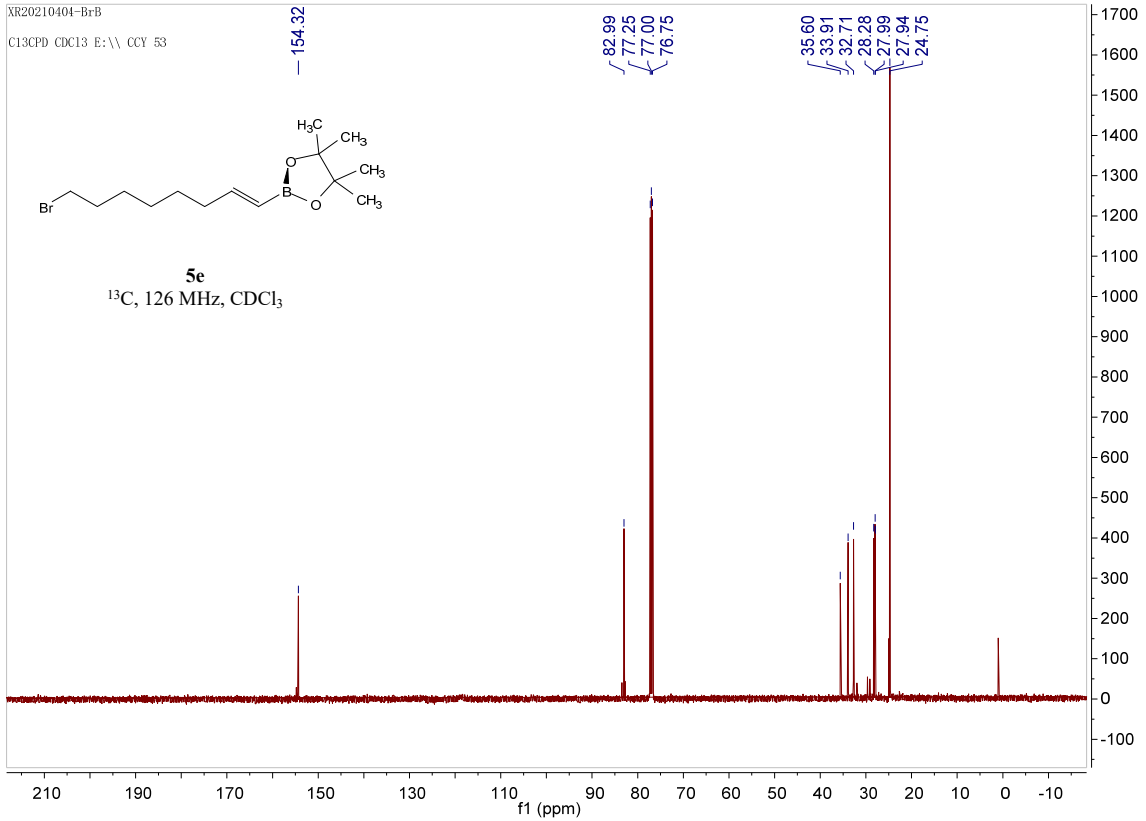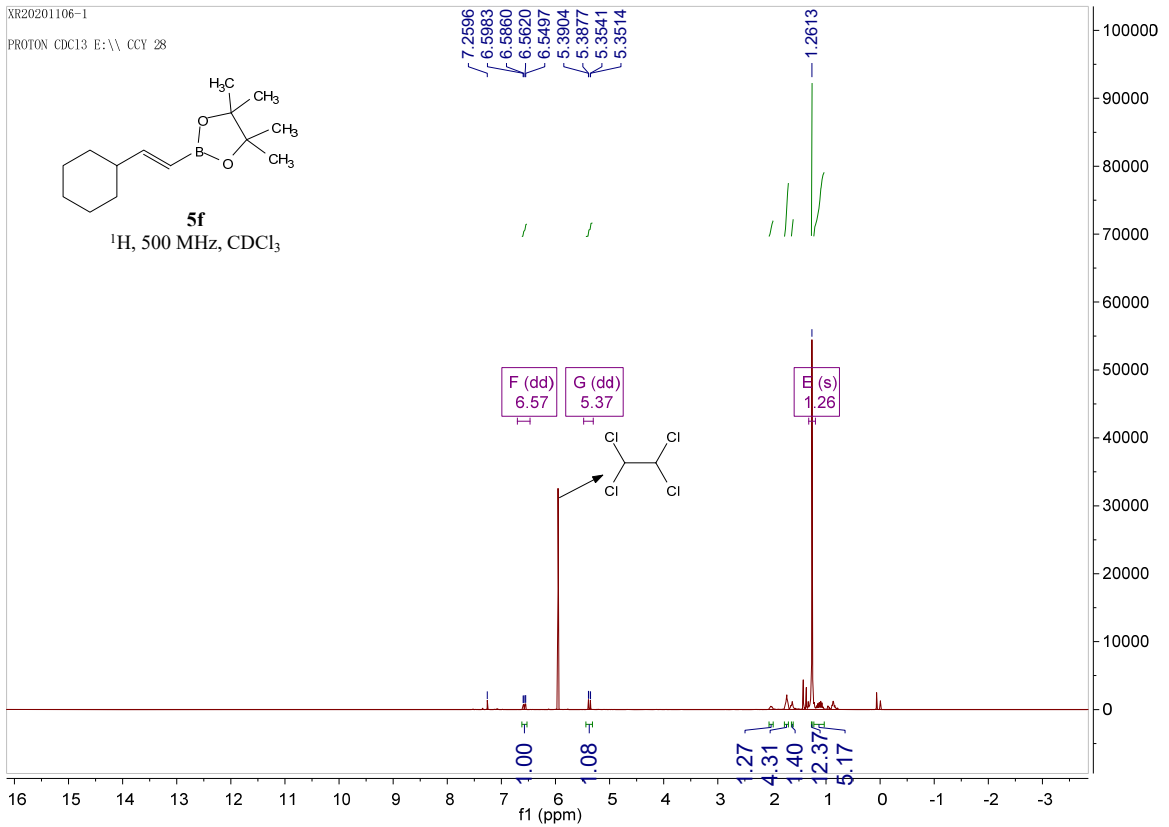

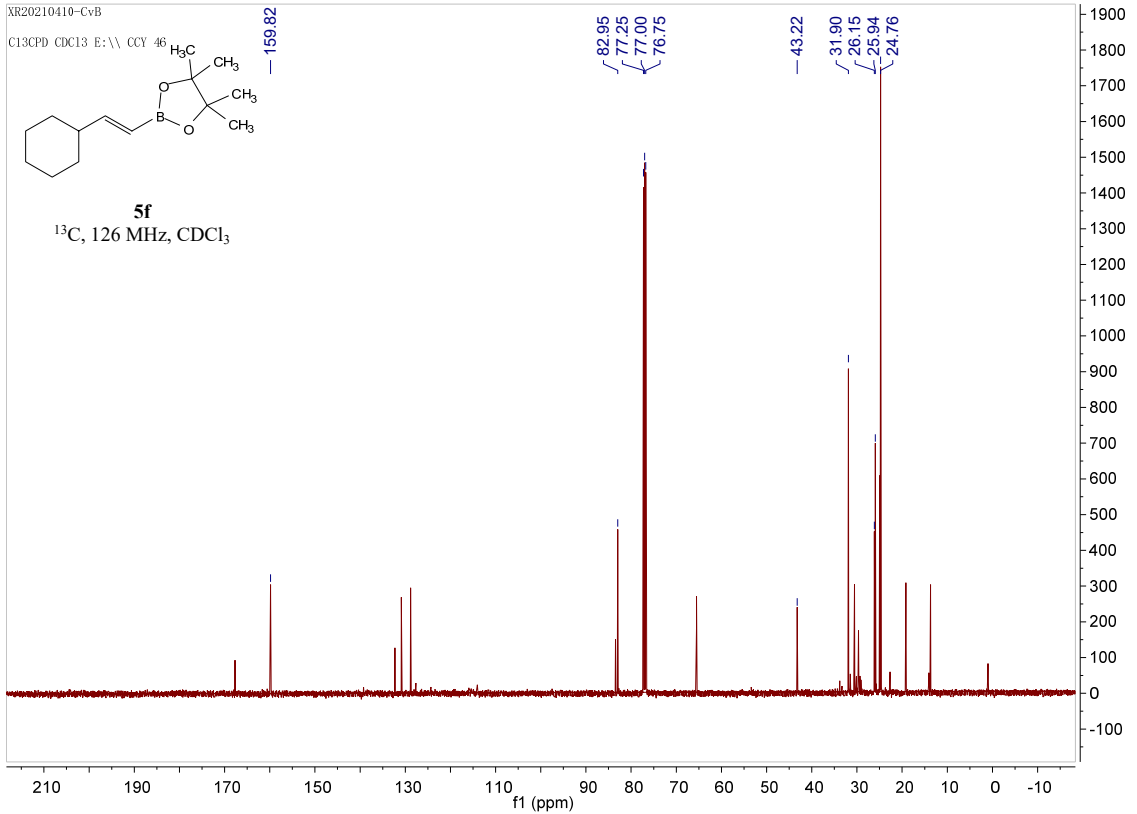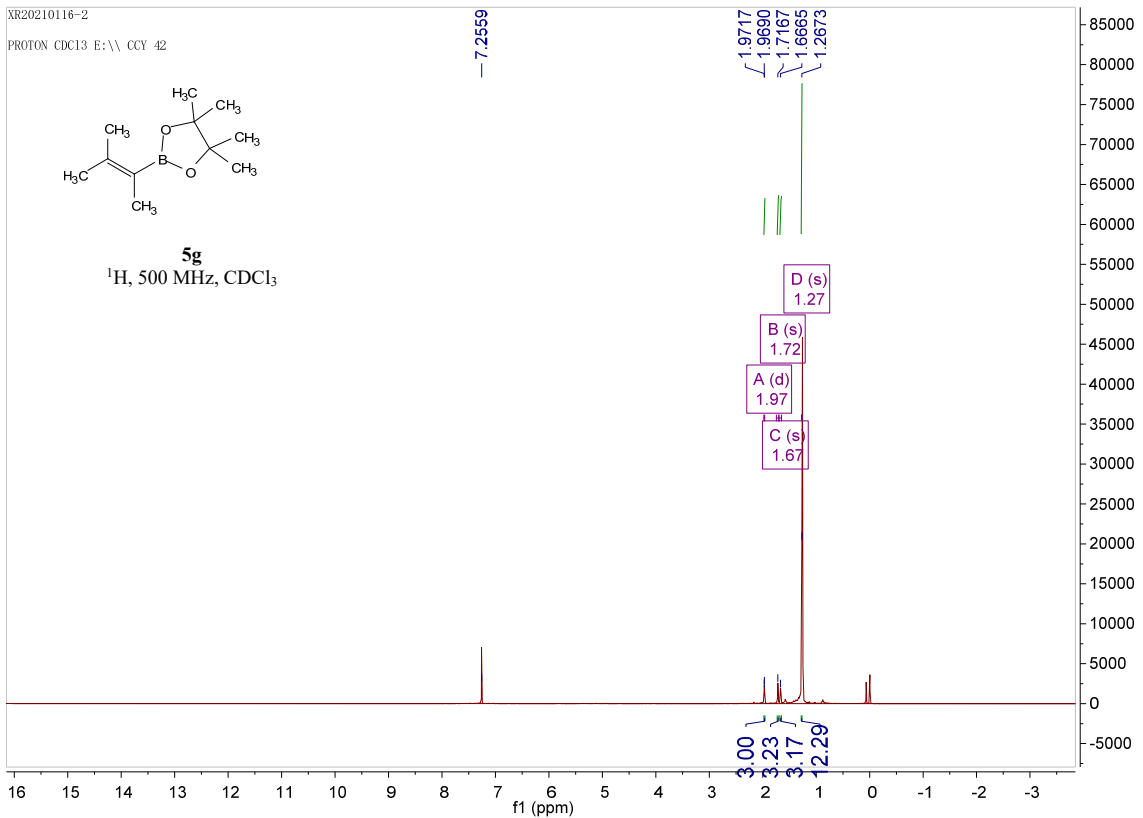

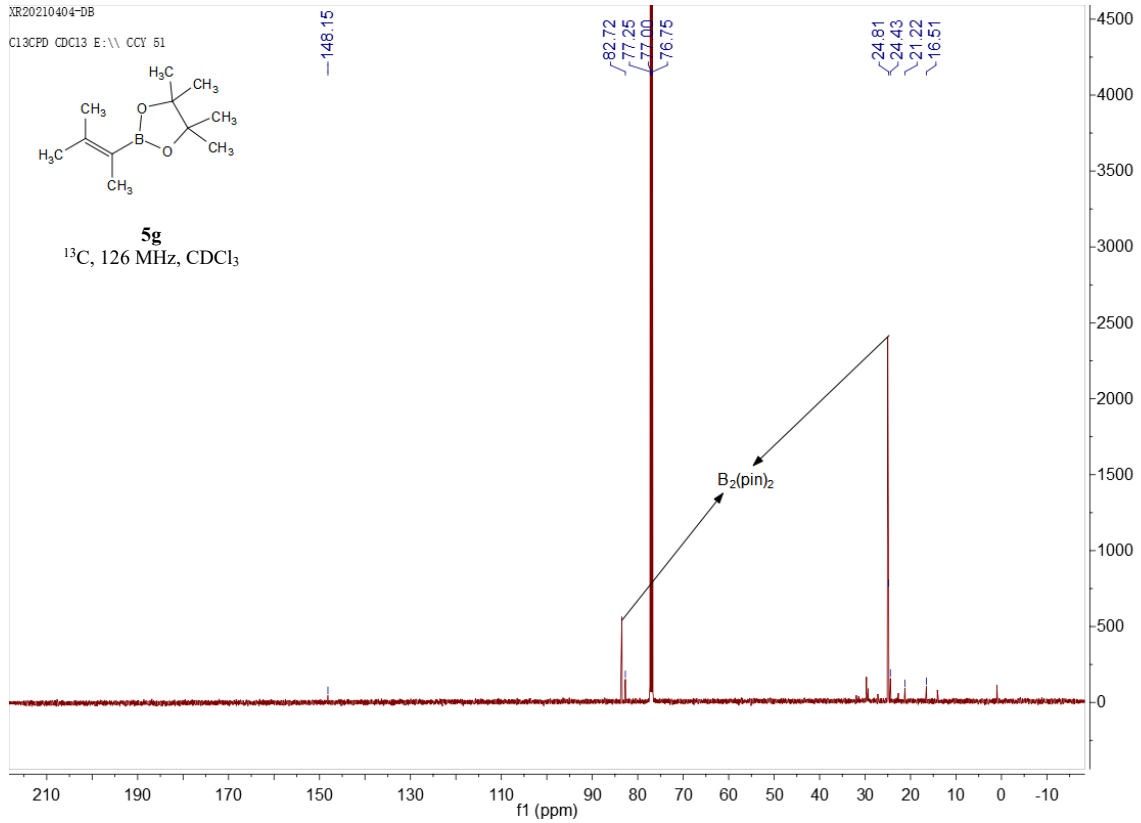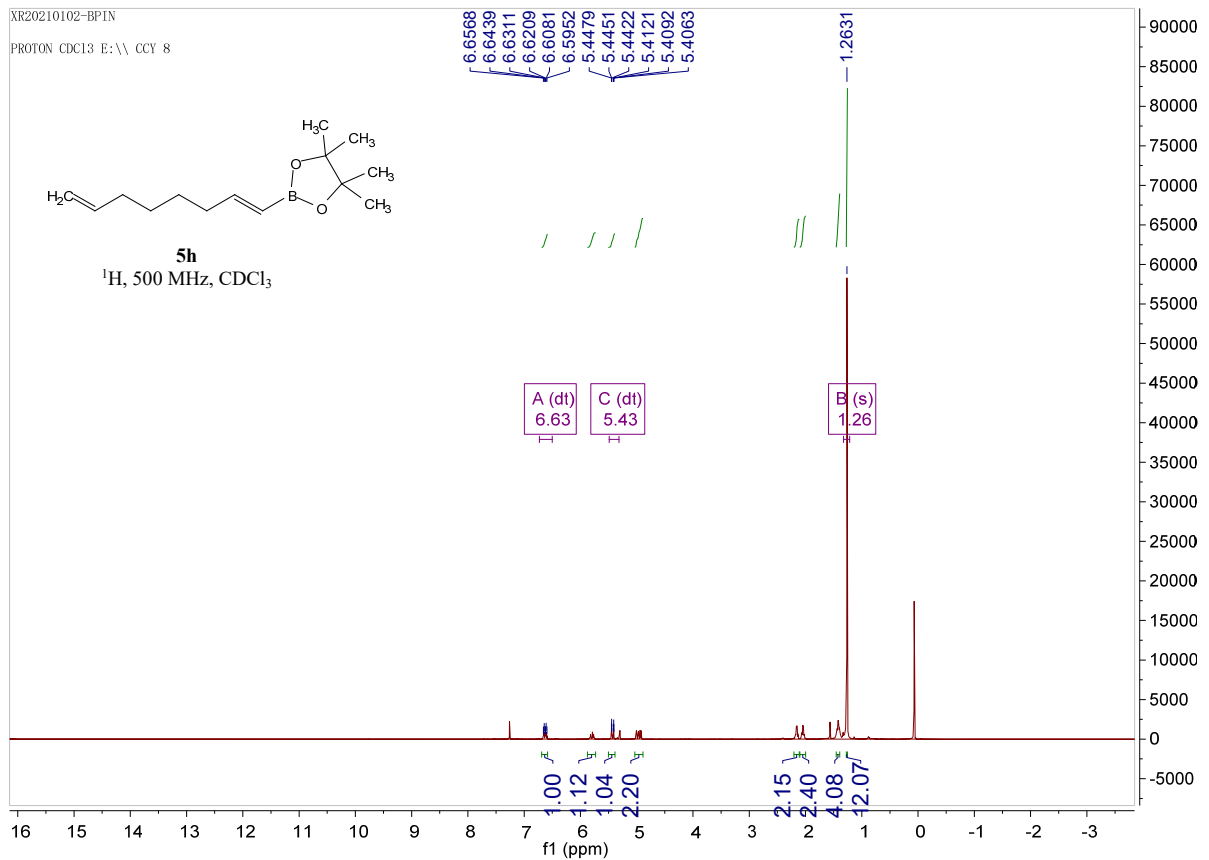



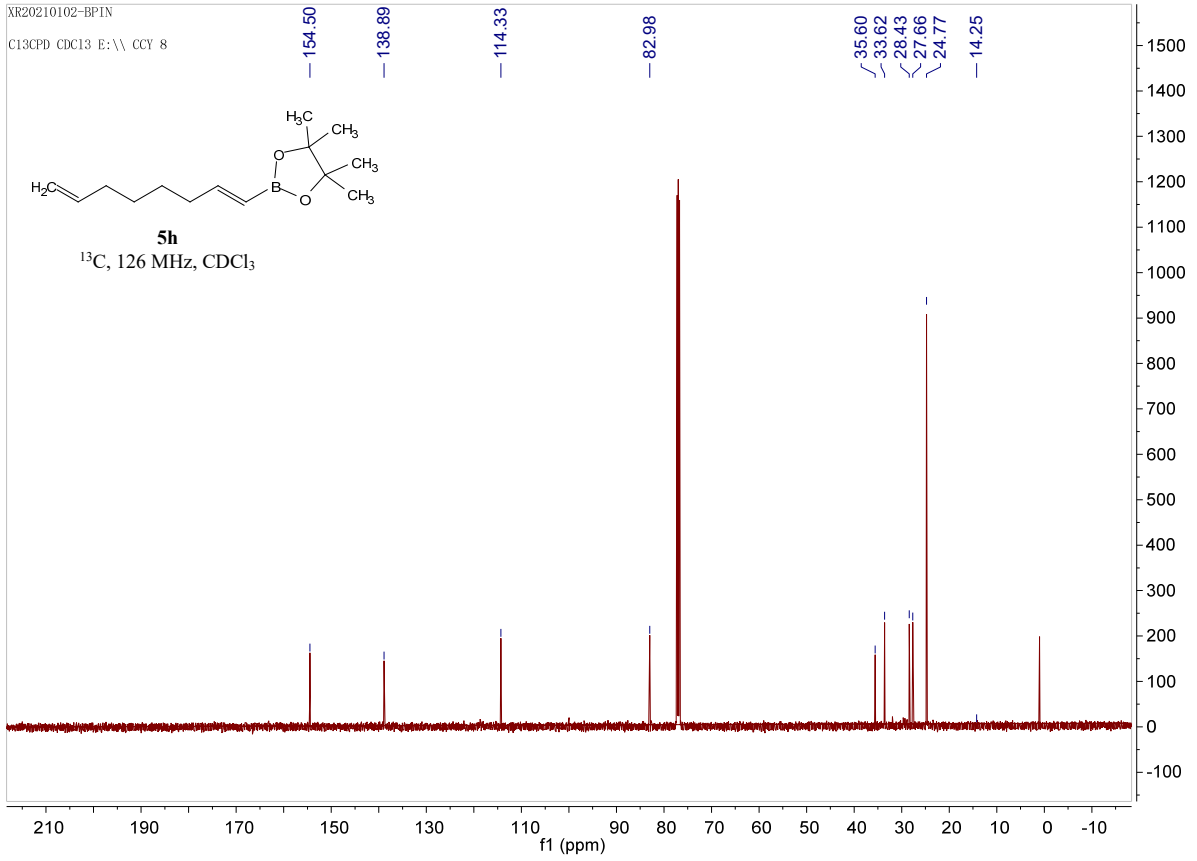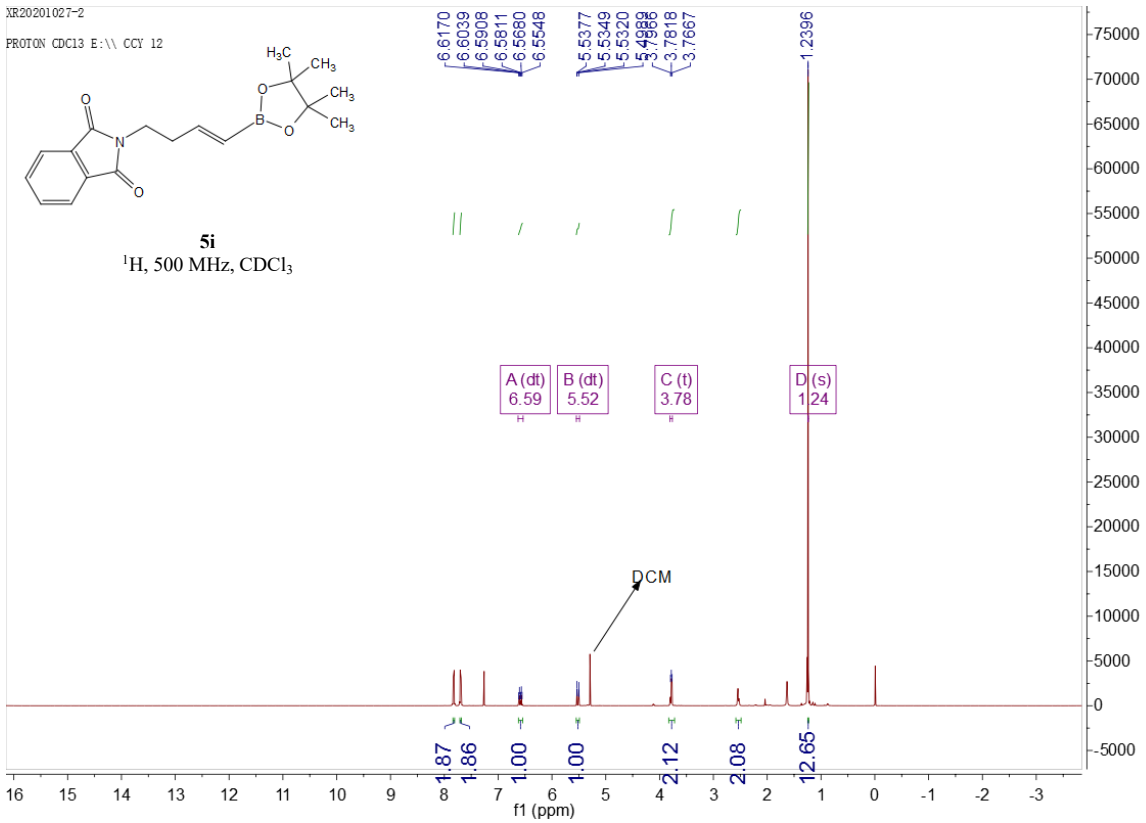

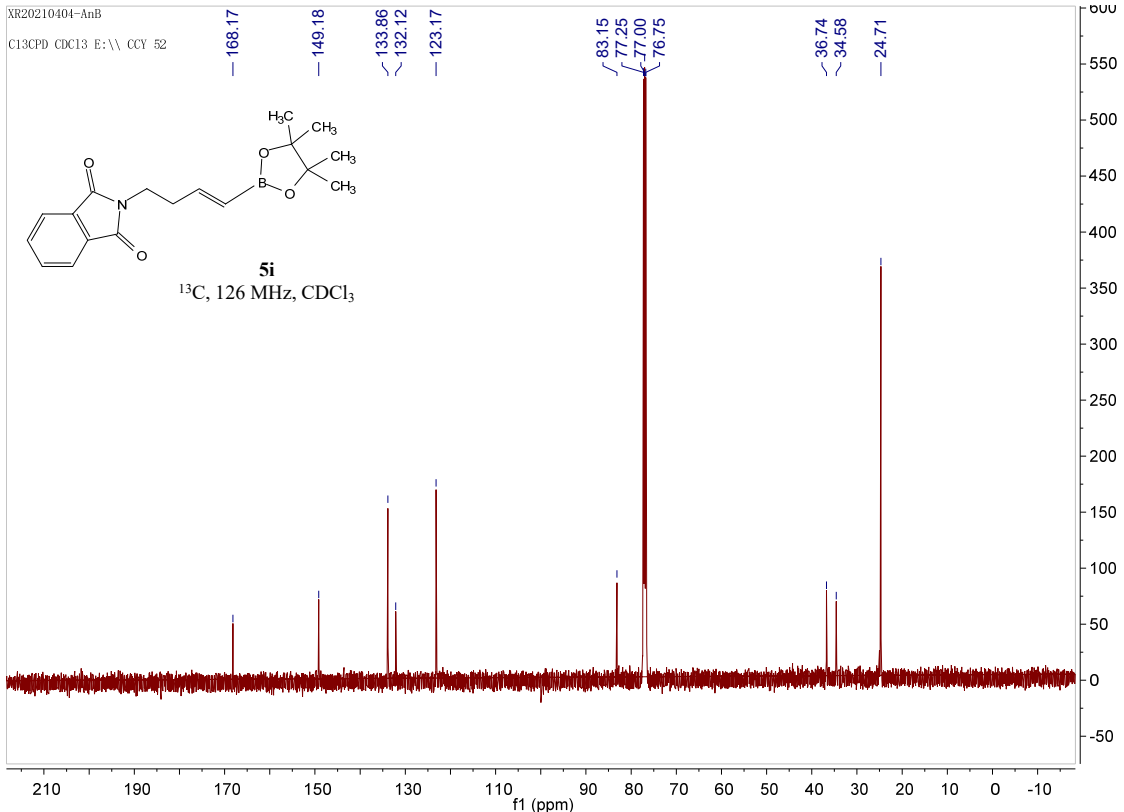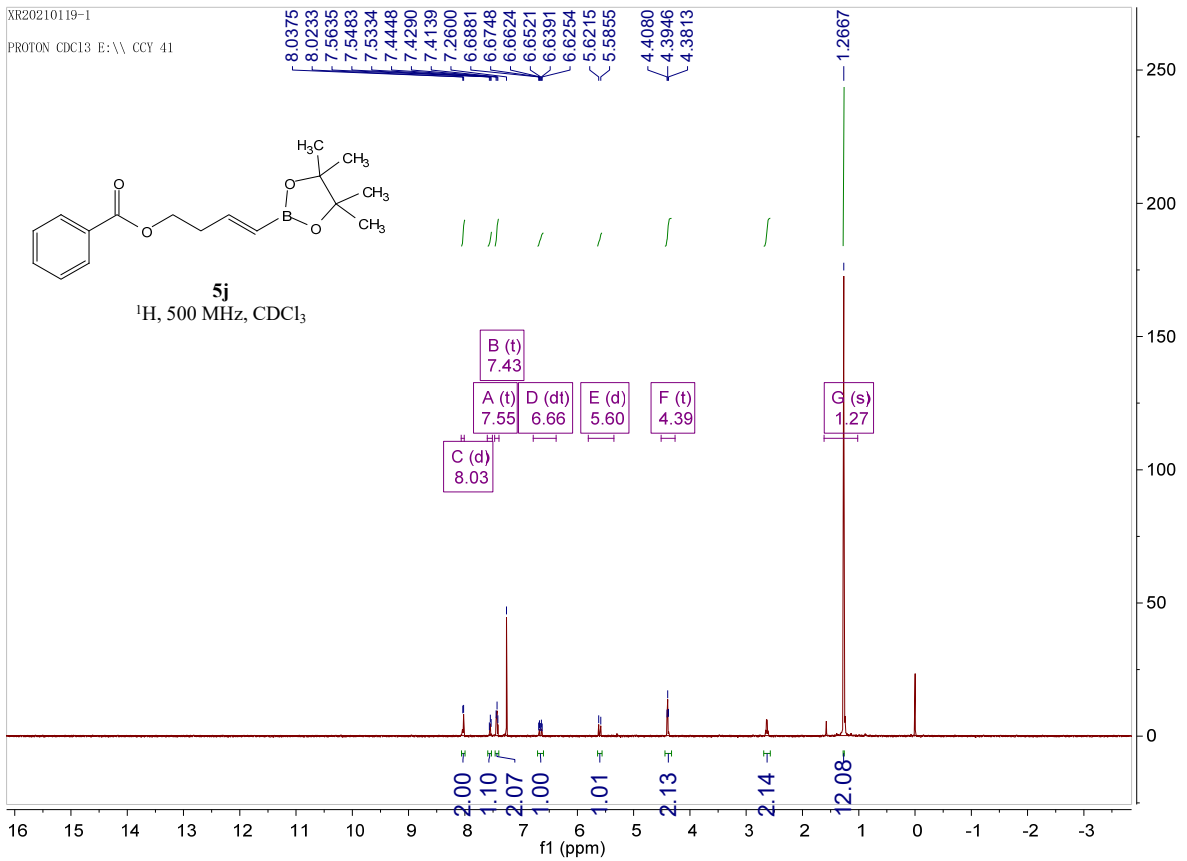

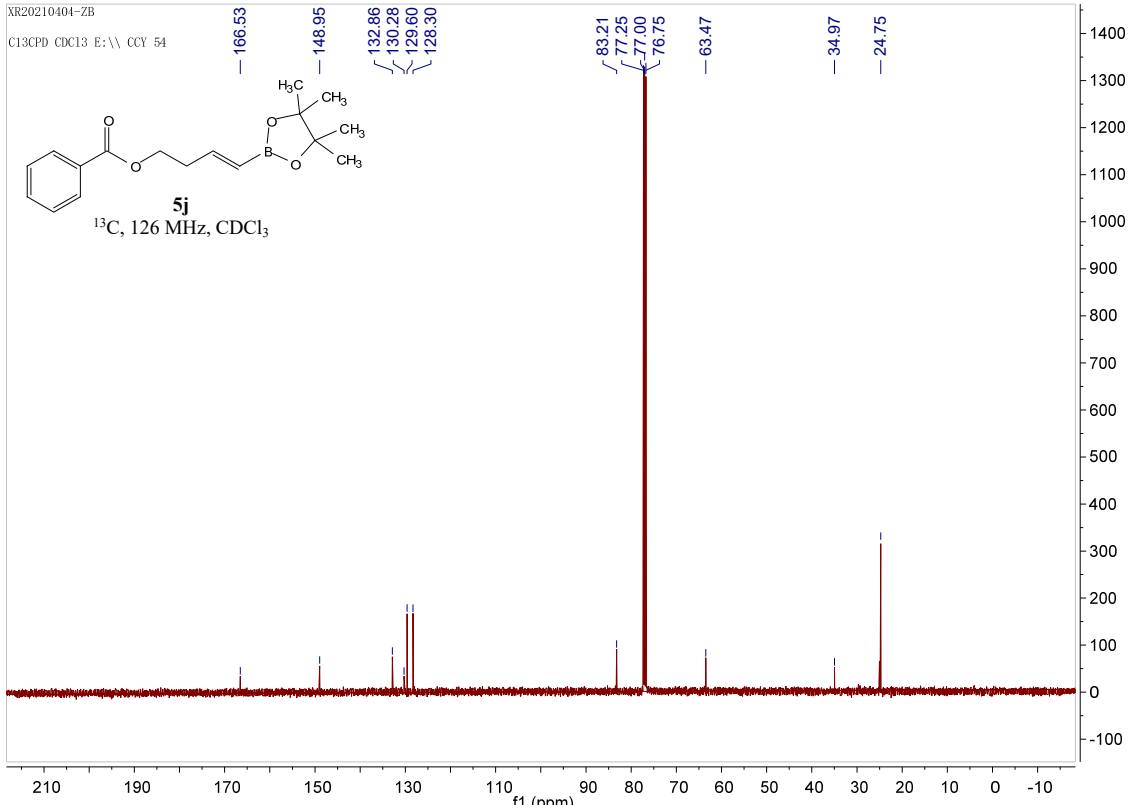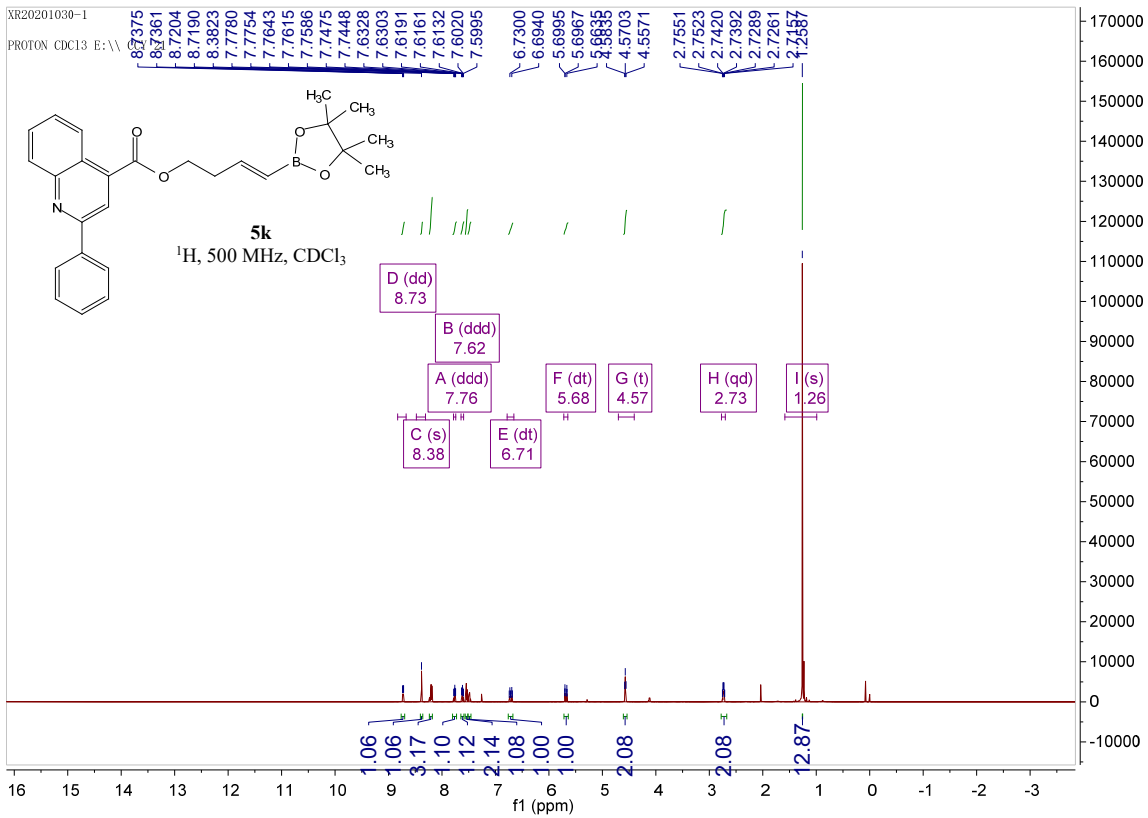

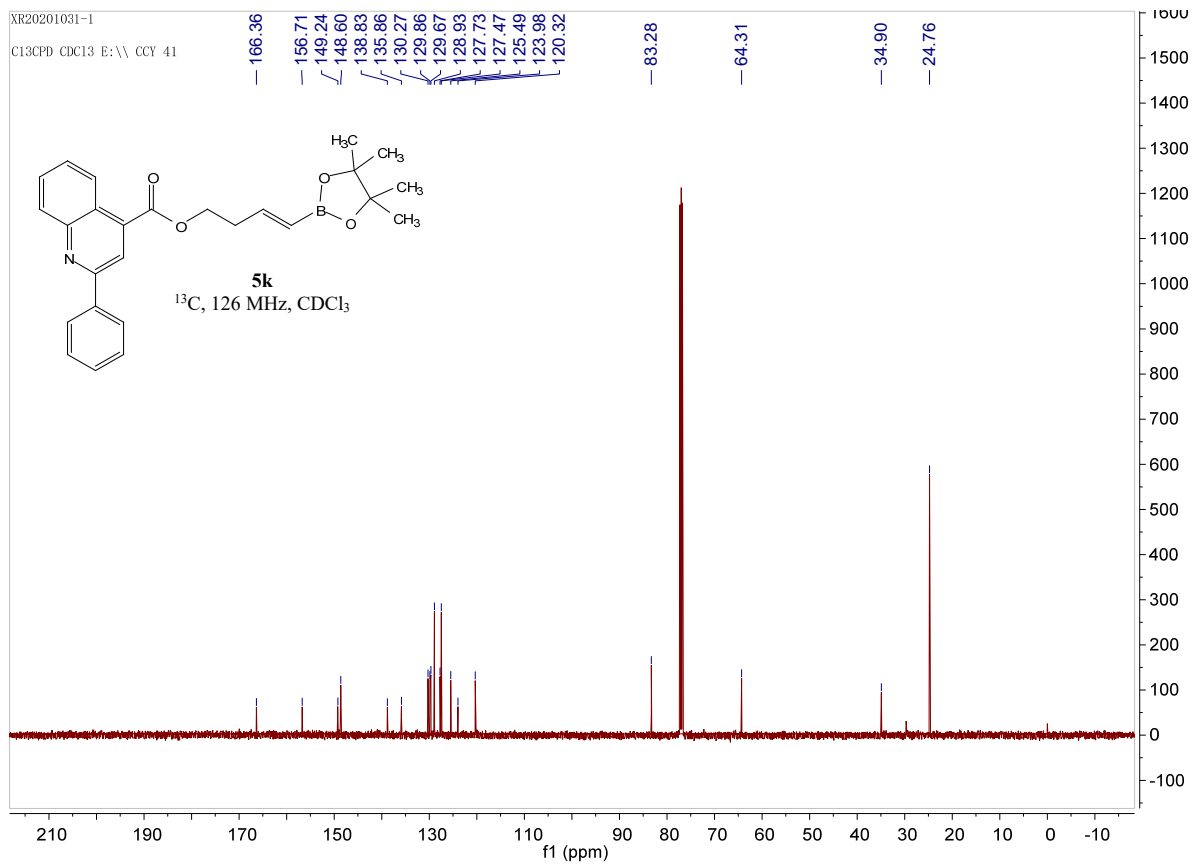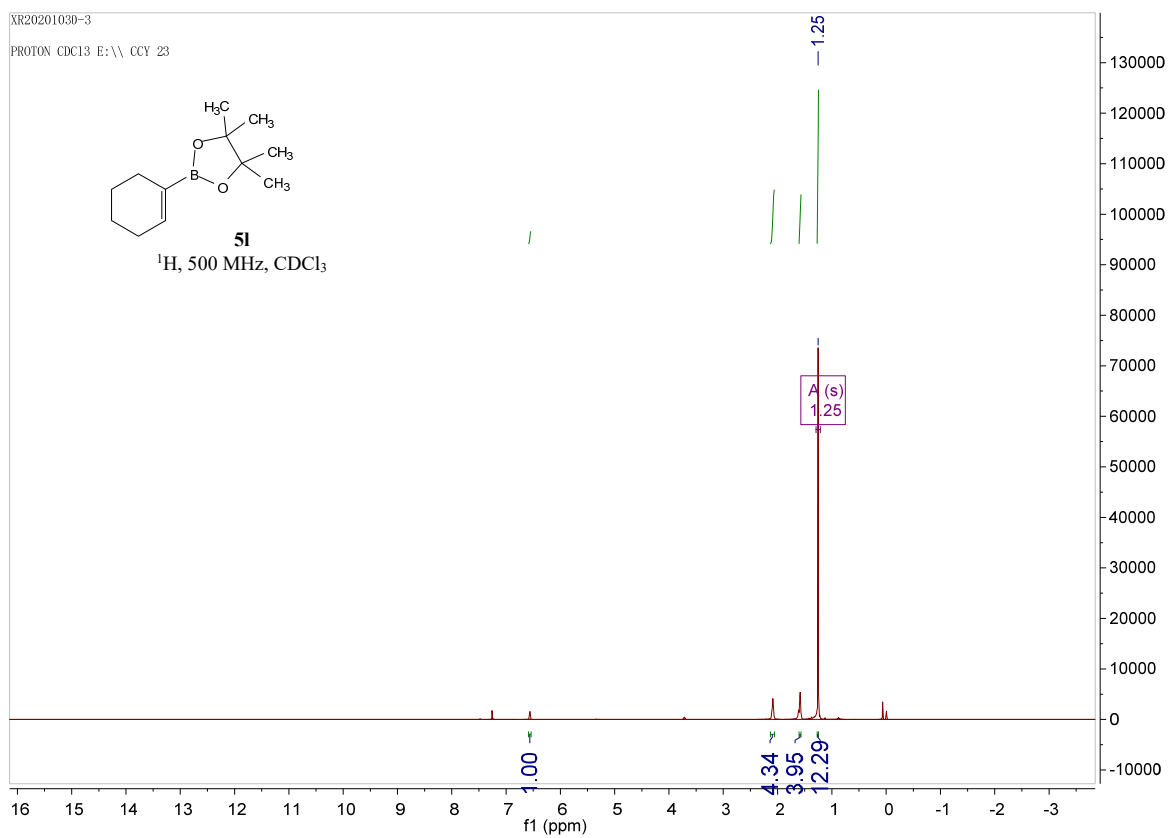

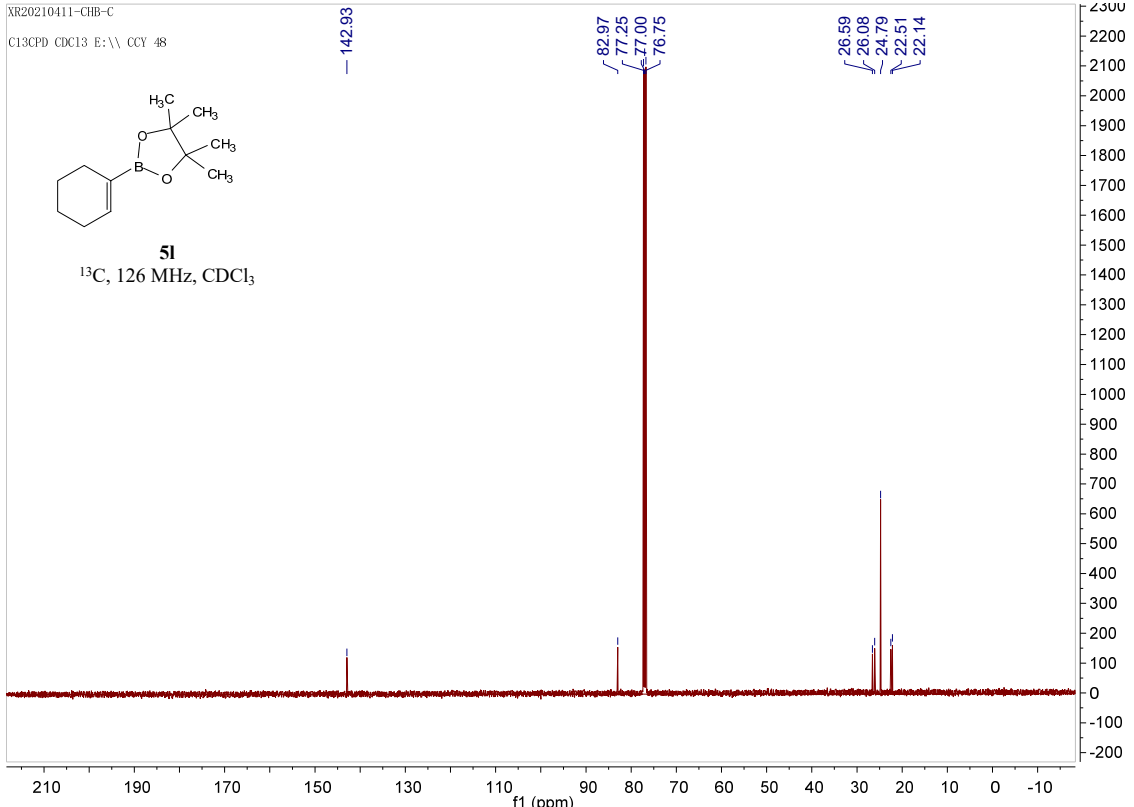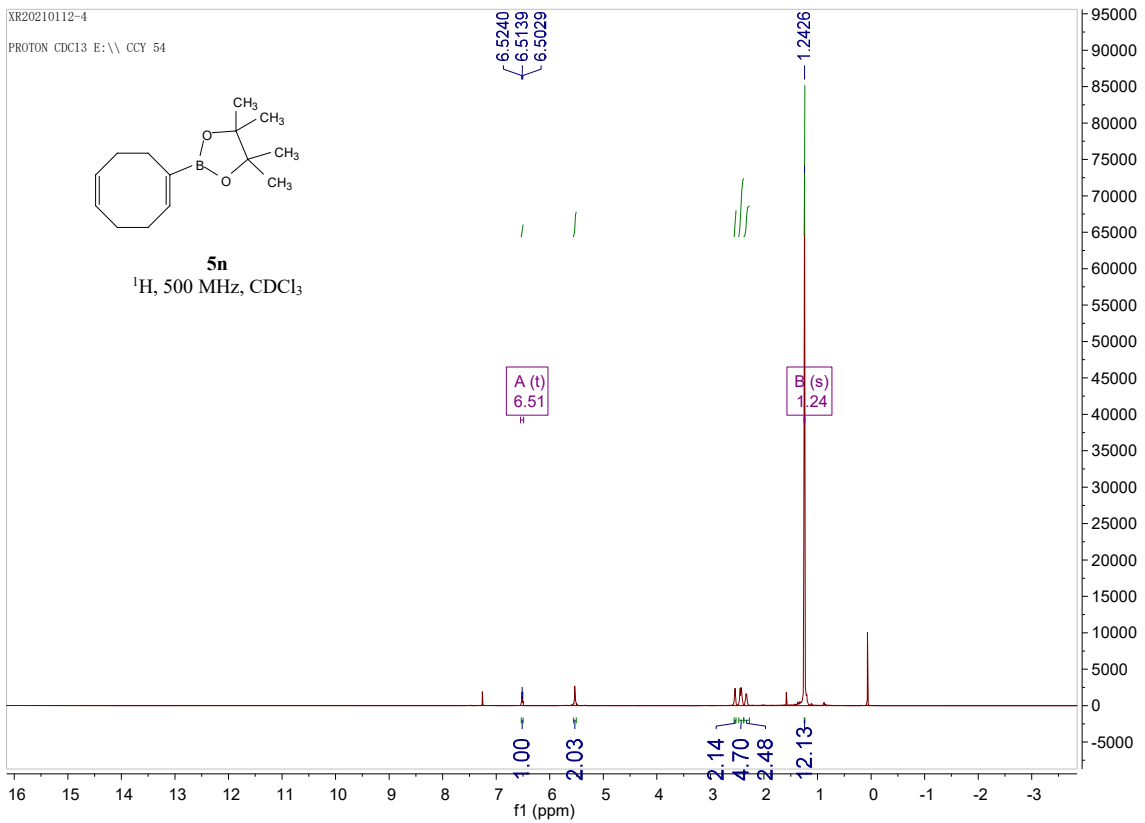

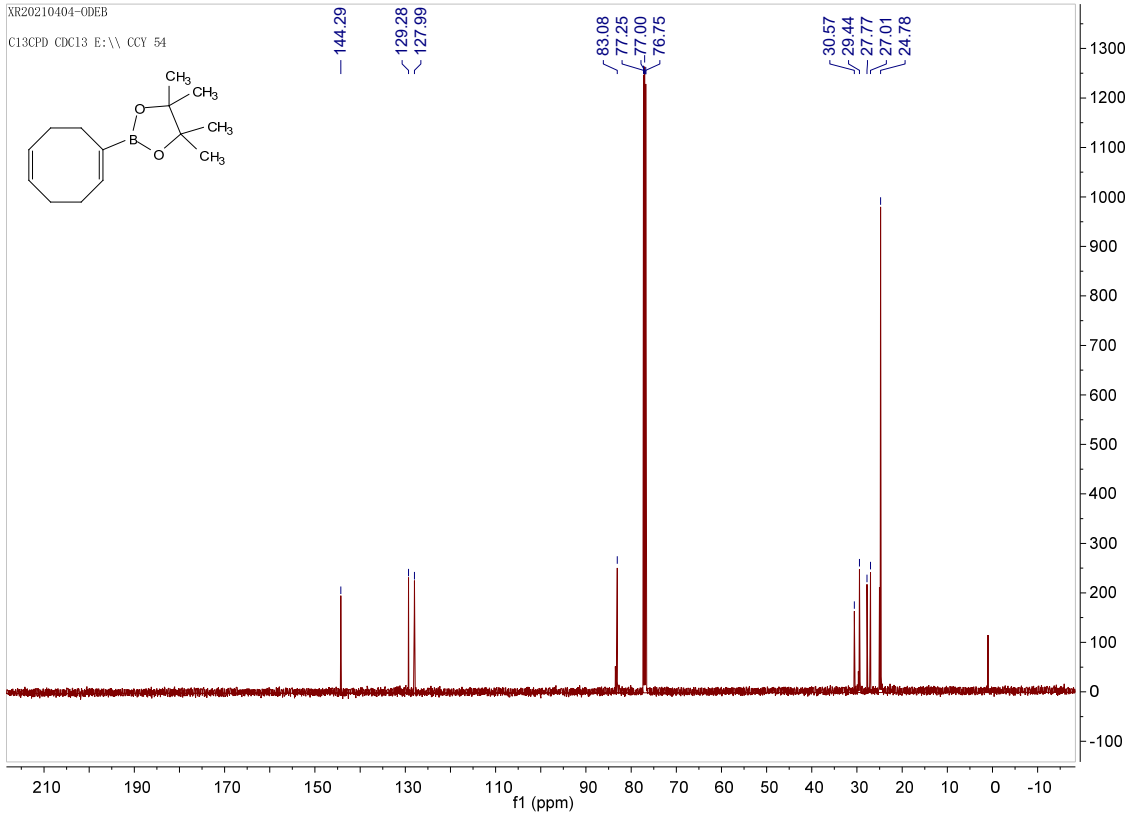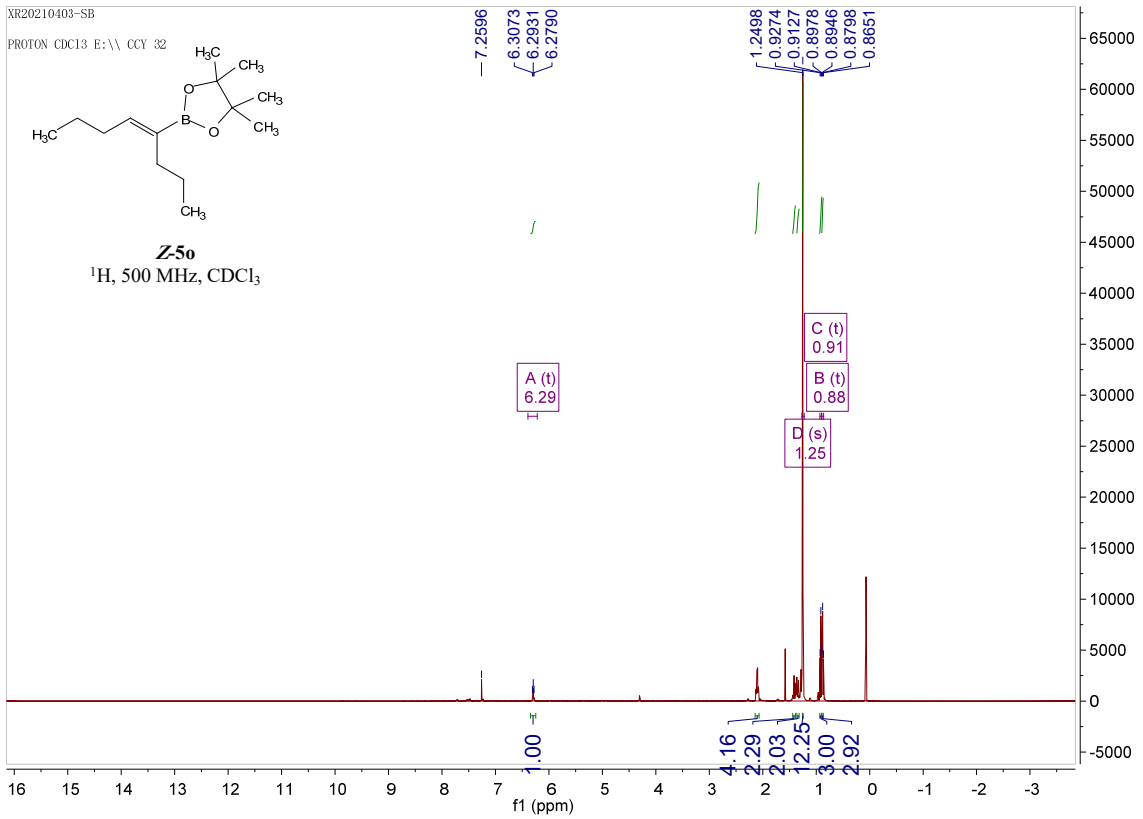

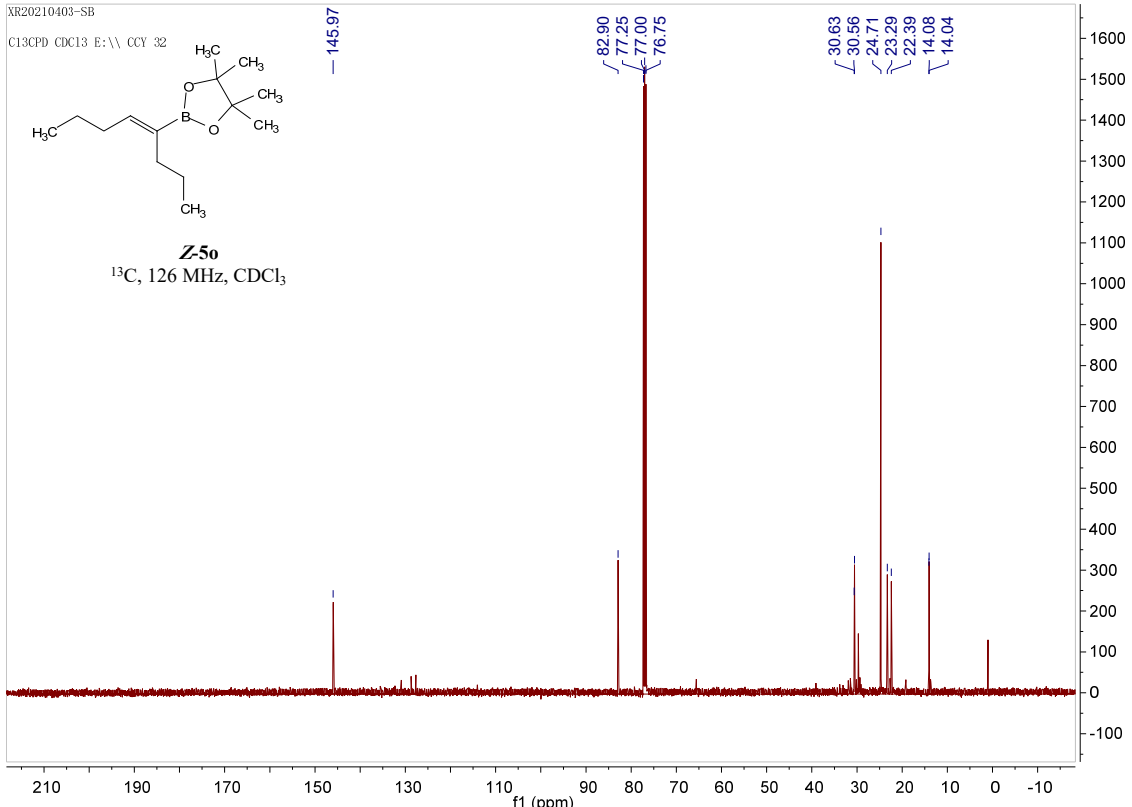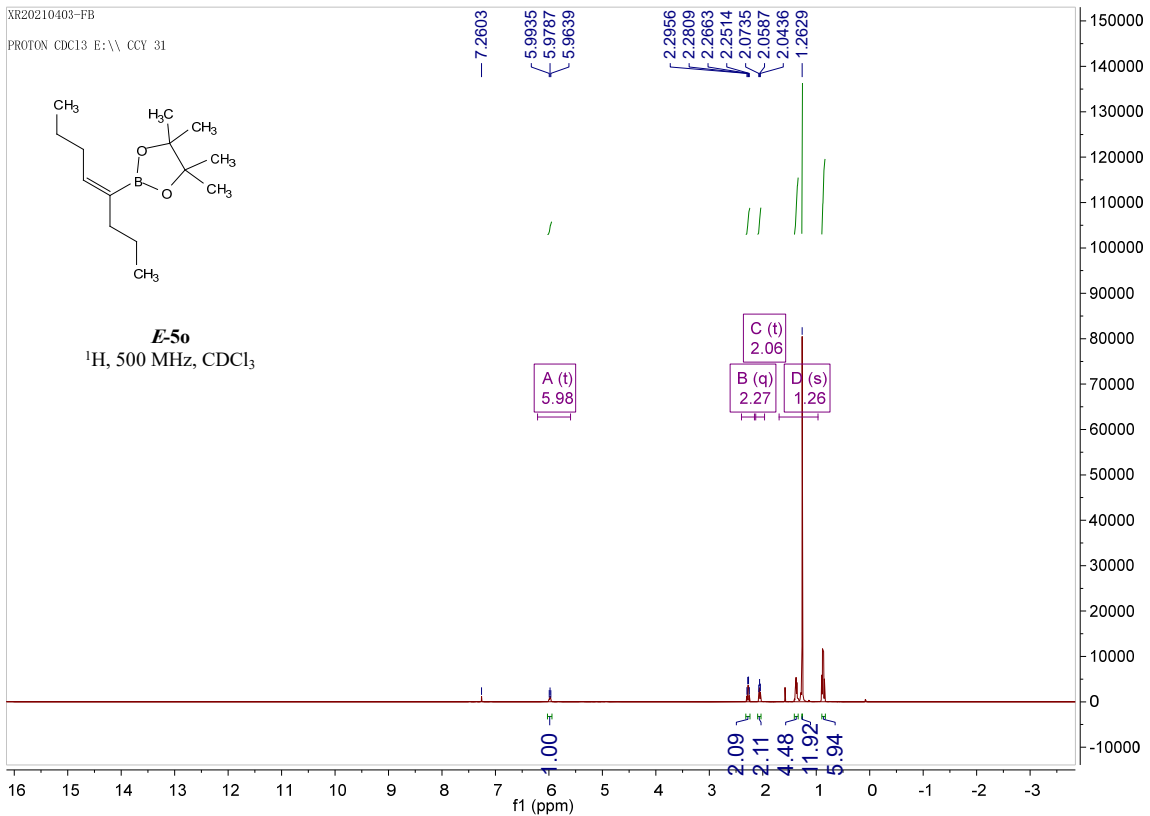

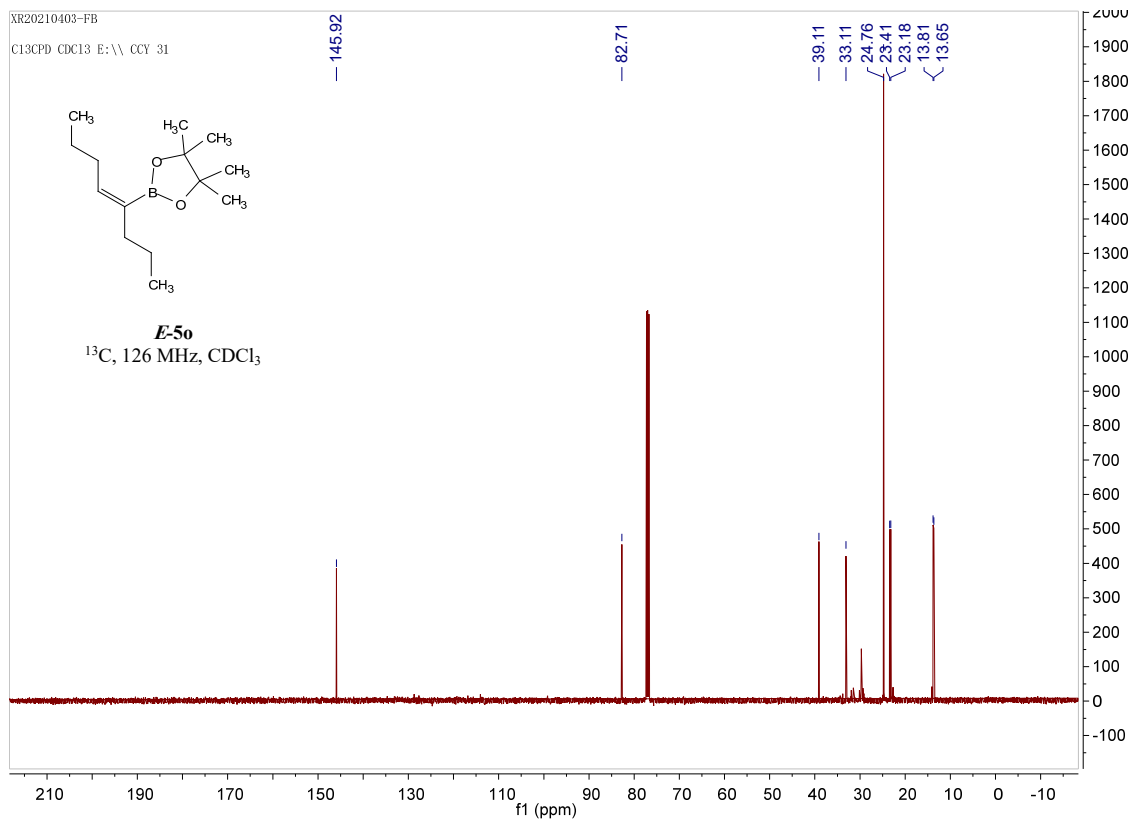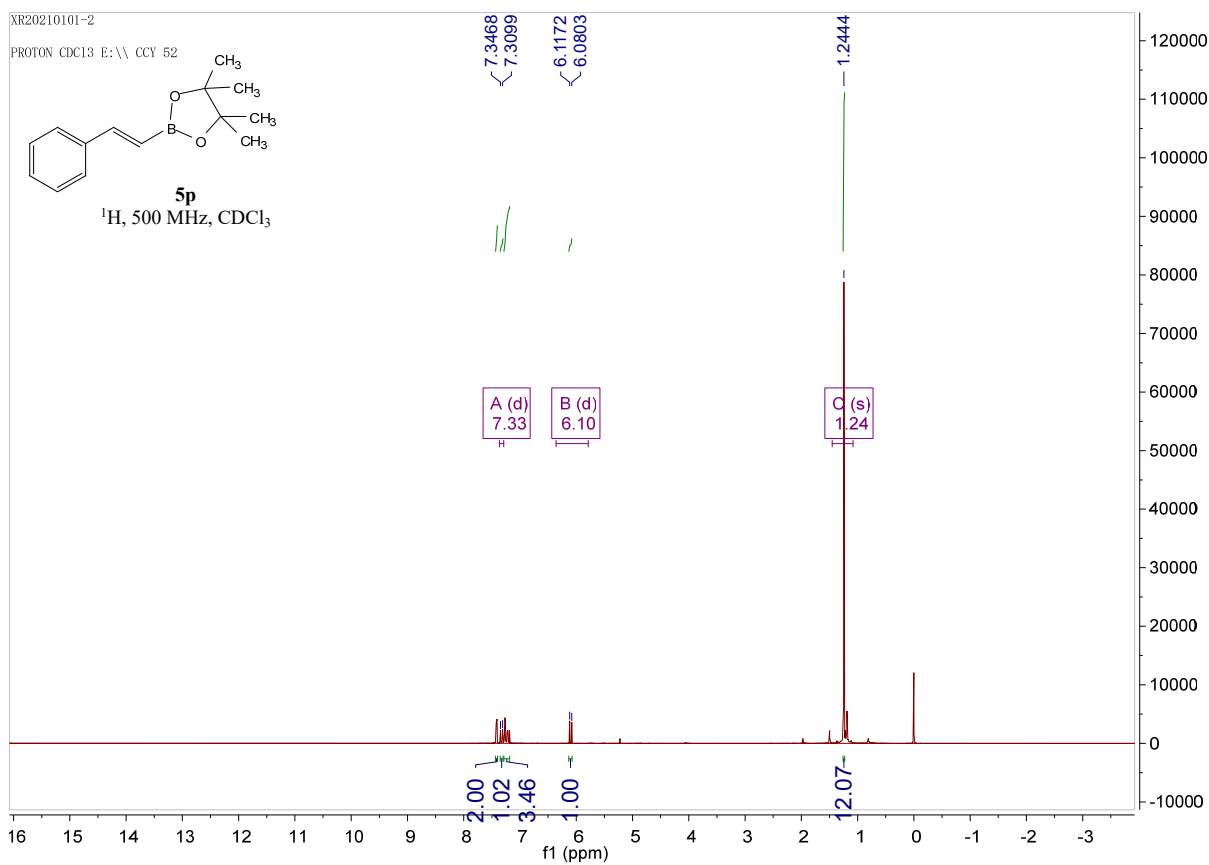



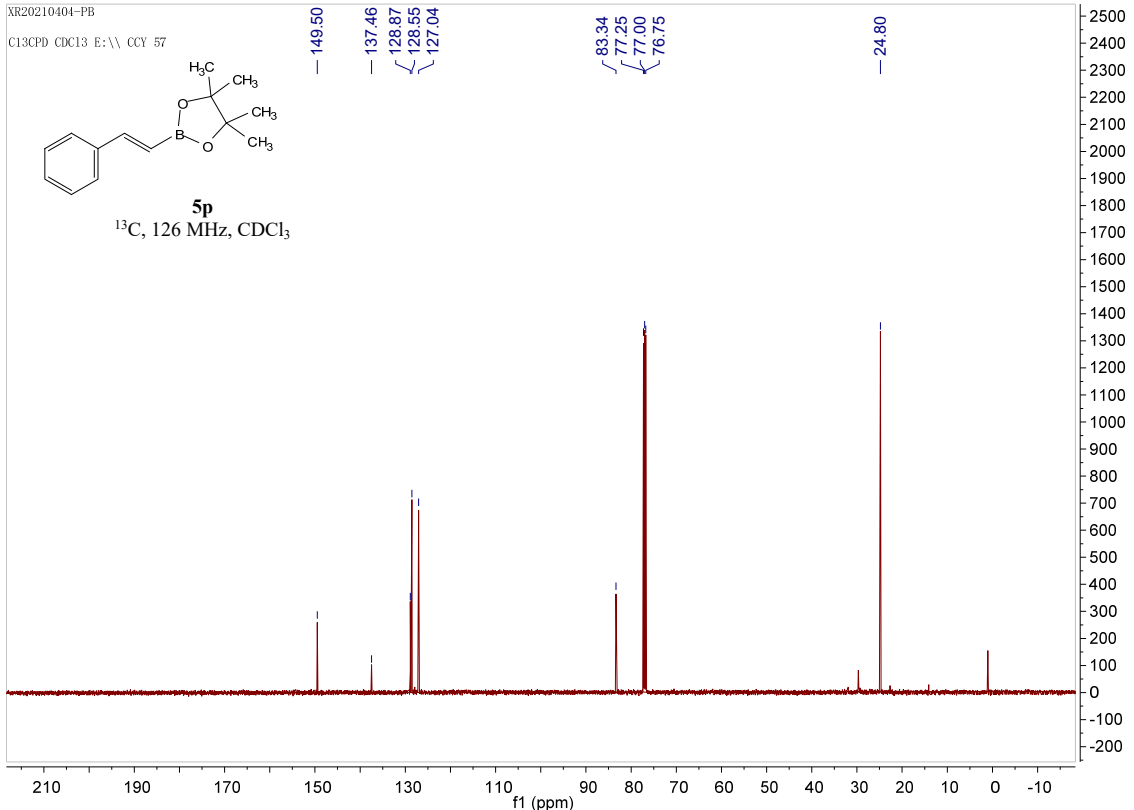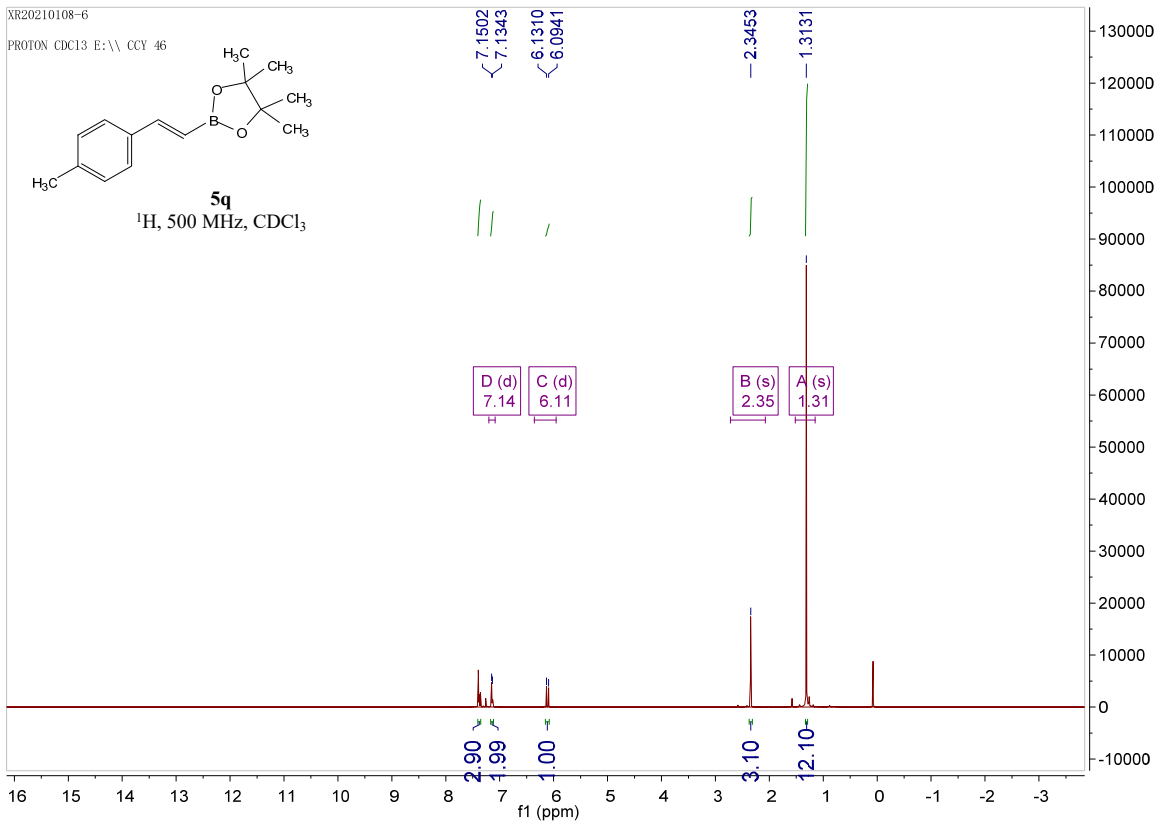

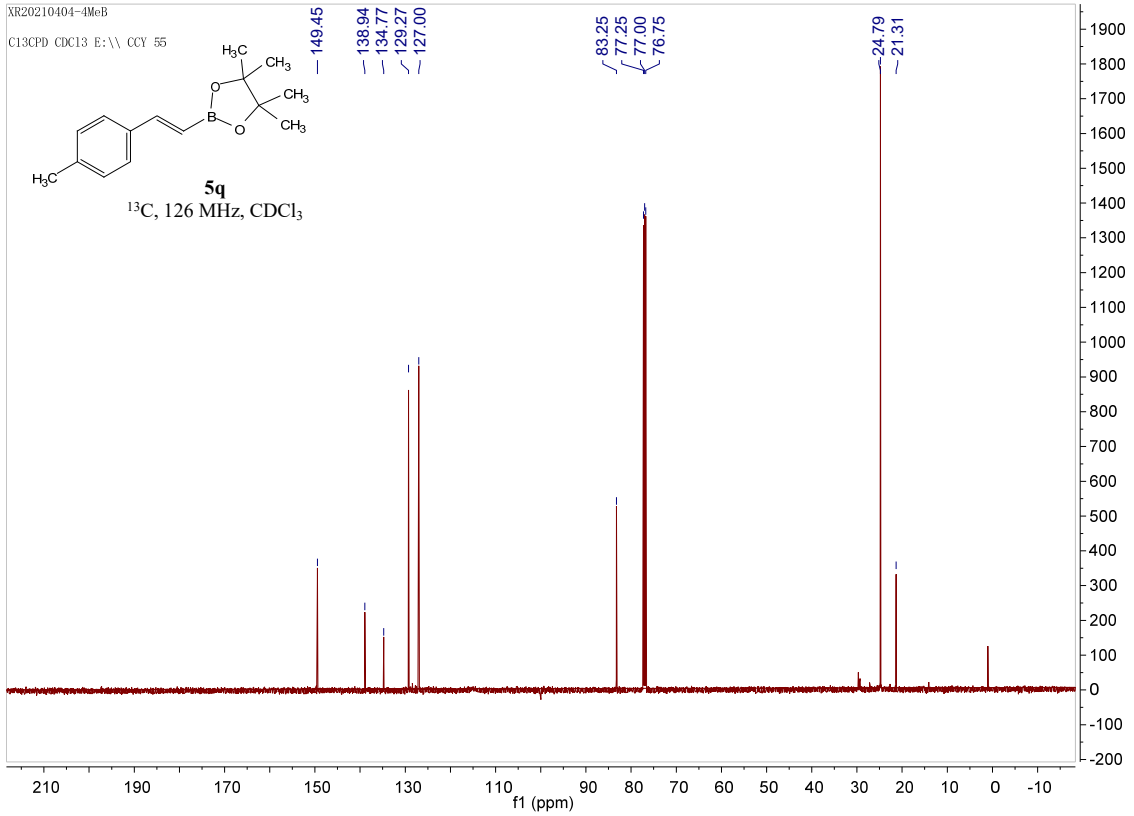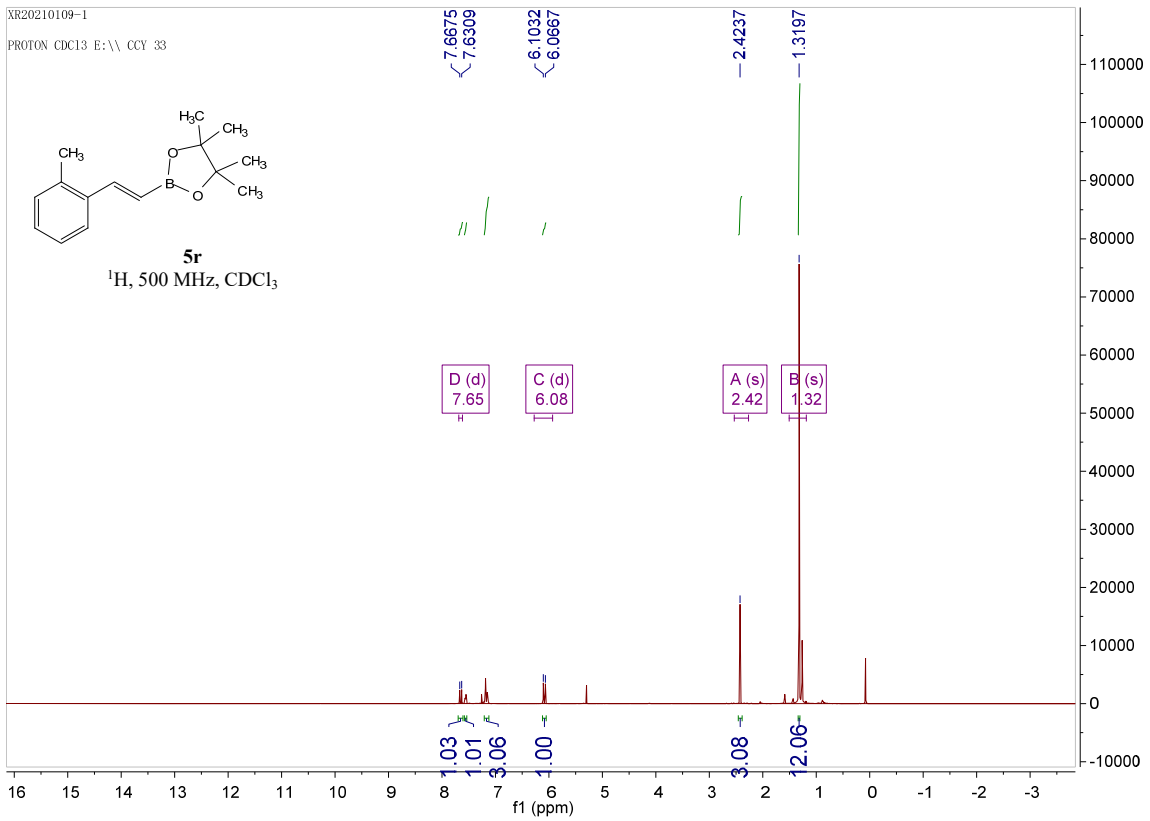

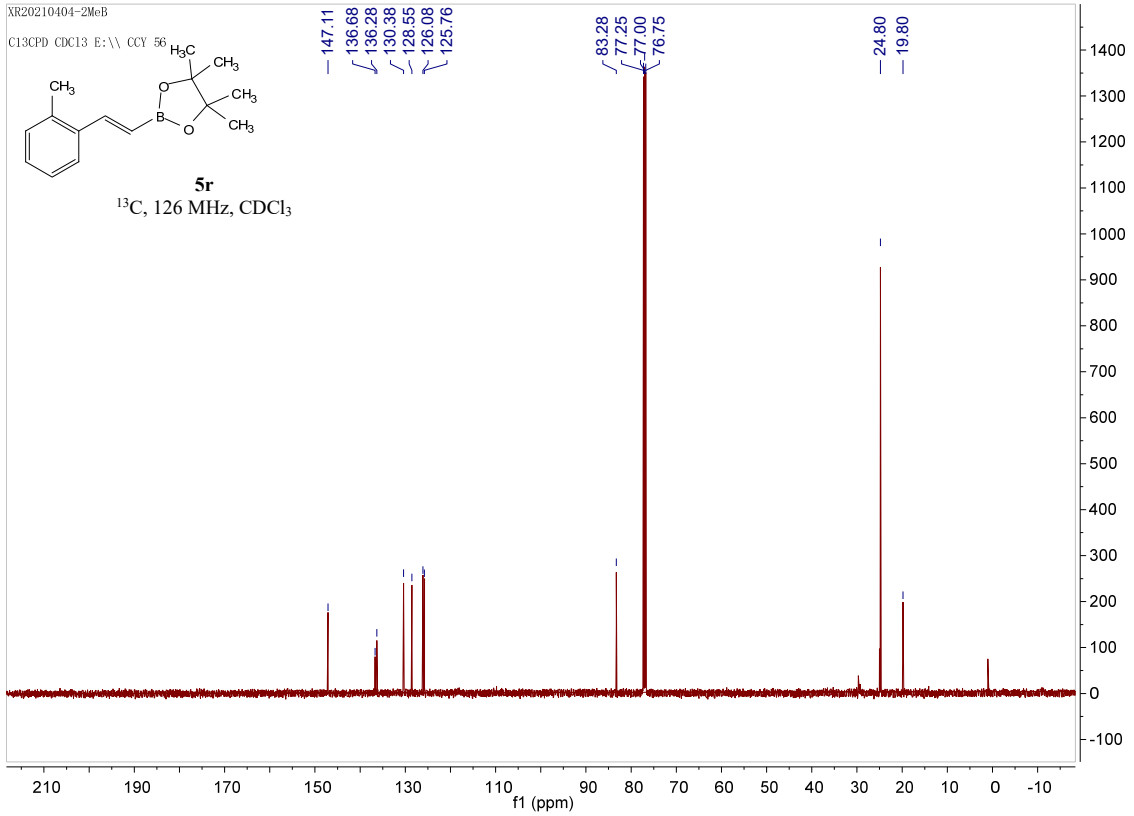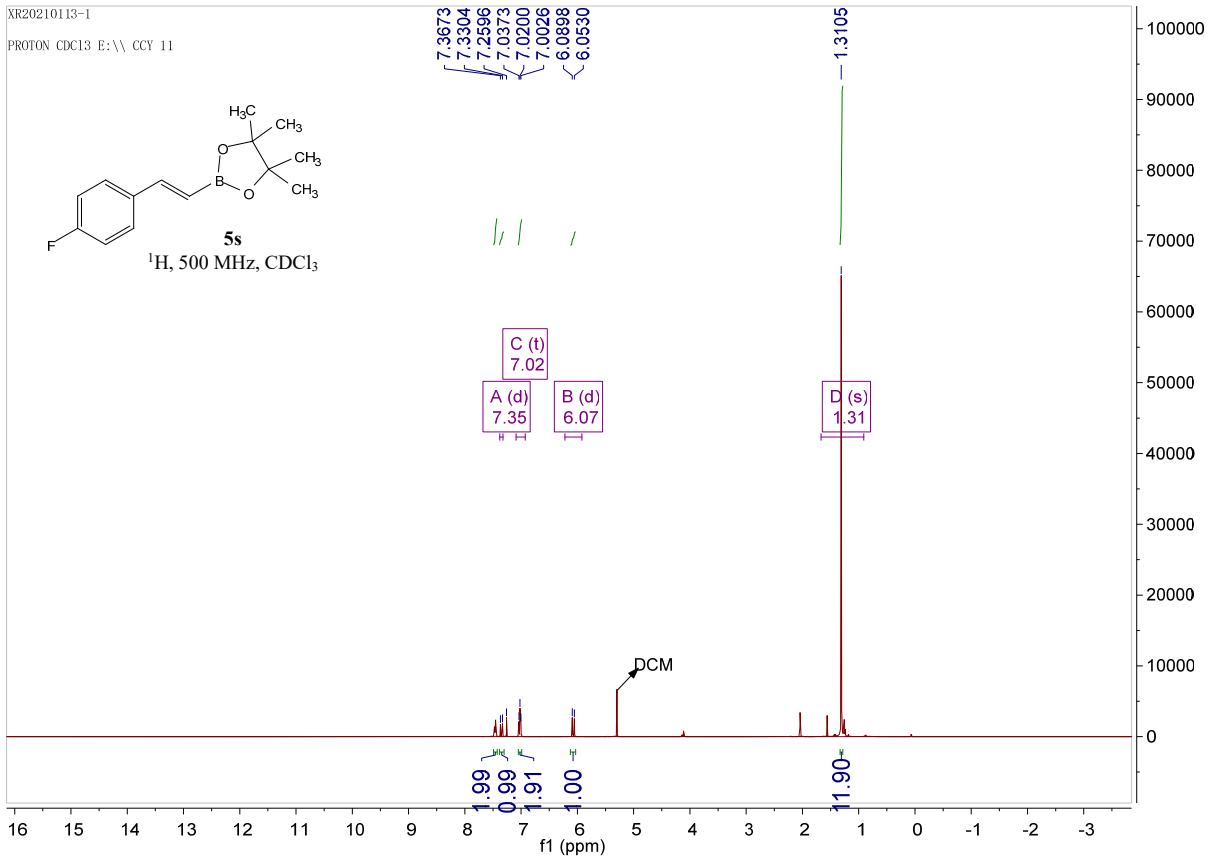

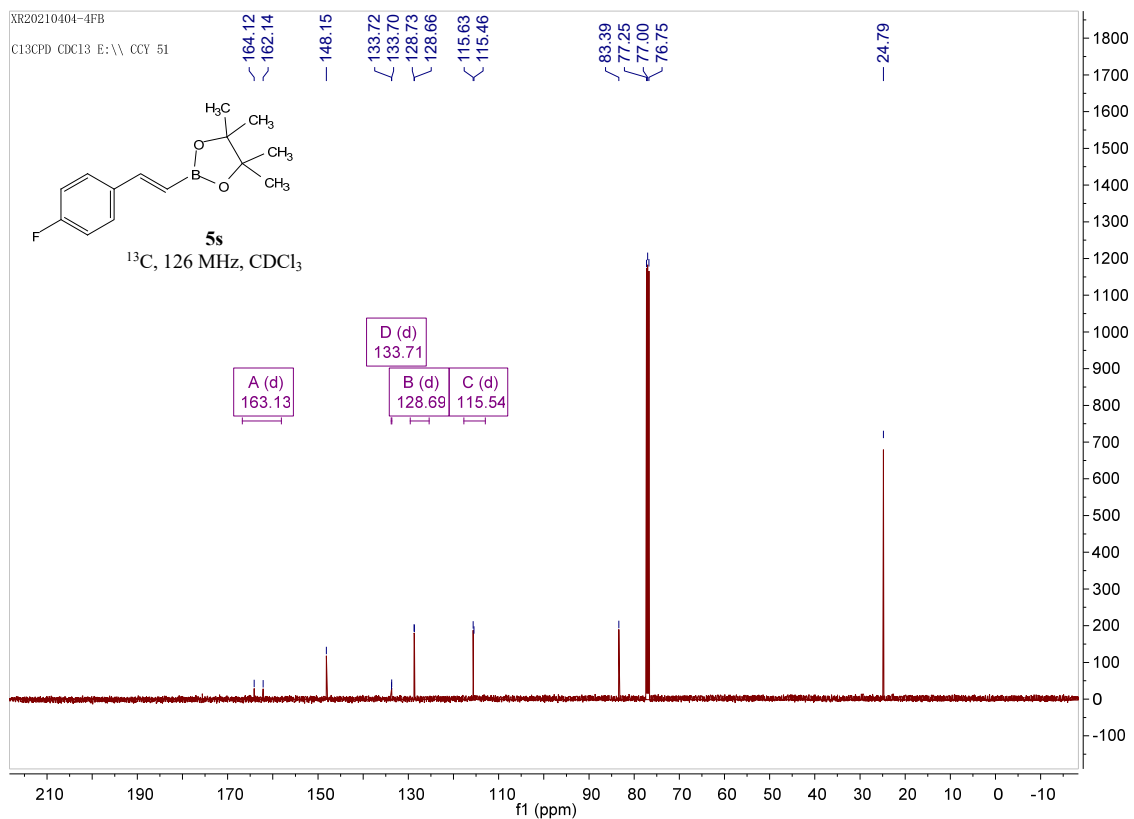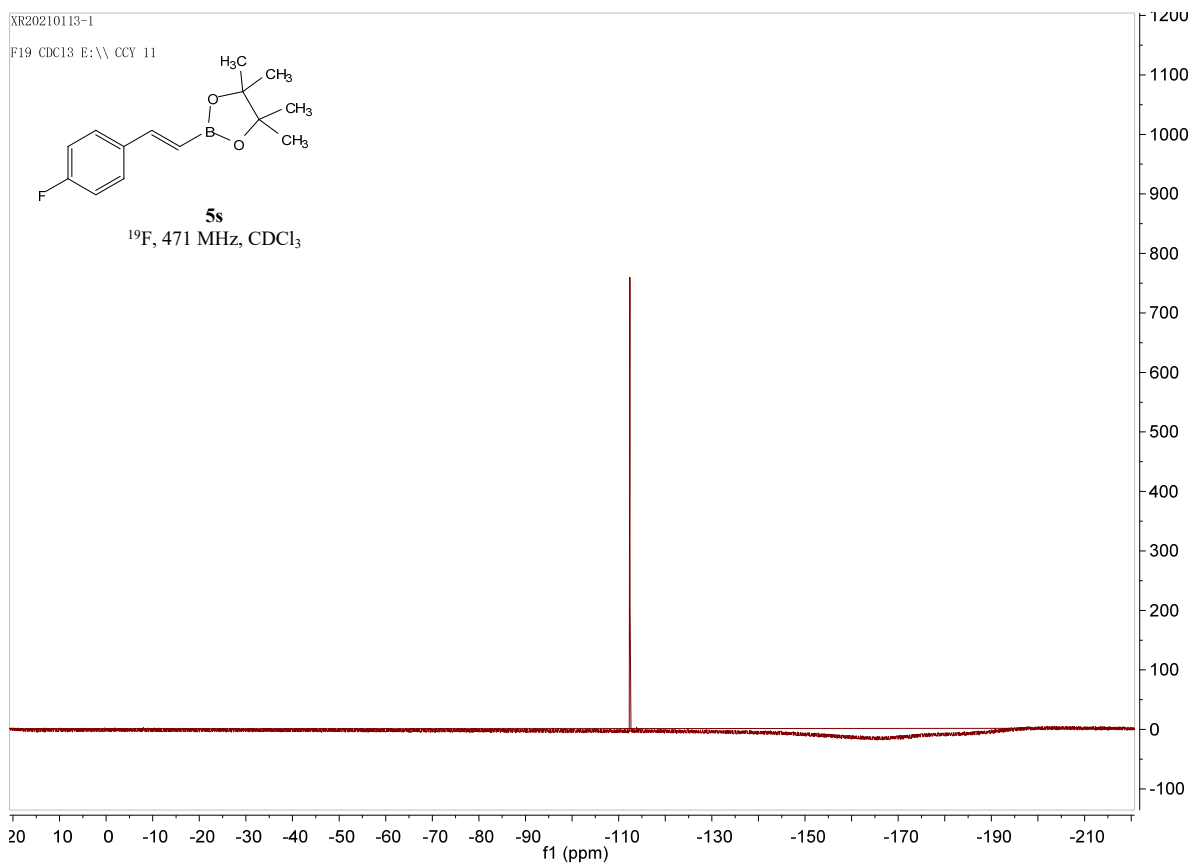

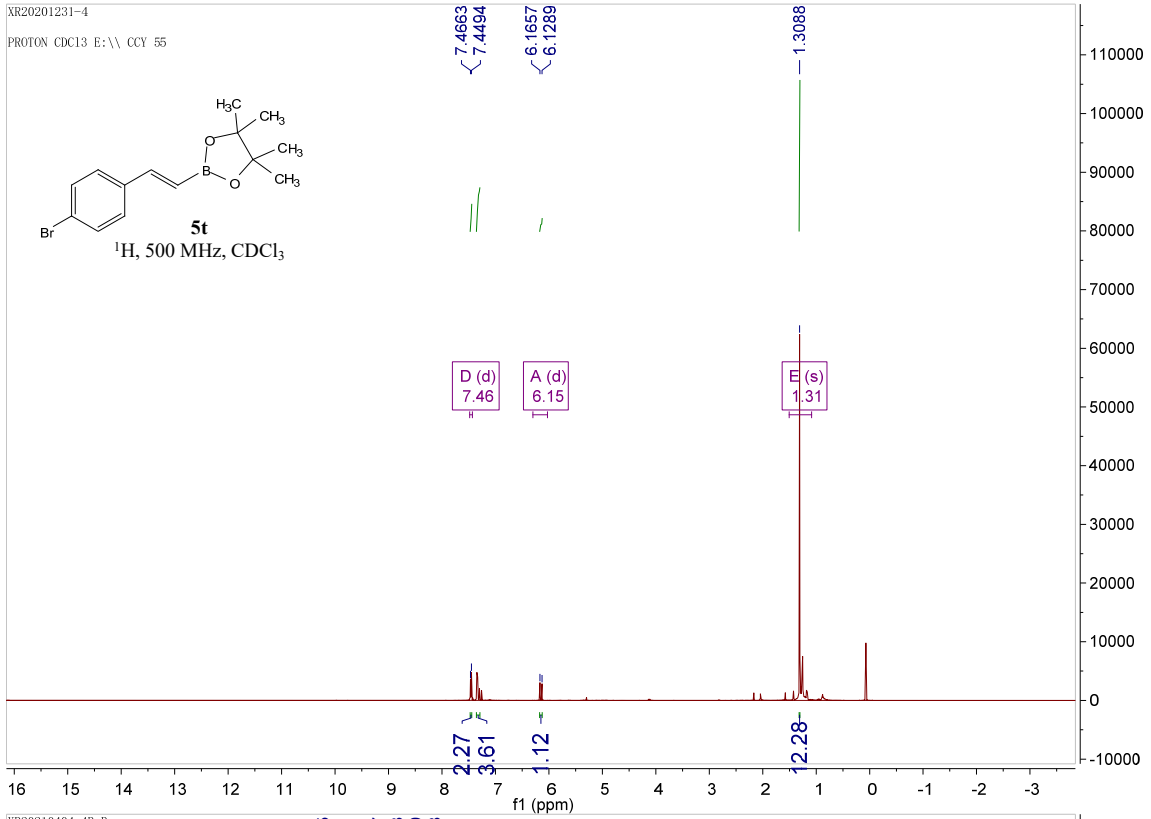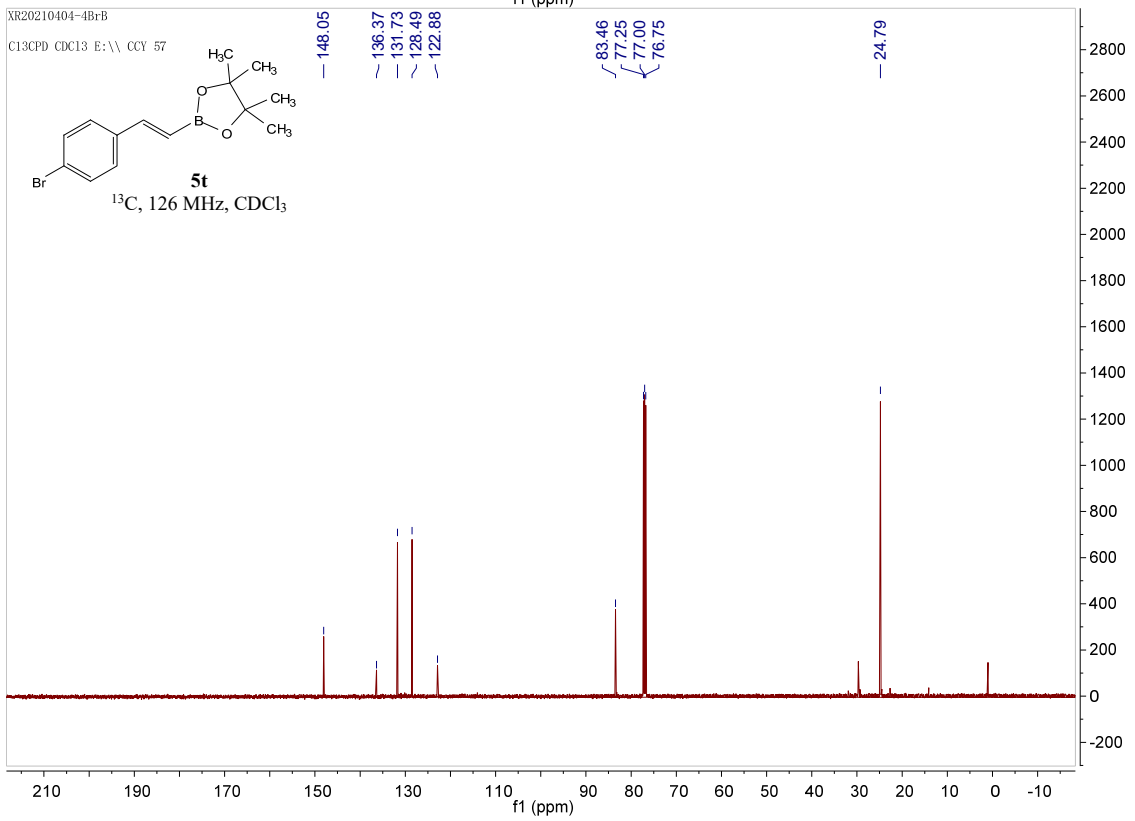

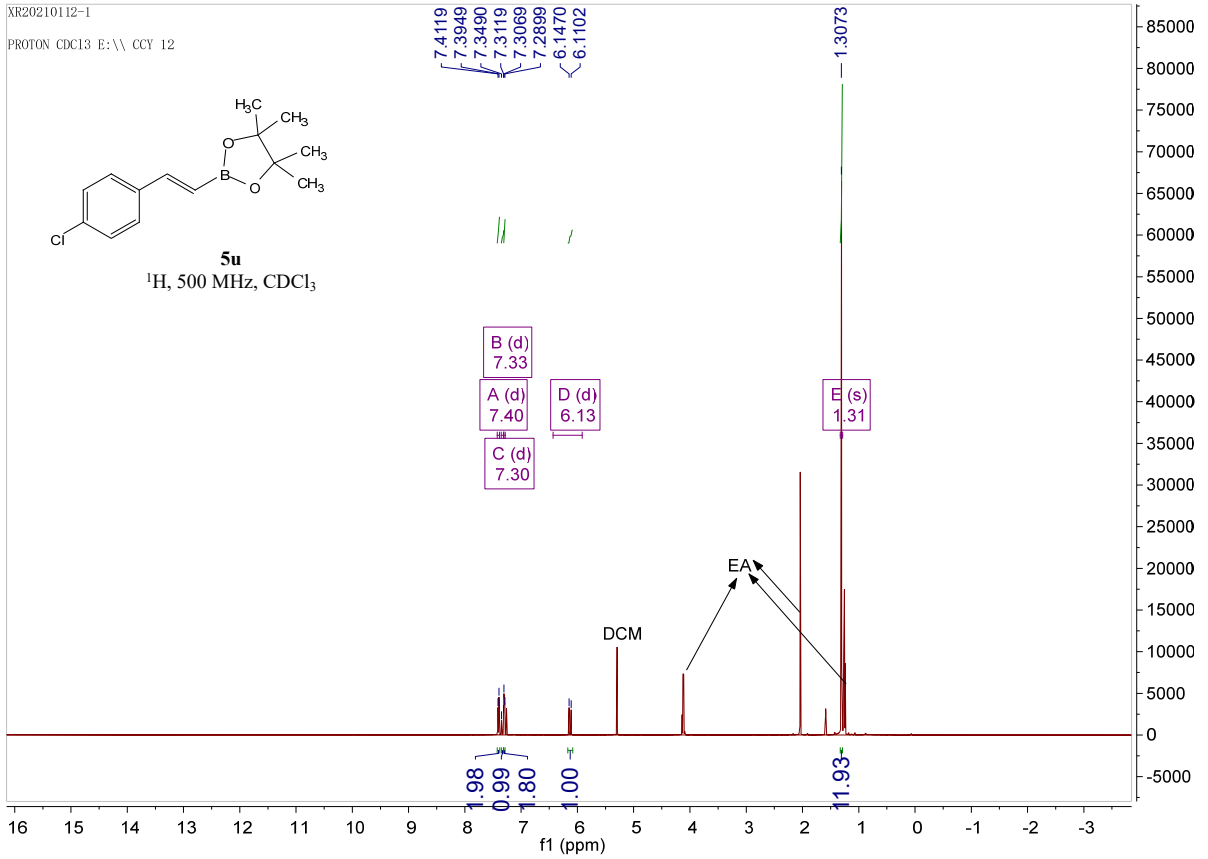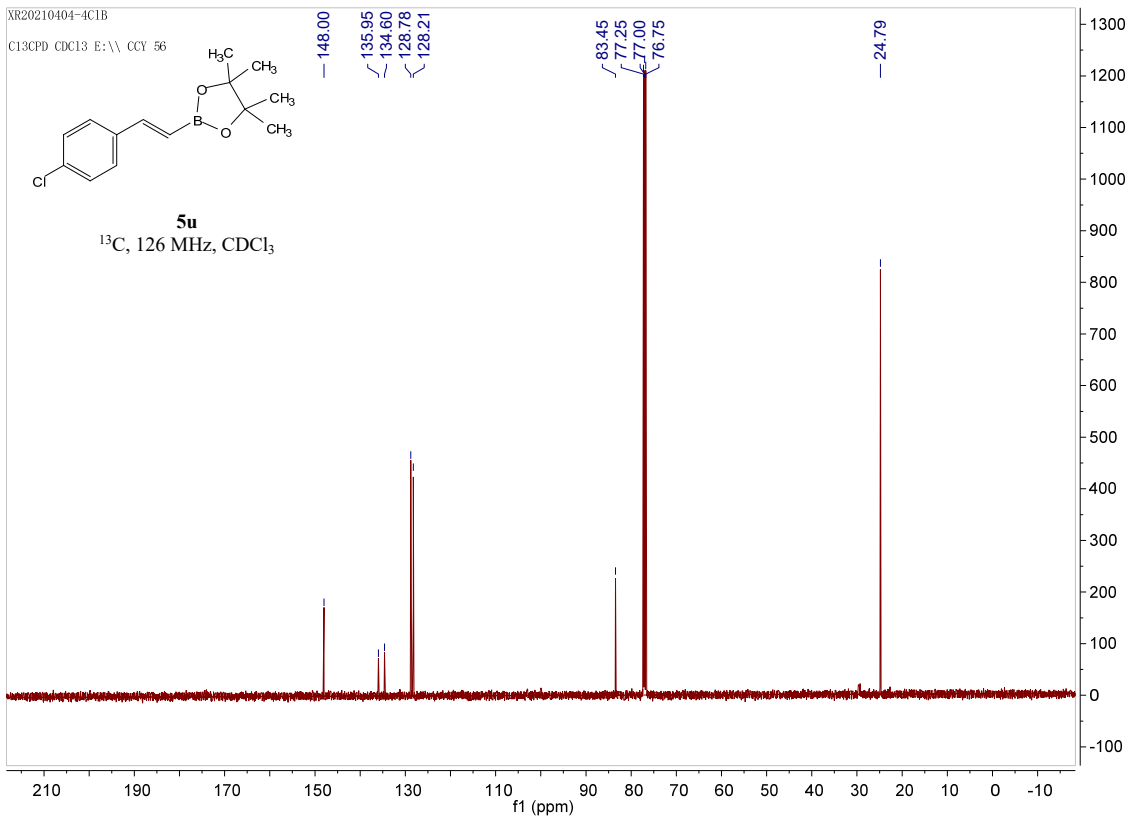

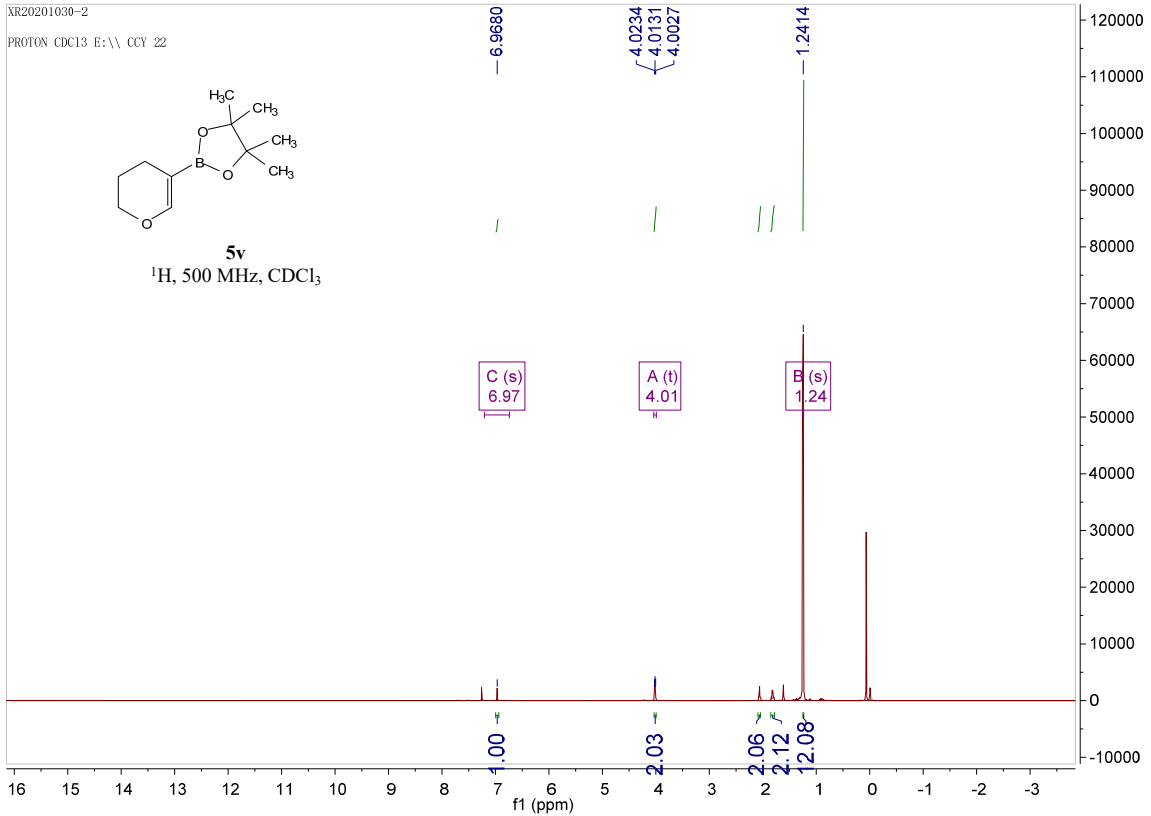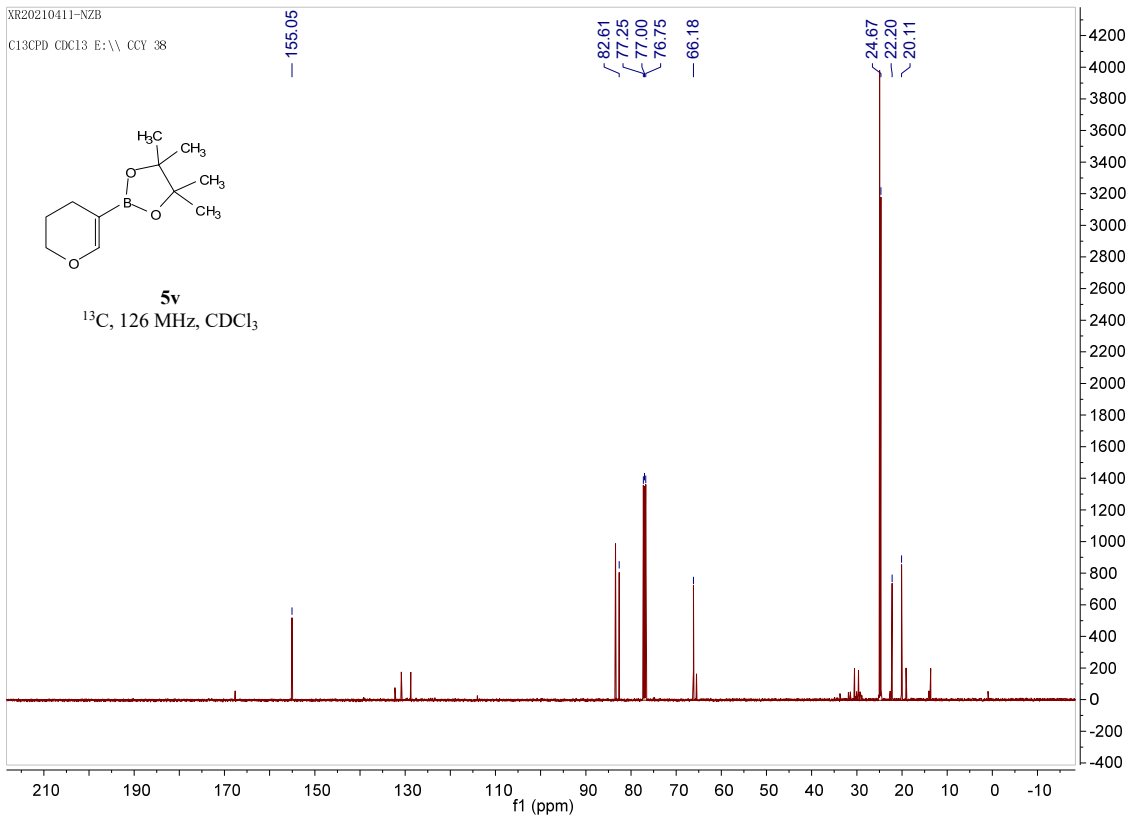

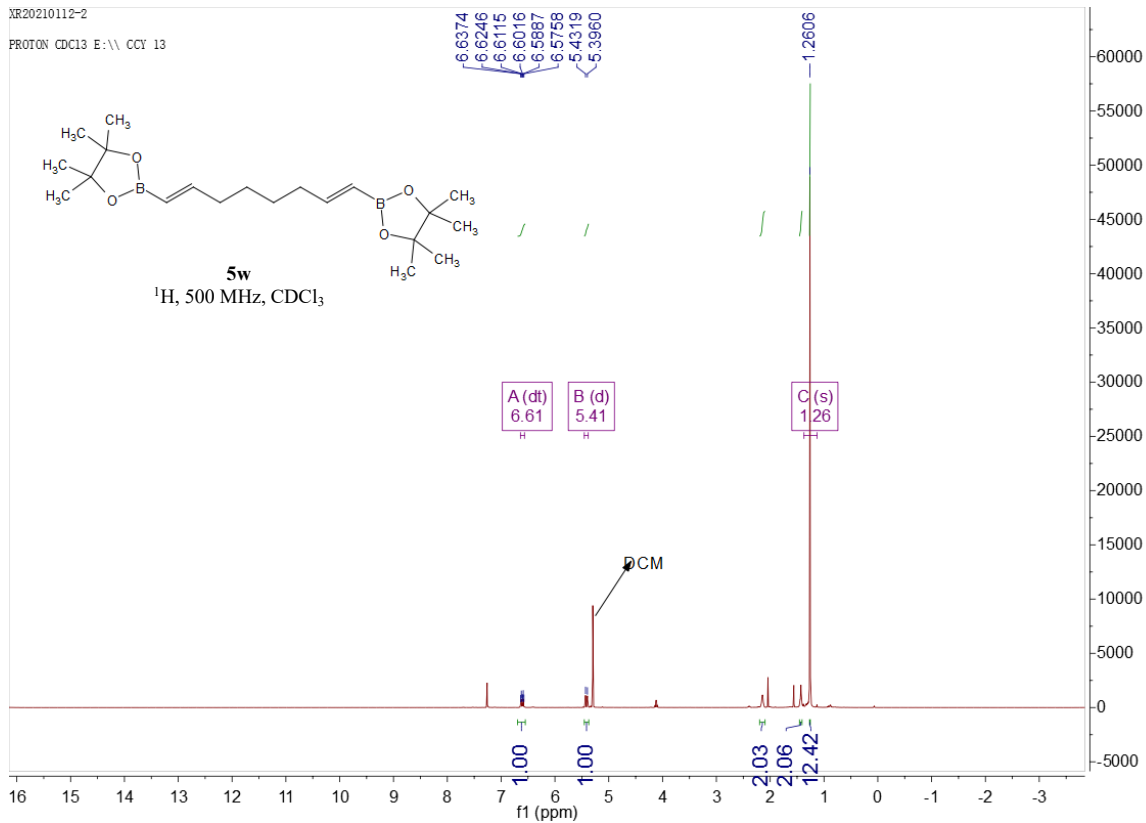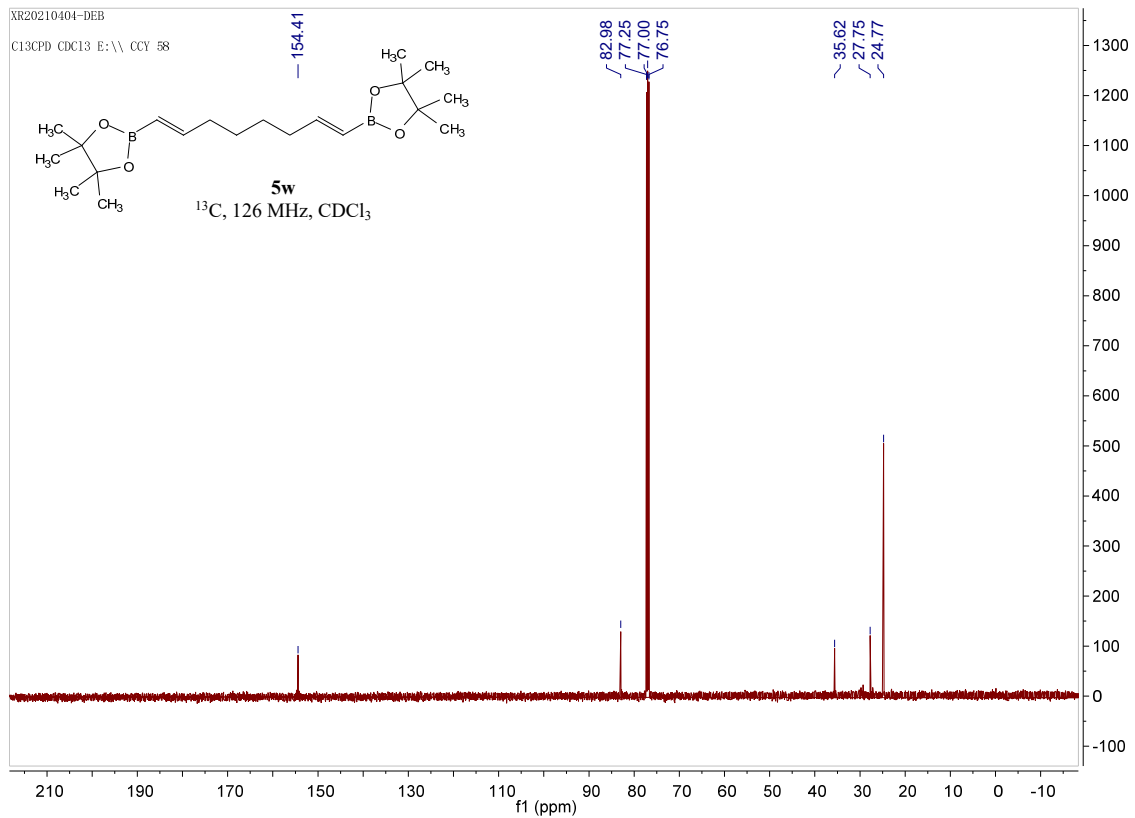

Supplement: d1qo00922b1.pdf [file d1qo00922b1.pdf]
